# Supplementary material for: Greenhouse gas emissions and their trends over the last three decades across Africa
Source: Copernicus journal article supplement (doi:10.5194/essd-2023-186), 2023-07-06
Supplement: Supplementary file 1 [file essd-2023-186-supplement-version4.pdf]

## Supplementary figures and methods

Table S1. Surface flask characteristics over the African continent. Data synthesized from NOAA website: <https://www.noaa.gov>.

| Station name, Country    | Parameter                                              | First sample date                      | Status for the three GHG    | Frequency        | Elevation (in meters above mean sea level) | Cooperating Agencies                    |
|--------------------------|--------------------------------------------------------|----------------------------------------|-----------------------------|------------------|--------------------------------------------|-----------------------------------------|
| Assekrem, Algeria        | CO <sub>2</sub><br>CH <sub>4</sub><br>N <sub>2</sub> O | 12/09/1995<br>12/09/1995<br>12/09/1995 | Terminated since 26/08/2020 | Discrete Monthly | 2710                                       | Algerian National Office of Meteorology |
| Gobabeb, Namibia         | CO <sub>2</sub><br>CH <sub>4</sub><br>N <sub>2</sub> O | 13/01/1997<br>13/01/1997<br>13/01/1997 | Ongoing                     | Discrete Monthly | 456                                        | Gobabeb Training and Research Center    |
| Mahe Island, Seychelles  | CO <sub>2</sub><br>CH <sub>4</sub><br>N <sub>2</sub> O | 15/01/1980<br>12/05/1983<br>13/06/1997 | Ongoing                     | Discrete Monthly | 2                                          | Seychelles Bureau of Standards          |
| Cape Point, South Africa | CO <sub>2</sub><br>CH <sub>4</sub><br>N <sub>2</sub> O | 5/01/1980<br>12/05/1983<br>13/06/1997  | Ongoing                     | Discrete Monthly | 230                                        | South African Weather Service           |
| Mt. Kenya, Kenya         | CO <sub>2</sub><br>CH <sub>4</sub><br>N <sub>2</sub> O | 11/02/2010<br>11/02/2010<br>11/02/2010 | Inactive since 21/06/2011   | Discrete Monthly | 3644                                       | Kenya Meteorological Department         |

14 Table S2. List of African countries per group.

| Country name                                                                                                                                                                       | Group                      |
|------------------------------------------------------------------------------------------------------------------------------------------------------------------------------------|----------------------------|
| Algeria<br>Chad<br>Egypt<br>Eritrea<br>Libya<br>Mali<br>Mauritania<br>Morocco<br>Niger<br>Sudan<br>Tunisia                                                                         | Northern Africa            |
| Benin<br>Burkina Faso<br>Cape Verde<br>Ivory Coast<br>Gambia<br>Ghana<br>Guinea<br>Guinea-Bissau<br>Liberia<br>Nigeria<br>Sao Tome and Principe<br>Senegal<br>Sierra Leone<br>Togo | Subsahelian Western Africa |
| Cameroon<br>Central African Republic<br>Democratic Republic of the Congo<br>Gabon<br>Republic of the Congo<br>South Sudan                                                          | Central African countries  |
| Burundi<br>Comoros<br>Djibouti<br>Ethiopia<br>Kenya<br>Rwanda<br>Seychelles<br>Somalia<br>Uganda<br>United Republic of Tanzania                                                    | Horn of Africa             |
| Angola<br>Botswana<br>Madagascar<br>Malawi<br>Mauritius<br>Mozambique<br>Namibia<br>Zambia<br>Zimbabwe                                                                             | Southern countries         |
| Lesotho<br>South Africa<br>Swaziland                                                                                                                                               | Group of South Africa      |

15

16 **Methodological Supplementary M1 - discussion about the rescaling for CO<sub>2</sub> inversions**  
 17

18 We operated a rescaling by subtracting back the prescribed fossil fuel fluxes to make sure that the  
 19 inversions do not differ regarding prior fluxes for better comparability.  
 20

21 **Figure S1. Comparison of PRIMAP-hist, GCP versus prescribed fossil fluxes for three CO<sub>2</sub> inversion models at the**  
 22 **regional scale.**

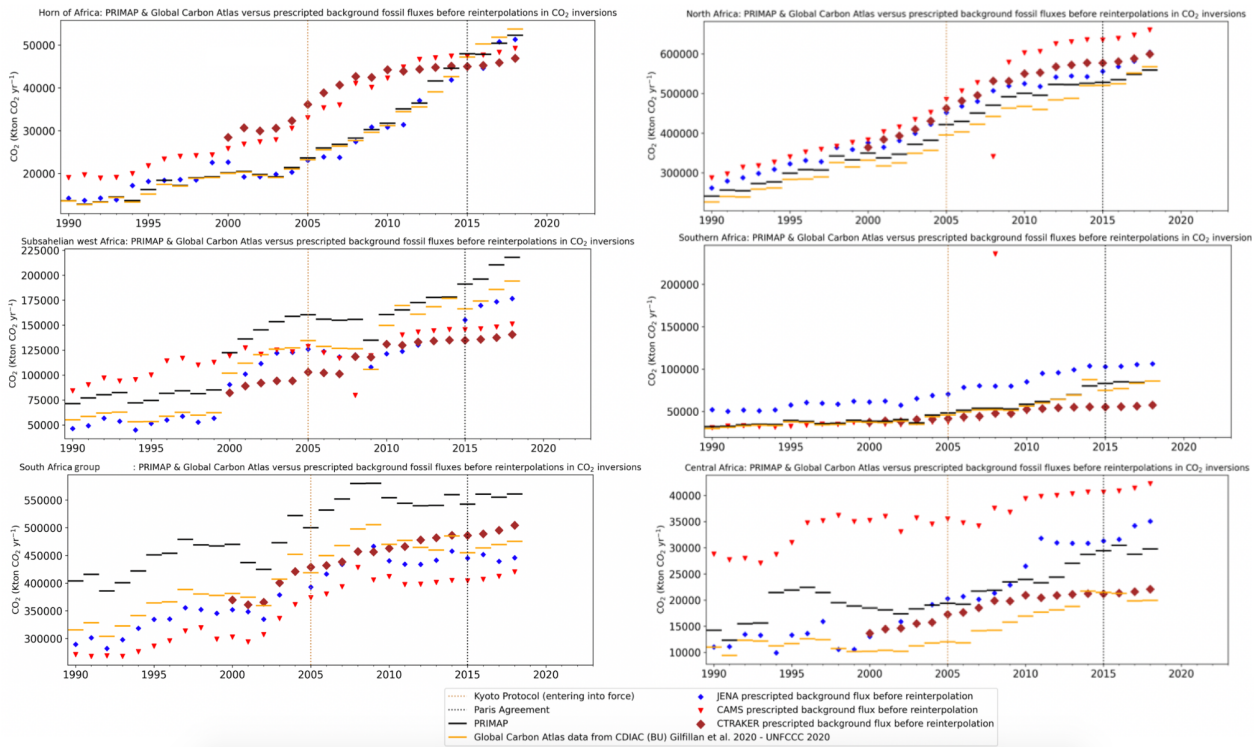

## Map of six groups of African countries

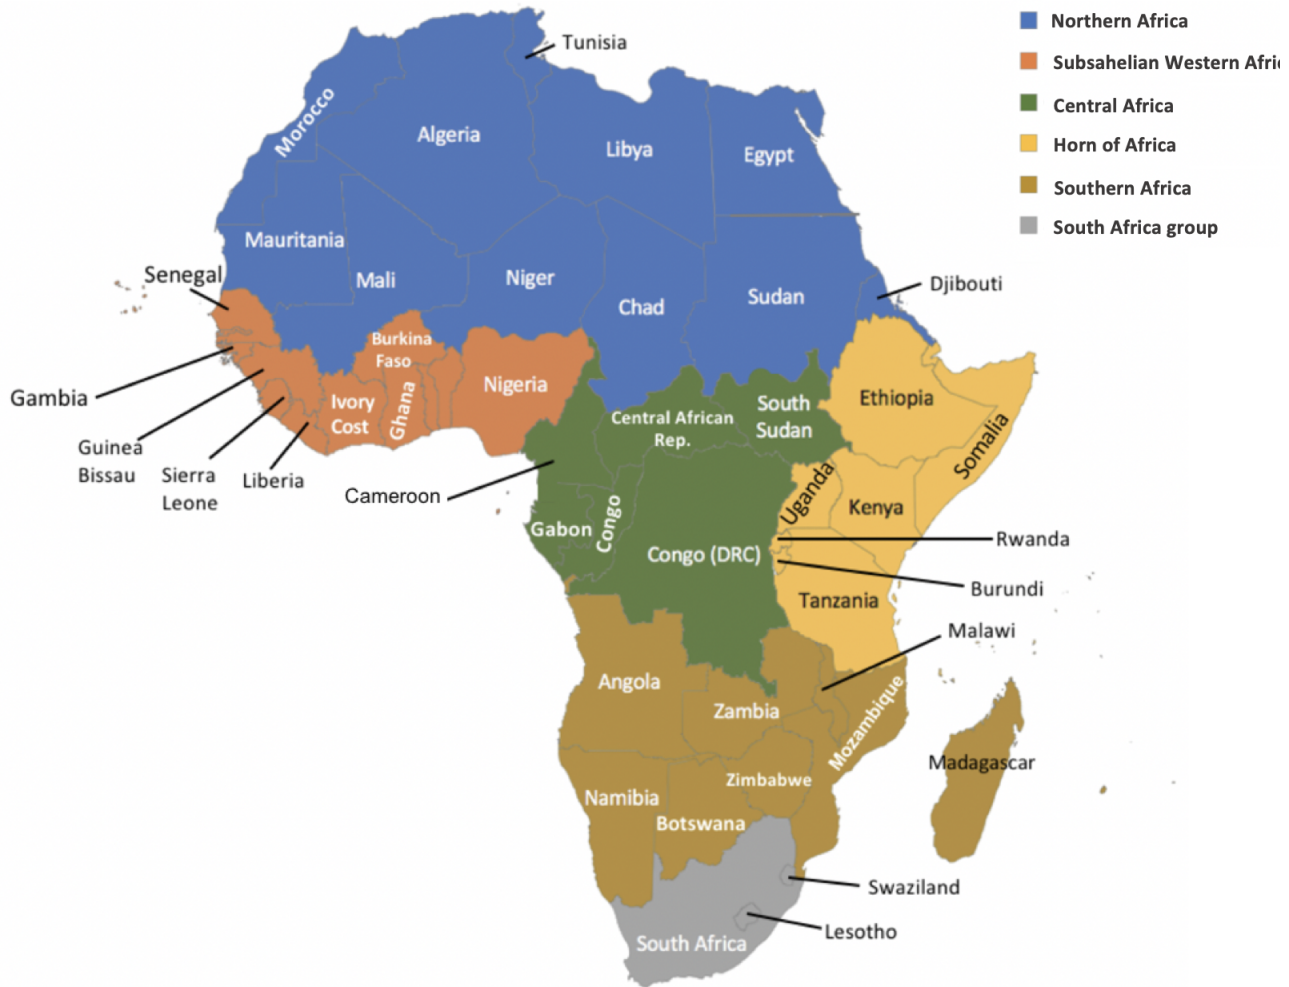

Powered by Bing  
© GeoNames, Microsoft, TomTom

Figure S2. Map of six African groups.

24  
25  
26  
27  
28  
29  
30

31

Table S3. Data sources for the anthropogenic fossil CO<sub>2</sub> emissions included in this study.

| Method | Product type /<br>file name | Species                                                                                                                                                 | Overall period<br>covered | References                                                                                                                                           |
|--------|-----------------------------|---------------------------------------------------------------------------------------------------------------------------------------------------------|---------------------------|------------------------------------------------------------------------------------------------------------------------------------------------------|
| BU     | GCP/CDIAC                   | CO <sub>2</sub> fossil country totals with detailed emissions separating different subsectors                                                           | 1990-2019                 | -GCP (Le Quéré et al., 2018; Friedlingstein et al., 2019)<br>-CDIAC<br><a href="https://cdiac.ess-dive.lbl.gov/">https://cdiac.ess-dive.lbl.gov/</a> |
| BU     | PRIMAP-hist                 | CO <sub>2</sub> , CH <sub>4</sub> and N <sub>2</sub> O fossil country totals (excluding LULUCF) with detailed emissions separating different subsectors | 1990-2019                 | -PRIMAP<br><a href="https://www.pik-potsdam.de/paris-reality-check/primap-hist/">https://www.pik-potsdam.de/paris-reality-check/primap-hist/</a>     |

32  
33  
34  
35  
36  
37  
38  
39  
40  
41  
42  
43  
44  
45  
46  
47  
48  
49  
50  
51  
52  
  
53  
54  
55  
56

Per capita CO<sub>2</sub> and CH<sub>4</sub> emissions in tCO<sub>2</sub>eq. for (2013-2017) per African country and color group

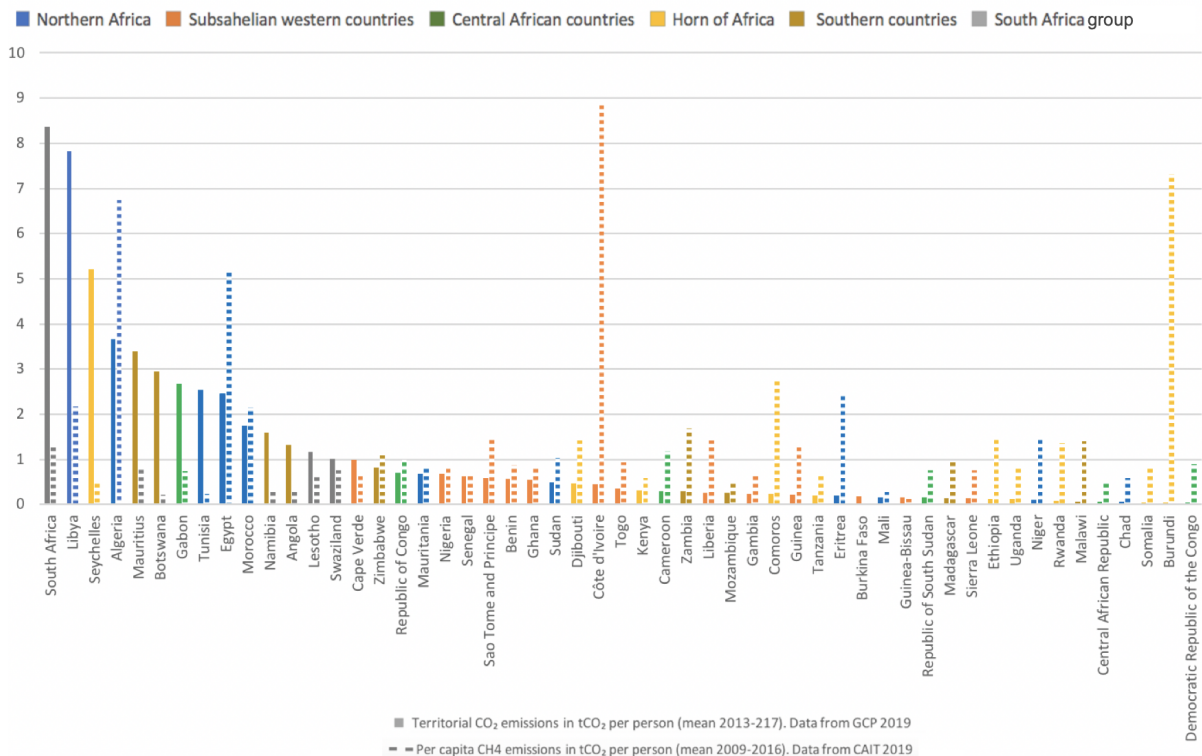

57 **Figure S3. Bar plots of detailed African emissions for the mean values of the recent five years for fossil CO<sub>2</sub> and**  
 58 **anthropogenic CH<sub>4</sub> in tCO<sub>2</sub>e per capita, and by group color for 2009-2016.**

59  
60

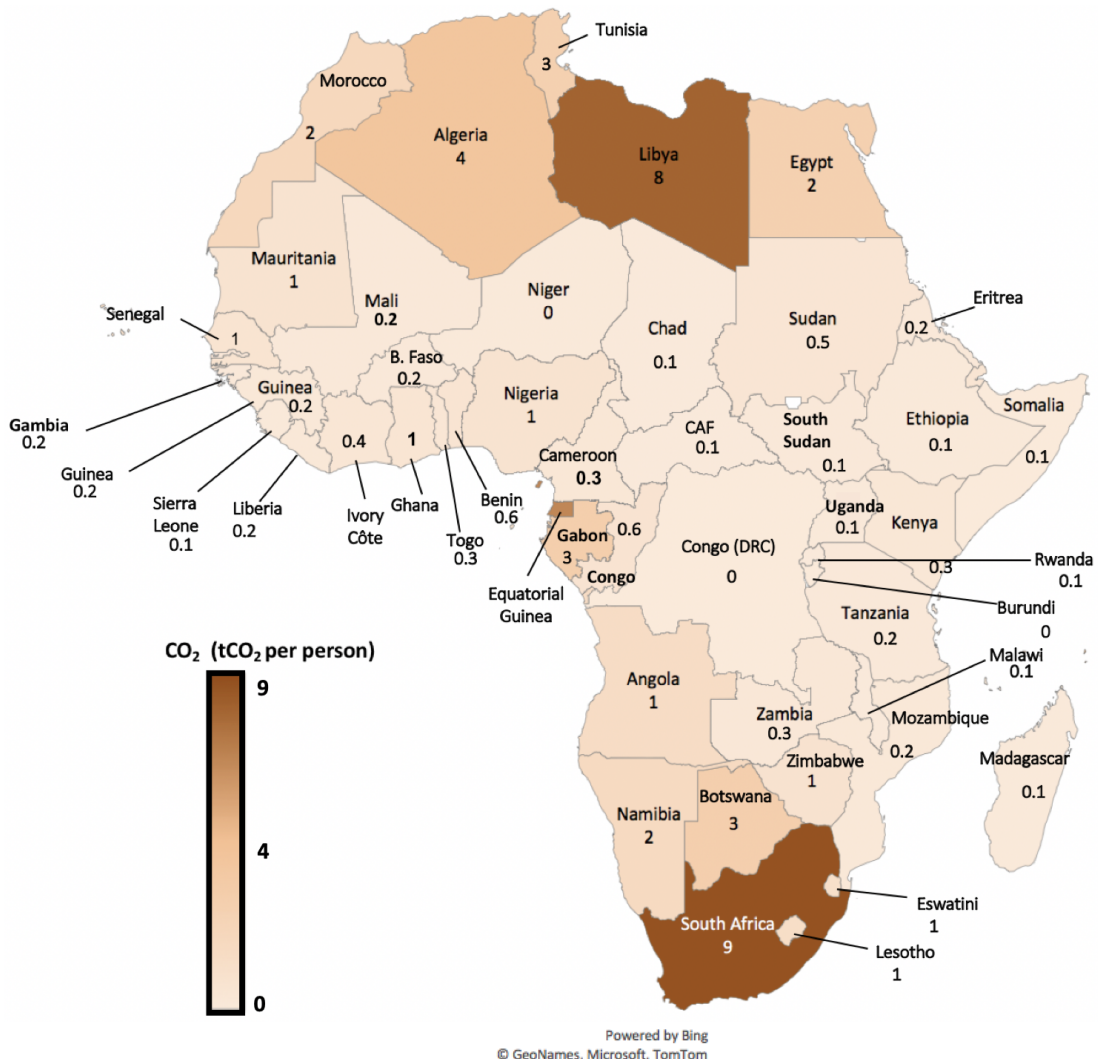

Figure S4. Map of African decennial 2009-2018 GCP CO<sub>2</sub> fossil fuel emissions per capita in tCO<sub>2</sub> per person - CDIAC.

61  
62  
63  
64  
65  
66  
67  
68  
69  
70  
71  
72  
73

74 **Methodological supplementary M2. Steps for computing the GINI index of African country emissions.**

75

76 The GINI index is a metric assessing the level of dispersion and therefore the level of inequalities among  
77 the values of a given dataset. To show the inequalities of per capita emissions among the African countries,  
78 we computed the continent GINI index for each of the last three decades using the Pareto principle for the  
79 following fluxes: fossil CO<sub>2</sub> per capita emissions, CH<sub>4</sub> fossil + agriculture per capita emissions, CH<sub>4</sub> from  
80 agriculture per capita emissions.

81 We computed the GINI using the Pareto method also named 20/80 or ABC method, using an excel file  
82 for the several countries' data manipulation. We obtained the GINI index ( $\gamma$ ) thanks to the formula:

83

84 
$$\gamma = \frac{[(\sum_{i=1}^n y_i \times x_i) - 5000]}{5000}$$

85

86 When  $\gamma$  is bigger than 0.6, it means that the area delimited by the curve of the cumulated criterion and the  
87 graph diagonal represents more than 60% of the surface of half of the graph, and that the dispersion of the  
88 dataset is high. This method was built in the 19<sup>th</sup> century based on Vilfredo Pareto's observations  
89 regarding the inequalities of repartition of the volume of housing taxes among the taxpayers (he realized  
90 that 80% of this tax was paid by 20% of the taxpayer.) The different steps that we followed to compute the  
91 GINI are detailed below:

- 92 1) computation of the territorial emissions per capita in every African country,
- 93 2) ranking in a decreasing order (from the highest to the smallest one),
- 94 3) computation of the cumulative emissions,
- 95 4) creation of a column with the cumulative emissions expressed as a percentage,
- 96 5) creation of a column with a rank (integer) for those ordered emissions from the biggest to the  
97 smallest,
- 98 6) conversion of this rank as a percentage in another column,
- 99 7) distinction of the emissions representing less than 25% of emissions, less than 50%, and less than  
100 75% of emissions.
- 101 8) computation of the GINI index ( $\gamma$ ) thanks to the Pareto's formula given above.

102

103

104



105 **Methodological supplementary M3. Computation of correlation coefficient.**

106

107 In mathematics, the linear correlation between two variables that we can call X and Y implies that  
108 two variables have a linear relationship between each other. If there is a linear relation between  
109 two variables, it can be represented by a straight line. To compute this linear correlation coefficient,  
110 we use the Pearson formula that is the computation of the covariance among variables ( $\text{cov}(X,Y)$ ),  
111 divided by the product of their standard deviation ( $\sigma_X$  and  $\sigma_Y$ ). Thus, we can compute the linear  
112 correlation  $\rho_{XY}$  among two variables by using the following formula:  $\rho_{XY} = \frac{\text{cov}(X,Y)}{\sigma_X \sigma_Y}$

113 The higher the absolute value of a linear correlation coefficient between two variables, the more  
114 the variables are linearly correlated.

115

116

117

118

119

120

121

122

123

124

125

126

127

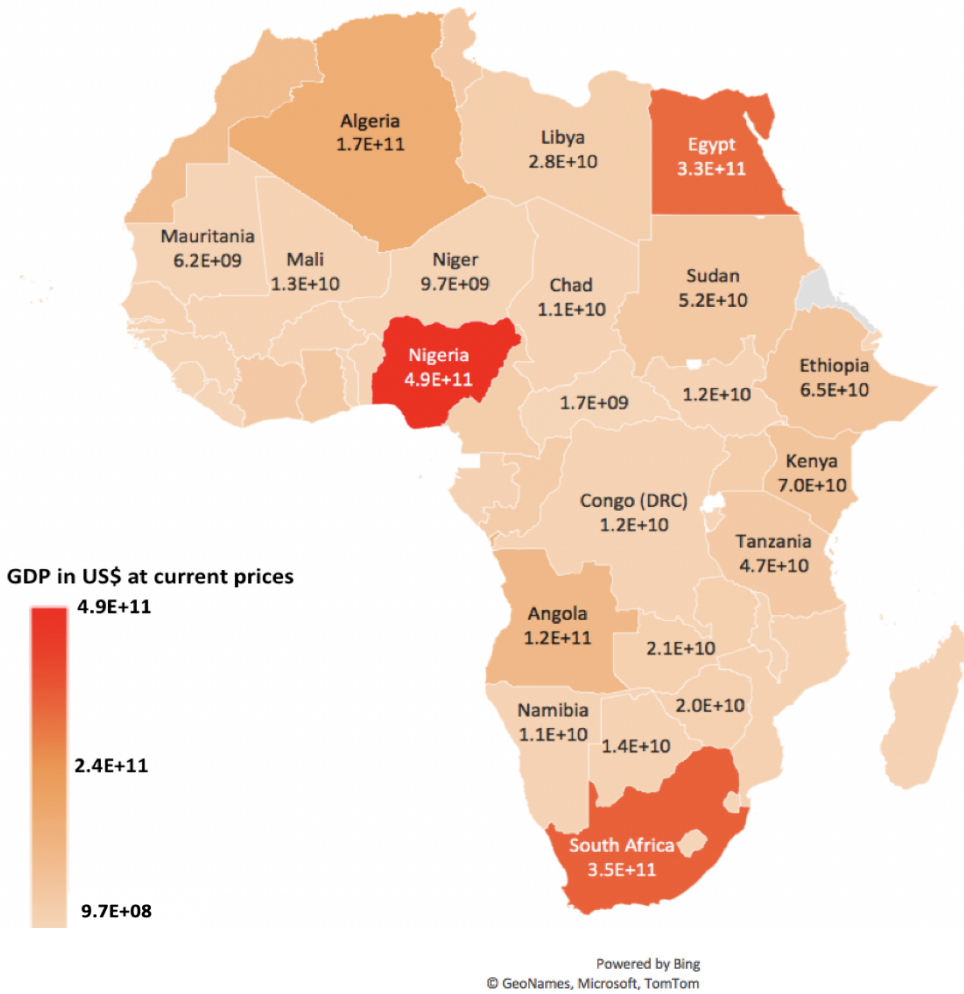

128

129

130 **Figure S5. Bar plots and associated map of African GDP in US\$ for the year 2015, dataset taken from World Bank national**  
 131 **accounts data/OECD (2020).**

132

133

134

135

136

137

138

139

140

141

142

143

144

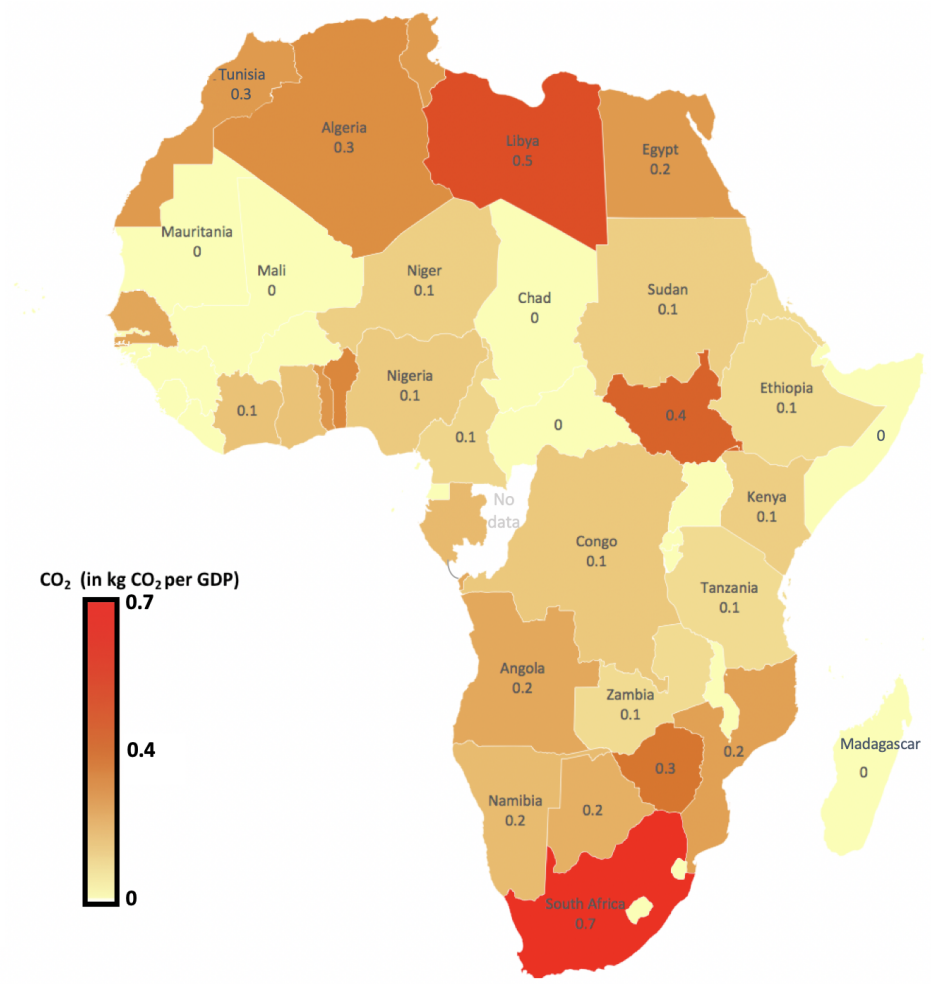

Powered by Bing  
© GeoNames, Microsoft, TomTom

146  
147 **Figure S6. Map of territorial mean 2013-2017 emissions and its associated bar plots in kg CO<sub>2</sub> of GDP, dataset taken from**  
148 **GCP 2019 (CDIAC).**

149  
150  
151  
152  
153  
154

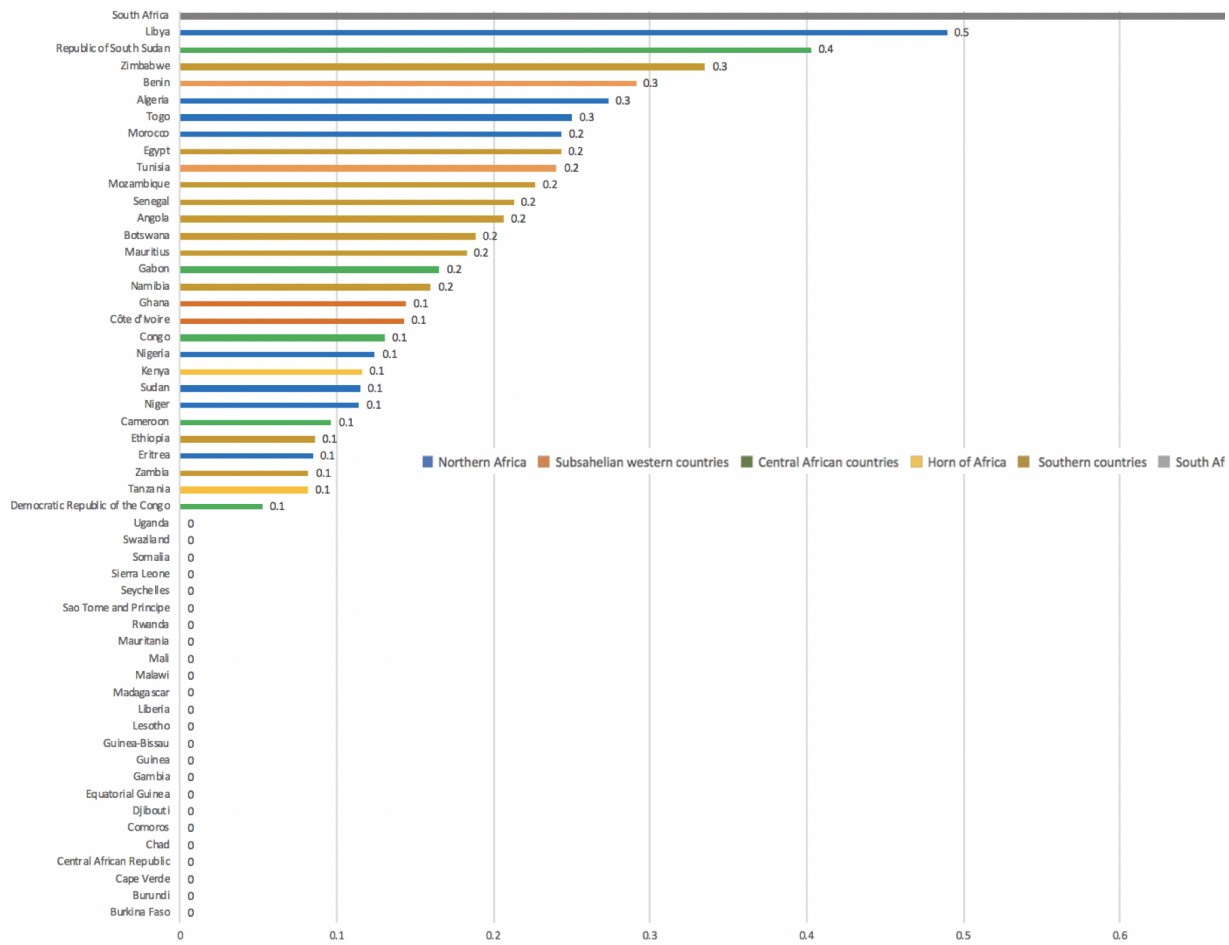

155

156 **Figure S6 bis. Map of territorial mean 2013-2017 emissions and its associated bar plots in kgCO<sub>2</sub> per GDP, dataset taken**  
 157 **from GCP 2019 (CDIAC).**

158

159

160

161

162

163

164

165

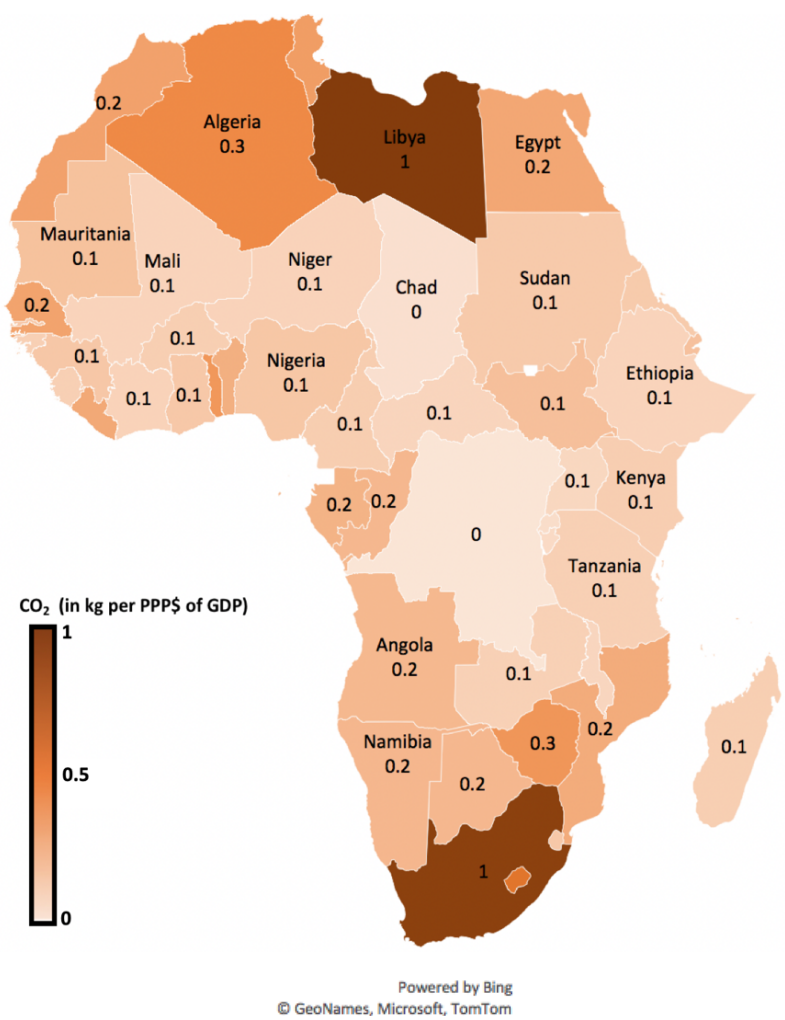

166  
167  
168  
169

Figure S7. Map of African CO<sub>2</sub> emissions expressed in kg per PPP\$ of GDP in 2016 - CDIAC.

a) Map of African countries CO<sub>2</sub> fossil differences over 1990-1998 in terms of ratio percentage between GCP and PRIMAP-hist datasets : (GCP minus PRIMAP)/(mean(GCP, PRIMAP))

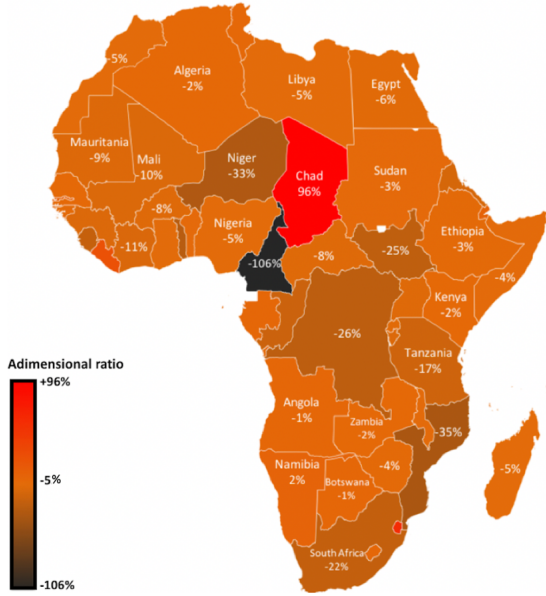

b) Map of African countries CO<sub>2</sub> fossil differences over 1999-2008 in terms of ratio percentage between GCP and PRIMAP-hist datasets : (GCP minus PRIMAP)/(mean(GCP, PRIMAP))

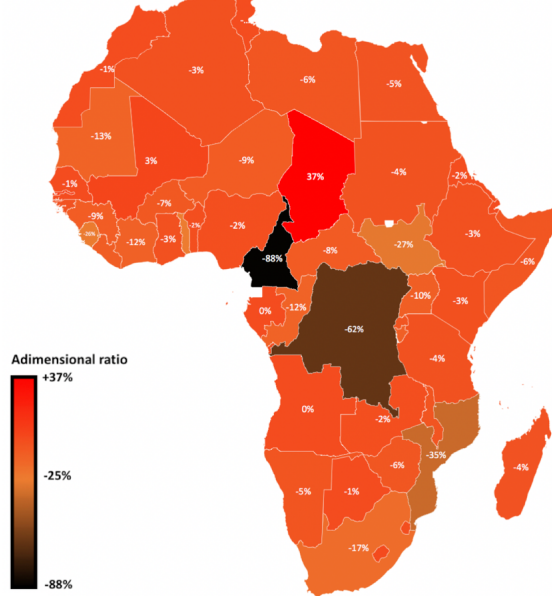

c) Map of African countries CO<sub>2</sub> fossil differences over 2009-2018 in terms of ratio percentage between GCP and PRIMAP-hist datasets : (GCP minus PRIMAP)/(mean(GCP, PRIMAP))

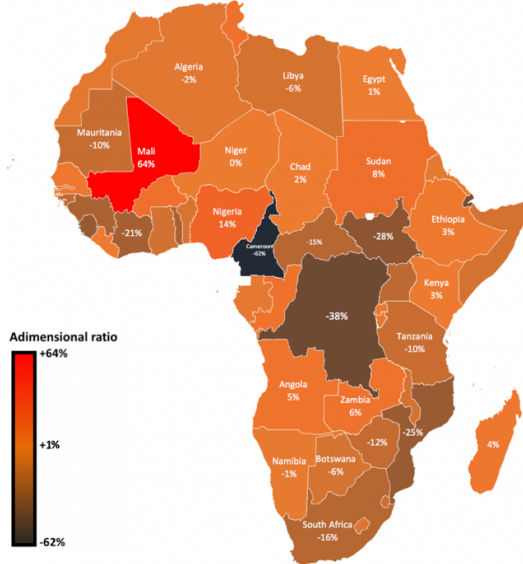

170  
171  
172

173  
174  
175

Figure S8. Three maps of African countries fossil CO<sub>2</sub> emissions per decade: ratio percentage showing the discrepancies between GCP and PRIMAP-hist datasets over three decades (1990-2018).

**Table S4. List of Least Developed Countries and Small Islands Developing States in Africa.**

| 33 Least Developed Countries (LDCs)                                                                                                                                                                                                                                                                                                                  | 6 Small Islands Developing States (SIDS)                                          |
|------------------------------------------------------------------------------------------------------------------------------------------------------------------------------------------------------------------------------------------------------------------------------------------------------------------------------------------------------|-----------------------------------------------------------------------------------|
| Angola, Benin, Burkina Faso, Burundi, Central African Republic, Chad, Comoros, D.R. Congo, Djibouti, Eritrea, Ethiopia, Gambia, Guinea, Guinea-Bissau, Lesotho, Liberia, Madagascar, Malawi, Mali, Mauritania, Mozambique, Niger, Rwanda, São Tomé and Príncipe, Senegal, Sierra Leone, Somalia, South Sudan, Sudan, Tanzania, Togo, Uganda, Zambia. | Cape Verde, Comores, Guinea-Bissau, Mauritius, Sao Tomé and Príncipe, Seychelles. |

**Table S5. List of corrected countries for CO<sub>2</sub> LULUCF (in MtCO<sub>2</sub>) - corrections in line with Grassi (2022)**

| Country                          | Year of most recent outlier report | Outlier value and source | Year corrected data | Corrected data and source     | Mean corrected value over 2000-2020 | Mean difference over 2000-2020 | Comments on the chosen correcting method.                                                                                                                                                                                                                                            |
|----------------------------------|------------------------------------|--------------------------|---------------------|-------------------------------|-------------------------------------|--------------------------------|--------------------------------------------------------------------------------------------------------------------------------------------------------------------------------------------------------------------------------------------------------------------------------------|
| CAF                              | 2010                               | -1766 (NC2)              | 2016                | -229 (NDC)                    | -229                                | 1537                           | NDC 2016 because more recent than NC2 (2015), and sink in most recent NDC 2021 biophysically impossible.                                                                                                                                                                             |
| Guinea-Bissau                    | 2001                               | -11288 (NC1)             | 2010                | -1 (NC2)                      | -1                                  | -11287                         | NC1 value reports an unrealistically high sink.                                                                                                                                                                                                                                      |
| Tanzania                         | 1994                               | 810 (NC2)                | 2022                | 77 (NDC 2022 <sup>1</sup> )   | 77                                  | 566                            | NDC is more recent and underlines a more realistic order of magnitude.                                                                                                                                                                                                               |
| Guinea                           | 2000                               | -444 (NC2)               | 2021                | 34 (NDC 2021)                 | 34                                  | 478                            | NDC 2021 chosen because more recent than NC2 (2018), and the sink in NC2 is biophysically impossible (-444 MtCO <sub>2</sub> .yr <sup>-1</sup> over only 5 Mha of forest). However, a remaining problem with the corrected value from nc2 is that no forest sink at all is reported. |
| Namibia                          | 2000                               | 11 (NC3)                 | 2019                | -117 (NIR 2019 <sup>2</sup> ) | -106                                | -117                           | NIR 2019 chosen because more recent than NC3 (2015) and more complete than NDC 2021 which is more recent.                                                                                                                                                                            |
| Mali                             | 2010                               | -245 (NC3)               | Mean 2000 and 2010  | -221 (mean of NC2 and NC3)    | -155                                | 66                             | Mean of NC2 and NC3 as more complete than REDD+. The sink in NC3 is high and here considered implausible, but it is however consistently reported in various official UNFCCC documents.                                                                                              |
| Democratic Republic of the Congo | 2015                               | -235 (NC3)               | 2021                | 529 (NDC 2021)                | 529                                 | 761                            | NDC 2021 chosen because more recent than the NC3 (2015) and broadly consistent with REDD+ (2018). But a weakness of this correction source is that it does not report any carbon sink from forest.                                                                                   |
| Madagascar                       | 2010                               | -97 (NC3)                | 2017                | 34 (REDD+ 2018)               | 34                                  | 131                            | REDD+ (2018) chosen because more recent than NC3 (2017), but it covers only deforestation. NC3 reports a biophysically impossible sink over only 9 Mha of forest.                                                                                                                    |
| Nigeria                          | 2014                               | 98 (NC2)                 | 2017                | 315 (BUR2)                    | 287                                 | 189                            | BUR2 (2021) chosen because more recent than NC2 (2014) and more detailed than NDC 2021 which report different numbers.                                                                                                                                                               |
| Zimbabwe                         | 2006                               | -83 NC3 (2017)           | 2021                | 16 (BUR1)                     | 11                                  | 95                             | BUR1 (2021) as more recent than the NC3 (2017) and more complete than NDC 2021.                                                                                                                                                                                                      |
| Congo                            | Since 2000                         | -83 (NC2)                | 2009                | -18 (NC2)                     | -18                                 | 65                             | NDC2021 chosen because more recent than the NC2 (2009).                                                                                                                                                                                                                              |
| Angola                           | 2012                               | 0.7 (NC1)                | 2021                | 55 (NC2)                      | 55                                  | 54                             | NC2 (2021) chosen because more recent than NC1 (2012).                                                                                                                                                                                                                               |
| Mauritius                        | 2013                               | -490 (NC3)               | 2016                | 0 (NIR 2021)                  | 0                                   | 490                            | NIR 2021 more recent than NC3 (with unrealistically high value).                                                                                                                                                                                                                     |

<sup>1</sup>Using Tanzania GHGs Inventory Report and MRV System (2018).<sup>2</sup>NIR = National Inventory Report (NIR).

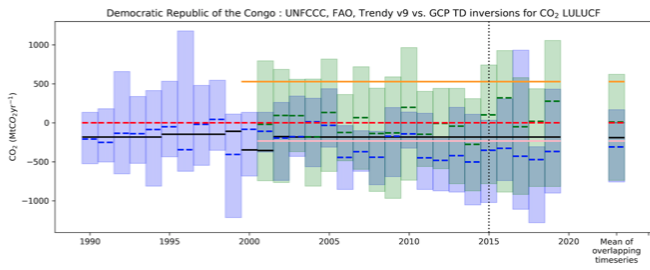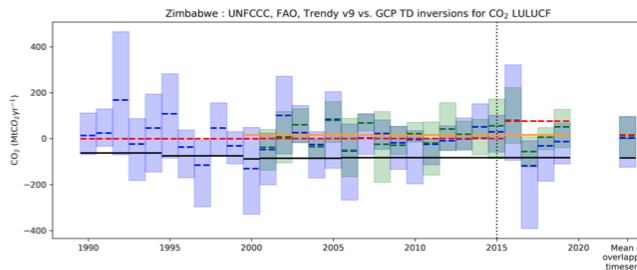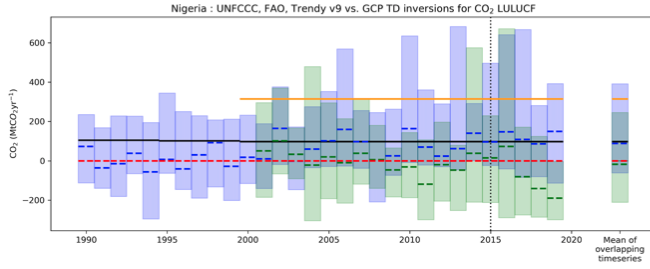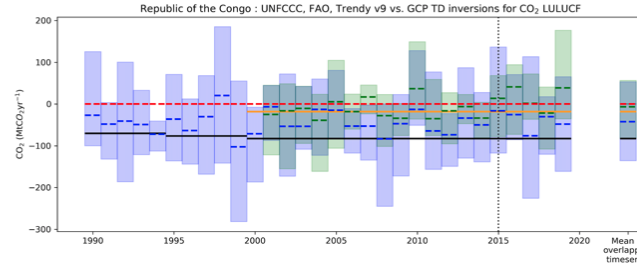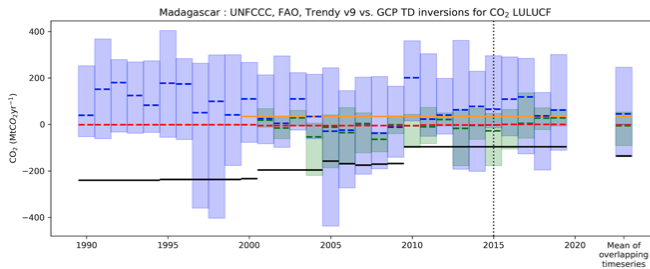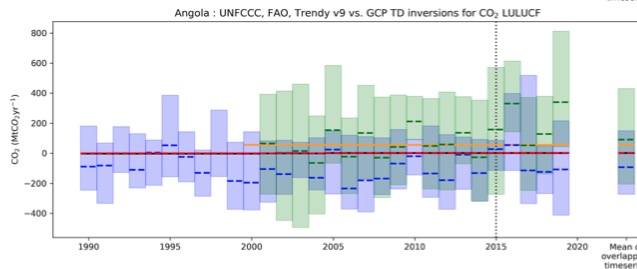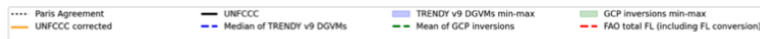



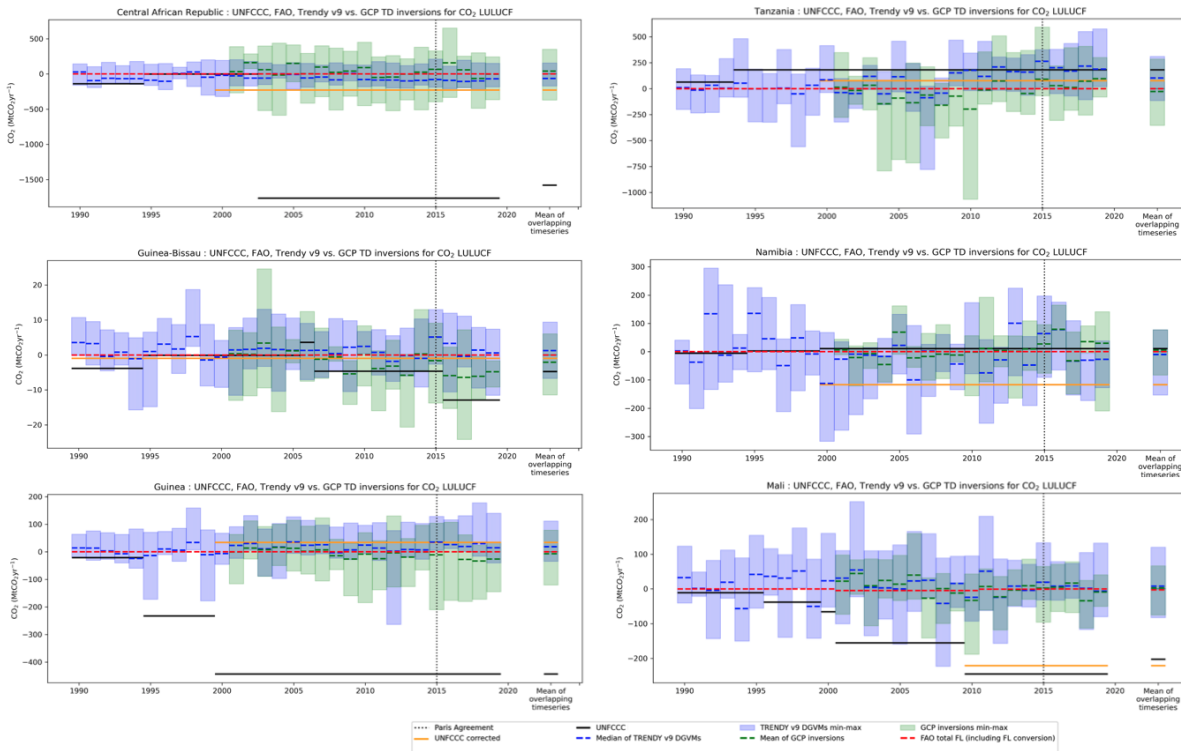

183

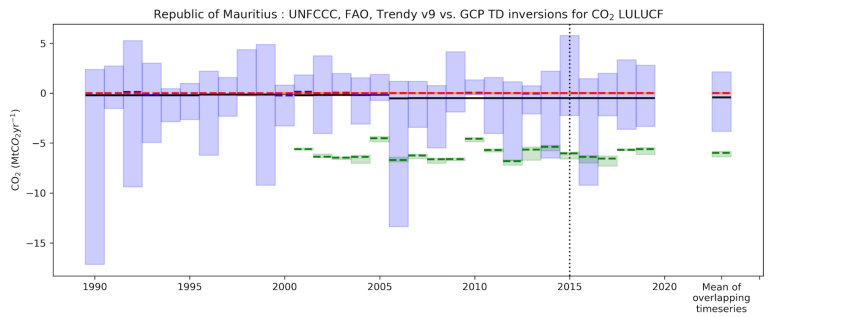

184

185

**Figure S9. Country details for LULUCF CO<sub>2</sub> emissions and sinks from UNFCCC corrected (strictly consistent with Grassi et al. 2022) for 13 African countries that we identified as outliers vs. UNFCCC uncorrected data, TRENDY v9, DGVMs and GCP (2020) inversions. Unit is in MtCO<sub>2</sub>. Black lines denote the PRIMAP-hist estimates for total anthropogenic emissions including all IPCC sectors. Shaded green areas represent the minimum and maximum ranges from GCP inversions. Shaded blue areas represent the minimum and maximum ranges for TRENDY v9 DGVMs. Green dashes denote the median of GCP inversions, blue dashes denote the median of TRENDY v9 DGVMs, green dashes the median of GCP inversions. The positive values represent a source while the negative values refer to a sink.**

186

187

188

189

190

191

192

193

194

**Table S6. Data sources for the land CO<sub>2</sub> emissions in this analysis.**

| Method | Product type / file name                                                                                                                                                | Species                                                              | Overall period covered | References                                                                                             |
|--------|-------------------------------------------------------------------------------------------------------------------------------------------------------------------------|----------------------------------------------------------------------|------------------------|--------------------------------------------------------------------------------------------------------|
| BU     | TRENDY v9 (2019) 14<br>DGVMs :<br>CABLE,<br>CLASS,<br>CLM5, DLEM,<br>ISAM,<br>JSBACH,<br>JULES, LPJ,<br>LPX, OCN,<br>ORCHIDEE-<br>CNP,<br>ORCHIDEE,<br>SDGVM,<br>SURFEX | Land-related<br>Carbon<br>emissions (Net<br>Biome<br>Productivity)   | 1900-2019              | Met Office UK/ Le<br>Quéré et al. (2018)<br><a href="http://www.icos-cp.eu/GCP">www.icos-cp.eu/GCP</a> |
| BU     | UNFCCC                                                                                                                                                                  | LULUCF Net<br>CO <sub>2</sub> emissions /<br>removals                | 1990-2015              | UNFCCC<br><a href="https://unfccc.int/non-annex-I-NCs">https://unfccc.int/non-annex-I-NCs</a>          |
| TD     | GCB 2019                                                                                                                                                                | Total CO <sub>2</sub><br>inverse flux (Net<br>Biome<br>Productivity) | 2000-2018              | Friedlingstein et al.<br>(2020)                                                                        |
|        | Carbon<br>Tracker Europe<br>(CTE)                                                                                                                                       |                                                                      | 2000-2018              | van der Laan-Luijke<br>et al. (2017)                                                                   |
|        | CAMS (in-situ)                                                                                                                                                          |                                                                      | 2000-2018              | Chevallier et al.<br>(2005)<br>Rödenbeck (2005)                                                        |
|        | Jena<br>CarboScopeReg<br>(in situ)                                                                                                                                      |                                                                      | 2006-2010              | Kountouris et al.<br>(2018)                                                                            |

196  
197  
198  
199  
200  
201  
202  
203  
204  
205  
206

Table S7. Data sources for total CH<sub>4</sub> emissions in this analysis.

| Method/observations                            | Product type / number of inversions                        | Overall period covered | References                                                   |
|------------------------------------------------|------------------------------------------------------------|------------------------|--------------------------------------------------------------|
| TD (surface stations)                          | Carbon Tracker-Europe CH <sub>4</sub> , CTE_SURF (FMI)/ 1  | 2000-2017              | Tsuruta et al. (2017)                                        |
| TD (GOSAT NIES L2 v2.72)                       | Carbon Tracker-Europe CH <sub>4</sub> , CTE_GOSAT (FMI)/ 1 | 2000-2017              | Tsuruta et al. (2017)                                        |
| TD (surface stations)                          | GELCA_SURF (NIES)/ 1                                       | 2000-2015              | Ishizawa et al. (2016)                                       |
| TD (surface stations)                          | LMDZ_PYVAR (LSCE)/ 2                                       | 2010-2016              | Yin et al. (2020)                                            |
| TD (GOSAT 7.2 Leicester v2)                    | LMDZ_PYVAR (LSCE)/ 4                                       | 2010-2016              | Yin et al. (2020)                                            |
| TD (GOSAT 7.2 Leicester v2)                    | LMDZ_PYVAR (LSCE)/ 2                                       | 2010-2017              | Zheng et al. (2018)                                          |
| TD (surface stations)                          | MIROC4- ACTM (JAMSTEC)/ 1                                  | 2010-2016              | Patra et al. (2016)                                          |
| TD (surface stations)                          | NICAM-TM (NIES)/ 1                                         | 2000-2017              | Niwal et al. (2017)                                          |
| TD (surface stations)                          | NIES-TM-FLEXPART-VAR (NETFVAR), (NIES)/ 1                  | 2010-2017              | Maksyutov et al. (2020); Wang et al. (2019)                  |
| TD (GOSAT NIES L2 v2.72)                       | NIES-TM-FLEXPART-VAR (NETFVAR), (NIES)/ 1                  | 2010-2017              | Maksyutov et al. (2020); Wang et al. (2019)                  |
| TD (surface stations)                          | TM5-CAMS (TNO)/1                                           | 2000-2017              | Segers and Houweling (2018), Bergamaschi et al. (2013, 2018) |
| TD (GOSAT/CCI v2.3.8 and surface observations) | TM5-CAMS (TNO)/1                                           | 2010-2017              | Segers and Houweling (2018), Bergamaschi et al. (2013, 2018) |
| TD (surface stations)                          | TM5-4DVAR (EC_JRC)/2                                       | 2000-2017              | Bergamaschi et al. (2013, 2018)                              |
| TD (GOSAT/CCI v2.3.8 and surface observations) | TM5-4DVAR(EC_JRC)/2                                        | 2010-2017              | Bergamaschi et al. (2013, 2018)                              |
| TD (surface stations)                          | TOMCAT (University of Leeds)/                              | 2003-2015              | McNorton (2018)                                              |

208

209

210

211

212 **Table S8. Data sources for total N<sub>2</sub>O inverse flux over Africa (in situ).**

| <b>Method</b> | <b>Product type / file name</b> | <b>Period covered</b> | <b>References</b>                          |
|---------------|---------------------------------|-----------------------|--------------------------------------------|
| TD            | PyVAR                           | 1998-2017             | Thompson et al. (2014), Tian et al. (2020) |
| TD            | TOMCAT- INVICAT                 | 1998-2015             | Wilson et al. (2014), Tian et al. (2020)   |
| TD            | MIROC4- ACTM (JAMSTEC)          | 1998-2016             | Patra et al. (2018), Tian et al. (2020)    |

213  
214  
215  
216  
217  
218  
219  
220  
221  
222  
223  
224  
225  
226  
227  
228  
229  
230  
231  
232  
233  
234  
235  
236  
237  
238  
239  
240  
241

242  
243

**Table S9. Area of managed land reported in NC/BUR/REDD+ versus FAO forest land (2015) and FAO forest land + other woodlands (2015) for Africa.**

| Country         | Forest area in Mha. Data: FAO (2015) | Inventories forest area in Mha. Data: UNFCCC/REDD+ | Forest land area + other woodland area in Mha. Data : FAO (2015) |
|-----------------|--------------------------------------|----------------------------------------------------|------------------------------------------------------------------|
| Mauritius       | 0.04                                 | 0.00                                               | 0.05                                                             |
| Rwanda          | 0.27                                 | 0.00                                               | 0.53                                                             |
| Cape Verde      | 0.04                                 | 0.04                                               | 0.08                                                             |
| Burundi         | 0.28                                 | 0.71                                               | 0.28                                                             |
| Togo            | 1.22                                 | 1.00                                               | 3.33                                                             |
| Eritrea         | 1.07                                 | 1.59                                               | 7.03                                                             |
| Algeria         | 1.96                                 | 2.14                                               | 4.53                                                             |
| Guinea-Bissau   | 2.02                                 | 2.46                                               | 2.19                                                             |
| Eq. Guinea      | 2.49                                 | 2.50                                               | 2.49                                                             |
| Mauritania      | 0.34                                 | 3.00                                               | 2.74                                                             |
| Côte d'Ivoire   | 3.40                                 | 3.40                                               | 5.96                                                             |
| Benin           | 3.39                                 | 3.59                                               | 5.34                                                             |
| Liberia         | 7.77                                 | 4.52                                               | 8.07                                                             |
| Guinea          | 6.39                                 | 4.60                                               | 12.24                                                            |
| Kenya           | 3.52                                 | 4.75                                               | 35.14                                                            |
| Botswana        | 15.85                                | 5.83                                               | 42.34                                                            |
| Morocco         | 5.68                                 | 6.00                                               | 6.97                                                             |
| Namibia         | 6.99                                 | 7.00                                               | 61.07                                                            |
| Niger           | 1.14                                 | 8.00                                               | 4.28                                                             |
| Ghana           | 7.88                                 | 8.97                                               | 7.88                                                             |
| Madagascar      | 12.50                                | 9.00                                               | 26.96                                                            |
| Malawi          | 2.45                                 | 9.00                                               | 2.45                                                             |
| Nigeria         | 22.44                                | 14.00                                              | 22.44                                                            |
| Senegal         | 8.27                                 | 14.00                                              | 13.42                                                            |
| Zimbabwe        | 17.67                                | 16.00                                              | 25.13                                                            |
| Ethiopia        | 17.43                                | 17.43                                              | 39.83                                                            |
| Gabon           | 23.59                                | 18.27                                              | 23.59                                                            |
| Cameroon        | 20.62                                | 20.00                                              | 33.34                                                            |
| South Africa    | 17.23                                | 23.00                                              | 66.91                                                            |
| Congo           | 22.02                                | 23.52                                              | 26.39                                                            |
| Burkina Faso    | 6.47                                 | 27.30                                              | 16.45                                                            |
| Mozambique      | 37.94                                | 34.00                                              | 52.36                                                            |
| Tanzania        | 48.09                                | 48.00                                              | 63.38                                                            |
| Zambia          | 45.76                                | 48.00                                              | 58.97                                                            |
| Angola          | 69.38                                | 53.00                                              | 95.31                                                            |
| Sudan           | 19.21                                | 70.00                                              | 39.96                                                            |
| Dem. Rep. Congo | 131.66                               | 152.00                                             | 143.17                                                           |

244

Comparison of UNFCCC vs. FAO forest land area and FAO forest + other wood land (year 2015) in Mha

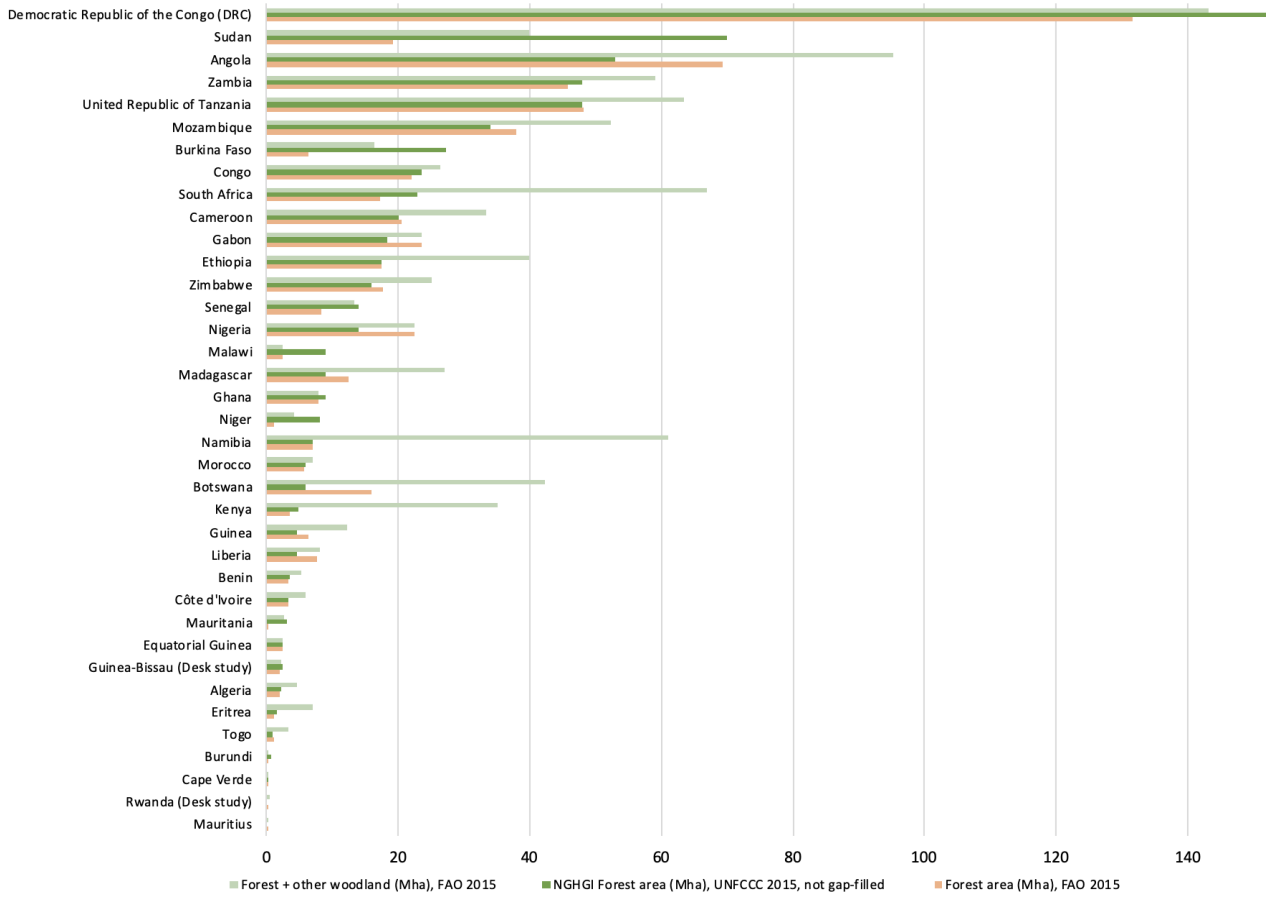

246 **Figure S10. Bar plots comparing areas of managed land reported in Mha for NC/BUR/REDD+ versus FAO forest land**  
 247 **(2015) in Mha and FAO forest land + other woodlands areas (2015) for African countries. (Source: Forest Resource**  
 248 **Assessment, FAO). See also Table S7 for detailed values.**

249  
 250  
 251  
 252  
 253  
 254  
 255  
 256  
 257  
 258  
 259  
 260  
 261  
 262  
 263

264 **Table S10. Synthesis of TD and BU mean CH<sub>4</sub> emissions and removals in MtCO<sub>2</sub>e.yr<sup>-1</sup> for the overlapping time series**  
 265 **(2010-2017) for whole Africa and for the six groups using Method 1 (Foss+ AGRIW + BBUR - wildfires).**

| <b>Region</b>                  | <b>Rank median PRIMAP</b> | <b>Rank median GOSAT</b> | <b>Rank median surface inversions</b> | <b>Rank wetlands median GMB</b> | <b>Rank wildfires</b> | <b>Rank wetlands median GMB</b> |
|--------------------------------|---------------------------|--------------------------|---------------------------------------|---------------------------------|-----------------------|---------------------------------|
| <b>North Africa</b>            | <b>1</b>                  | <b>1</b>                 | <b>1</b>                              | <b>5</b>                        | <b>3</b>              | <b>5</b>                        |
| <b>Subsahelian West Africa</b> | <b>2</b>                  | <b>3</b>                 | <b>2</b>                              | <b>4</b>                        | <b>5</b>              | <b>4</b>                        |
| <b>Horn of Africa</b>          | <b>3</b>                  | <b>2</b>                 | <b>3</b>                              | <b>3</b>                        | <b>4</b>              | <b>3</b>                        |
| <b>Southern Africa</b>         | <b>4</b>                  | <b>5</b>                 | <b>5</b>                              | <b>2</b>                        | <b>1</b>              | <b>2</b>                        |
| <b>Central Africa</b>          | <b>5</b>                  | <b>4</b>                 | <b>4</b>                              | <b>1</b>                        | <b>2</b>              | <b>1</b>                        |
| <b>South Africa Group</b>      | <b>6</b>                  | <b>6</b>                 | <b>6</b>                              | <b>6</b>                        | <b>6</b>              | <b>6</b>                        |

266  
 267  
 268  
 269  
 270  
 271  
 272  
 273  
 274  
 275  
 276  
 277  
 278  
 279  
 280  
 281  
 282  
 283  
 284  
 285  
 286  
 287  
 288  
 289  
 290  
 291  
 292  
 293  
 294  
 295  
 296  
 297  
 298  
 299

300 **Table S11. Anomalies in ranking for TD and BU mean values on the overlapping time periods (2010-2017) for whole**  
 301 **Africa, and for six African groups using Method 1 for anthropogenic CH<sub>4</sub> (FOSS + AGRIW + BBUR - wildfires) in**  
 302 **MtCO<sub>2</sub>e.yr<sup>-1</sup>.**

| <b>Region</b>                  | <b>PRIMAP</b> | <b>Median GOSAT inv.</b> | <b>Max GOSAT inv.</b> | <b>Min GOSAT inv.</b> | <b>Median surface inv.</b> | <b>Max surface inv.</b> | <b>Min surface inv.</b> | <b>Max wetlands GCB</b> | <b>Median wetlands GCB</b> | <b>Min wetlands GCB</b> | <b>Wildfires</b> |
|--------------------------------|---------------|--------------------------|-----------------------|-----------------------|----------------------------|-------------------------|-------------------------|-------------------------|----------------------------|-------------------------|------------------|
| <b>Africa Total</b>            | 1231          | 1117                     | 1390                  | 903                   | 1094                       | 1330                    | 853                     | 946                     | 827                        | 481                     | 110              |
| <b>North Africa</b>            | 293           | 270                      | 330                   | 174                   | 302                        | 396                     | 245                     | 146                     | 69                         | 34                      | 11               |
| <b>Subsahelian West Africa</b> | 272           | 186                      | 329                   | 174                   | 249                        | 396                     | 245                     | 161                     | 77                         | 48                      | 8                |
| <b>Horn of Africa</b>          | 252           | 242                      | 551                   | 206                   | 237                        | 302                     | 183                     | 171                     | 86                         | 47                      | 9                |
| <b>Southern Africa</b>         | 212           | 114                      | 173                   | 99                    | 114                        | 146                     | 91                      | 214                     | 102                        | 65                      | 41               |
| <b>Central Africa</b>          | 123           | 130                      | 170                   | 106                   | 123                        | 142                     | 88                      | 615                     | 428                        | 195                     | 40               |
| <b>South Africa Group</b>      | 78            | 91                       | 168                   | 75                    | 88                         | 124                     | 65                      | 21                      | 13                         | 2                       | 1                |

303  
 304  
 305 **Table S12. Synthesis of wetlands (GCB) mean CH<sub>4</sub> emissions and removals in MtCO<sub>2</sub>e.yr<sup>-1</sup> for the overlapping time**  
 306 **series (2010-2017) for the whole Africa and six African groups.**

| <b>Region</b>                  | <b>Max wetlands GCB</b> | <b>Median wetlands GCB</b> | <b>Min wetlands GCB</b> |
|--------------------------------|-------------------------|----------------------------|-------------------------|
| <b>Africa</b>                  | 946                     | 827                        | 481                     |
| <b>North Africa</b>            | 146                     | 69                         | 34                      |
| <b>Subsahelian West Africa</b> | 161                     | 77                         | 48                      |
| <b>Horn of Africa</b>          | 171                     | 86                         | 47                      |
| <b>Southern Africa</b>         | 214                     | 102                        | 65                      |
| <b>Central Africa</b>          | 615                     | 428                        | 195                     |
| <b>South Africa group</b>      | 21                      | 13                         | 2                       |

307



308 Table S13. Comparison between N<sub>2</sub>O PRIMAP-hist mean values and the median of inversions on the overlapping  
 309 period (2010-2017) for Africa and the six African groups in MtCO<sub>2</sub>e.yr<sup>-1</sup>.

| Region                  | PRIMAP-hist | Median global inversions |
|-------------------------|-------------|--------------------------|
| Africa total            | 360         | 1647<br>(1502 to 1760)   |
| North Africa            | 106         | 330<br>(274 to 419)      |
| Subsahelian West Africa | 68          | 271<br>(68 to 330)       |
| Horn of Africa          | 46          | 240<br>(217 to 265)      |
| Southern Africa         | 62          | 263<br>(214 to 310)      |
| Central Africa          | 182         | 461<br>(424 to 517)      |
| South Africa group      | 24          | 68<br>(51 to 81)         |

310

311 Table S14. Synthesis for the three main GHGs net African budget: comparative net emissions and removals  
 312 computation by TD methods for Africa as a whole and for six sub-groups of African countries over the overlapping  
 313 period (2001-2017), in MtCO<sub>2</sub>e. Use of Method 1 for CH<sub>4</sub> (FOS+AGRIW+BBUR-wildfires) excluding UNFCCC  
 314 outliers, and including the range for GCP CO<sub>2</sub> LULUCF.  
 315

| Region                  | TD Method 1 and GCP for FCO <sub>2</sub>                                     |                                                                             |                                                                  |                                                                   | TD Method 1 and PRIMAP for FCO <sub>2</sub>                                  |                                                                             |                                                                  |                                                                   |
|-------------------------|------------------------------------------------------------------------------|-----------------------------------------------------------------------------|------------------------------------------------------------------|-------------------------------------------------------------------|------------------------------------------------------------------------------|-----------------------------------------------------------------------------|------------------------------------------------------------------|-------------------------------------------------------------------|
|                         | CH <sub>4</sub> median GOSAT inversions + median N <sub>2</sub> O inversions | CH <sub>4</sub> median SURF inversions + median N <sub>2</sub> O inversions | CH <sub>4</sub> median SURF inversions + PRIMAP N <sub>2</sub> O | CH <sub>4</sub> median GOSAT inversions + PRIMAP N <sub>2</sub> O | CH <sub>4</sub> median GOSAT inversions + median N <sub>2</sub> O inversions | CH <sub>4</sub> median SURF inversions + median N <sub>2</sub> O inversions | CH <sub>4</sub> median SURF inversions + PRIMAP N <sub>2</sub> O | CH <sub>4</sub> median GOSAT inversions + PRIMAP N <sub>2</sub> O |
| Africa total            | 3889 <sup>7257</sup> <sub>1296</sub>                                         | 3866 <sup>7197</sup> <sub>1246</sub>                                        | 2579 <sup>5797</sup> <sub>104</sub>                              | 2602 <sup>5857</sup> <sub>154</sub>                               | 3983 <sup>7621</sup> <sub>1390</sub>                                         | 3960 <sup>7291</sup> <sub>1340</sub>                                        | 2673 <sup>5890</sup> <sub>198</sub>                              | 2696 <sup>5950</sup> <sub>248</sub>                               |
| North Africa            | 1014 <sup>1438</sup> <sub>553</sub>                                          | 1046 <sup>1504</sup> <sub>624</sub>                                         | 822 <sup>1190</sup> <sub>456</sub>                               | 790 <sup>1124</sup> <sub>385</sub>                                | 1022 <sup>1446</sup> <sub>591</sub>                                          | 1054 <sup>1511</sup> <sub>632</sub>                                         | 830 <sup>1232</sup> <sub>464</sub>                               | 798 <sup>1132</sup> <sub>393</sub>                                |
| Central Africa          | 758 <sup>2064</sup> <sub>758</sub>                                           | 751 <sup>2036</sup> <sub>776</sub>                                          | 344 <sup>1573</sup> <sub>1145</sub>                              | 351 <sup>1602</sup> <sub>1128</sub>                               | 766 <sup>2072</sup> <sub>750</sub>                                           | 759 <sup>2043</sup> <sub>768</sub>                                          | 352 <sup>1582</sup> <sub>1138</sub>                              | 359 <sup>1610</sup> <sub>1120</sub>                               |
| Subsahelian West Africa | 546 <sup>1282</sup> <sub>95</sub>                                            | 609 <sup>1349</sup> <sub>24</sub>                                           | 406 <sup>1086</sup> <sub>24</sub>                                | 343 <sup>1019</sup> <sub>95</sub>                                 | 542 <sup>1278</sup> <sub>98</sub>                                            | 605 <sup>1345</sup> <sub>27</sub>                                           | 403 <sup>1083</sup> <sub>27</sub>                                | 340 <sup>1016</sup> <sub>98</sub>                                 |
| Southern Africa         | 616 <sup>1726</sup> <sub>175</sub>                                           | 616 <sup>1699</sup> <sub>186</sub>                                          | 415 <sup>1451</sup> <sub>338</sub>                               | 415 <sup>1478</sup> <sub>331</sub>                                | 618 <sup>1728</sup> <sub>340</sub>                                           | 618 <sup>1701</sup> <sub>348</sub>                                          | 416 <sup>1452</sup> <sub>337</sub>                               | 416 <sup>1479</sup> <sub>329</sub>                                |
| South Africa group      | 458 <sup>710</sup> <sub>103</sub>                                            | 455 <sup>747</sup> <sub>93</sub>                                            | 411 <sup>689</sup> <sub>116</sub>                                | 414 <sup>734</sup> <sub>126</sub>                                 | 537 <sup>871</sup> <sub>184</sub>                                            | 534 <sup>927</sup> <sub>172</sub>                                           | 490 <sup>769</sup> <sub>196</sub>                                | 493 <sup>813</sup> <sub>206</sub>                                 |
| Horn of Africa          | 399 <sup>1215</sup> <sub>274</sub>                                           | 394 <sup>966</sup> <sub>297</sub>                                           | 201 <sup>748</sup> <sub>467</sub>                                | 206 <sup>997</sup> <sub>444</sub>                                 | 401 <sup>1216</sup> <sub>273</sub>                                           | 395 <sup>967</sup> <sub>296</sub>                                           | 202 <sup>749</sup> <sub>467</sub>                                | 207 <sup>998</sup> <sub>444</sub>                                 |

316

317

318

319  
 320  
 321  
 322  
 323  
 324  
 325  
 326  
 327  
 328  
 329  
 330  
 331  
 332  
 333  
 334  
 335  
 336  
 337

Table S15. Synthesis for the three main GHGs net African budget: comparative net emissions and removals computation by TD methods for Africa as a whole and for six sub-groups of African countries over the overlapping period (2001-2017), in MtCO<sub>2</sub>e. Use of Method 1 for CH<sub>4</sub> (FOS+AGRIW+BBUR-wildfires) excluding UNFCCC outliers, and excluding the range for GCP CO<sub>2</sub> LULUCF (possible outliers).

| Region                         | TD Method 1 and GCP FCO <sub>2</sub>                                         |                                                                             |                                                                  |                                                                   | TD Method 1 and PRIMAP FCO <sub>2</sub>                                      |                                                                             |                                                                  |                                                                   |
|--------------------------------|------------------------------------------------------------------------------|-----------------------------------------------------------------------------|------------------------------------------------------------------|-------------------------------------------------------------------|------------------------------------------------------------------------------|-----------------------------------------------------------------------------|------------------------------------------------------------------|-------------------------------------------------------------------|
|                                | CH <sub>4</sub> median GOSAT inversions + median N <sub>2</sub> O inversions | CH <sub>4</sub> median SURF inversions + median N <sub>2</sub> O inversions | CH <sub>4</sub> median SURF inversions + PRIMAP N <sub>2</sub> O | CH <sub>4</sub> median GOSAT inversions + PRIMAP N <sub>2</sub> O | CH <sub>4</sub> median GOSAT inversions + median N <sub>2</sub> O inversions | CH <sub>4</sub> median SURF inversions + median N <sub>2</sub> O inversions | CH <sub>4</sub> median SURF inversions + PRIMAP N <sub>2</sub> O | CH <sub>4</sub> median GOSAT inversions + PRIMAP N <sub>2</sub> O |
| <b>Africa total</b>            | 3889 <sup>4276</sup> <sub>3530</sub>                                         | 3866 <sup>4216</sup> <sub>3480</sub>                                        | 2579 <sup>2815</sup> <sub>2338</sub>                             | 2602 <sup>2875</sup> <sub>2388</sub>                              | 3983 <sup>4639</sup> <sub>3624</sub>                                         | 3960 <sup>4309</sup> <sub>3574</sub>                                        | 2673 <sup>2909</sup> <sub>2432</sub>                             | 2696 <sup>2969</sup> <sub>2482</sub>                              |
| <b>North Africa</b>            | 1014 <sup>1164</sup> <sub>862</sub>                                          | 1046 <sup>1230</sup> <sub>933.1</sub>                                       | 822 <sup>916</sup> <sub>765</sub>                                | 790 <sup>850</sup> <sub>694</sub>                                 | 1022 <sup>1171</sup> <sub>870</sub>                                          | 1054 <sup>1237</sup> <sub>941</sub>                                         | 830 <sup>958</sup> <sub>773</sub>                                | 798 <sup>858</sup> <sub>702</sub>                                 |
| <b>Central Africa</b>          | 758 <sup>853</sup> <sub>697</sub>                                            | 751 <sup>826</sup> <sub>679</sub>                                           | 344 <sup>363</sup> <sub>309</sub>                                | 351 <sup>391</sup> <sub>327</sub>                                 | 766 <sup>862</sup> <sub>705</sub>                                            | 759 <sup>833</sup> <sub>687</sub>                                           | 352 <sup>371</sup> <sub>317</sub>                                | 359 <sup>399</sup> <sub>335</sub>                                 |
| <b>Subsahelian West Africa</b> | 546 <sup>748</sup> <sub>331</sub>                                            | 609 <sup>815</sup> <sub>402</sub>                                           | 406 <sup>553</sup> <sub>402</sub>                                | 343 <sup>486</sup> <sub>331</sub>                                 | 542 <sup>745</sup> <sub>328</sub>                                            | 605 <sup>812</sup> <sub>399</sub>                                           | 403 <sup>550</sup> <sub>399</sub>                                | 340 <sup>483</sup> <sub>328</sub>                                 |
| <b>Southern Africa</b>         | 616 <sup>722</sup> <sub>552</sub>                                            | 616 <sup>695</sup> <sub>544</sub>                                           | 415 <sup>447</sup> <sub>392</sub>                                | 415 <sup>474</sup> <sub>400</sub>                                 | 618 <sup>724</sup> <sub>390</sub>                                            | 618 <sup>697</sup> <sub>382</sub>                                           | 416 <sup>448</sup> <sub>393</sub>                                | 416 <sup>475</sup> <sub>401</sub>                                 |
| <b>South Africa group</b>      | 458 <sup>467</sup> <sub>374</sub>                                            | 455 <sup>504</sup> <sub>364</sub>                                           | 411 <sup>446</sup> <sub>388</sub>                                | 414 <sup>491</sup> <sub>398</sub>                                 | 537 <sup>628</sup> <sub>453</sub>                                            | 534 <sup>584</sup> <sub>443</sub>                                           | 490 <sup>526</sup> <sub>467</sub>                                | 493 <sup>570</sup> <sub>477</sub>                                 |
| <b>Horn of Africa</b>          | 399 <sup>733</sup> <sub>340</sub>                                            | 394 <sup>484</sup> <sub>317</sub>                                           | 201 <sup>266</sup> <sub>147</sub>                                | 206 <sup>515</sup> <sub>179</sub>                                 | 400 <sup>734</sup> <sub>341</sub>                                            | 395 <sup>485</sup> <sub>318</sub>                                           | 202 <sup>267</sup> <sub>148</sub>                                | 207 <sup>516</sup> <sub>171</sub>                                 |

338 **Table S16. Mean net total Africa and regional groups from mean TD (excluding the range for CO<sub>2</sub> LULUCF due to**  
 339 **outliers) and mean best fitted BU Methods excluding outliers. (For TD approaches, N<sub>2</sub>O inversions were excluded and**  
 340 **replaced by PRIMAP estimates. For DGVMs the range for GCP CO<sub>2</sub> LULUCF was not considered due to probable**  
 341 **outliers. UNFCCC outliers are also excluded.) Net emissions and removals are expressed in MtCO<sub>2</sub>e.yr<sup>-1</sup> over the**  
 342 **overlapping period (2001-2017).**

| Region                             | Mean of TD methods<br>excluding N <sub>2</sub> O inversions replaced<br>with N <sub>2</sub> O PRIMAP and excluding the<br>range for GCP CO <sub>2</sub> LULUCF (with<br>probable outliers)                        | Ranking<br>with TD<br>methods | Mean net of best fitted BU methods<br>(excluding uncorrected UNFCCC data)                                                                                                                                         | Ranking with BU<br>methods |
|------------------------------------|-------------------------------------------------------------------------------------------------------------------------------------------------------------------------------------------------------------------|-------------------------------|-------------------------------------------------------------------------------------------------------------------------------------------------------------------------------------------------------------------|----------------------------|
| <b>North Africa</b>                | 806 <sup>883</sup> <sub>730</sub> (GCP FCO <sub>2</sub> )<br>814 <sup>908</sup> <sub>737</sub> (PRIMAP FCO <sub>2</sub> )<br>Mean GCP & PRIMAP (FCO <sub>2</sub> ):<br>810 <sup>895</sup> <sub>733</sub>          | 1                             | 713 <sup>807</sup> <sub>641</sub> (GCP FCO <sub>2</sub> )<br>720 <sup>816</sup> <sub>649</sub> (PRIMAP FCO <sub>2</sub> )<br>Mean GCP & PRIMAP (FCO <sub>2</sub> ):<br>717 <sup>812</sup> <sub>645</sub>          | 1                          |
| <b>South Africa group</b>          | 412 <sup>468</sup> <sub>393</sub> (GCP FCO <sub>2</sub> )<br>491 <sup>547</sup> <sub>472</sub> (PRIMAP FCO <sub>2</sub> )<br>Mean GCP & PRIMAP (FCO <sub>2</sub> ):<br>452 <sup>508</sup> <sub>432</sub>          | 2                             | 534 <sup>613</sup> <sub>443</sub> (GCP FCO <sub>2</sub> )<br>613 <sup>692</sup> <sub>522</sub> (PRIMAP FCO <sub>2</sub> )<br>Mean GCP & PRIMAP (FCO <sub>2</sub> ):<br>574 <sup>653</sup> <sub>483</sub>          | 3                          |
| <b>Horn of Africa</b>              | 203 <sup>390</sup> <sub>158</sub> (GCP FCO <sub>2</sub> )<br>204 <sup>391</sup> <sub>159</sub> (PRIMAP FCO <sub>2</sub> )<br>Mean GCP & PRIMAP (FCO <sub>2</sub> ):<br>204 <sup>391</sup> <sub>159</sub>          | 6                             | 432 <sup>524</sup> <sub>296</sub> (GCP FCO <sub>2</sub> )<br>433 <sup>525</sup> <sub>297</sub> (PRIMAP FCO <sub>2</sub> )<br>Mean GCP & PRIMAP (FCO <sub>2</sub> ):<br>433 <sup>525</sup> <sub>297</sub>          | 4                          |
| <b>Subsahelian West<br/>Africa</b> | 375 <sup>520</sup> <sub>367</sub> (GCP FCO <sub>2</sub> )<br>371 <sup>516</sup> <sub>363</sub> (PRIMAP FCO <sub>2</sub> )<br>Mean GCP & PRIMAP (FCO <sub>2</sub> ):<br>373 <sup>518</sup> <sub>365</sub>          | 4                             | 612 <sup>776</sup> <sub>539</sub> (GCP FCO <sub>2</sub> )<br>609 <sup>772</sup> <sub>535</sub> (PRIMAP FCO <sub>2</sub> )<br>Mean GCP & PRIMAP (FCO <sub>2</sub> ):<br>610 <sup>774</sup> <sub>537</sub>          | 2                          |
| <b>Southern Africa</b>             | 415 <sup>460</sup> <sub>396</sub> (GCP FCO <sub>2</sub> )<br>416 <sup>462</sup> <sub>397</sub> (PRIMAP FCO <sub>2</sub> )<br>Mean GCP & PRIMAP (FCO <sub>2</sub> ):<br>416 <sup>461</sup> <sub>397</sub>          | 3                             | 228 <sup>529</sup> <sub>378</sub> (GCP FCO <sub>2</sub> )<br>355 <sup>531</sup> <sub>179</sub> (PRIMAP FCO <sub>2</sub> )<br>Mean GCP & PRIMAP (FCO <sub>2</sub> ):<br>292 <sup>530</sup> <sub>178</sub>          | 5                          |
| <b>Central Africa</b>              | 348 <sup>377</sup> <sub>318</sub> (GCP FCO <sub>2</sub> )<br>356 <sup>385</sup> <sub>326</sub> (PRIMAP FCO <sub>2</sub> )<br>Mean GCP & PRIMAP (FCO <sub>2</sub> ):<br>352 <sup>381</sup> <sub>322</sub>          | 5                             | -70 <sup>168</sup> <sub>-210</sub> (GCP FCO <sub>2</sub> )<br>-62 <sup>176</sup> <sub>-202</sub> (PRIMAP FCO <sub>2</sub> )<br>Mean GCP & PRIMAP (FCO <sub>2</sub> ):<br>-66 <sup>172</sup> <sub>-206</sub>       | 6                          |
| <b>Africa total</b>                | 2591 <sup>2845</sup> <sub>2363</sub> (GCP FCO <sub>2</sub> )<br>2684 <sup>2939</sup> <sub>2457</sub> (PRIMAP FCO <sub>2</sub> )<br>Mean GCP & PRIMAP (FCO <sub>2</sub> ):<br>2638 <sup>2892</sup> <sub>2410</sub> |                               | 2576 <sup>3228</sup> <sub>2140</sub> (GCP FCO <sub>2</sub> )<br>2669 <sup>3251</sup> <sub>2233</sub> (PRIMAP FCO <sub>2</sub> )<br>Mean GCP & PRIMAP (FCO <sub>2</sub> ):<br>2623 <sup>3240</sup> <sub>2186</sub> |                            |

343  
344  
345  
346  
347  
348  
349  
350  
351

352 Table S17. Mean net total Africa and regional groups from best fitted mean TD and mean BU Methods excluding outliers.  
 353 For TD approaches, N<sub>2</sub>O inversions were excluded and replaced by PRIMAP estimates. For DGVMs, the range for GCP  
 354 CO<sub>2</sub> LULUCF was considered. UNFCCC outliers are also excluded. Net emissions and removals are expressed in MtCO<sub>2</sub>.yr<sup>-1</sup>  
 355 <sup>1</sup> over the overlapping period (2001-2017).

| Region                             | Mean net of TD methods<br>(including range for CO <sub>2</sub><br>LULUCF from GCP inversions<br>with outliers but excluding N <sub>2</sub> O<br>inversions (N <sub>2</sub> O PRIMAP)                              | Ranking with TD<br>methods | Mean net of best fitted BU<br>methods<br>(excluding uncorrected UNFCCC<br>data)                                                                                                                                   | Ranking with BU<br>methods |
|------------------------------------|-------------------------------------------------------------------------------------------------------------------------------------------------------------------------------------------------------------------|----------------------------|-------------------------------------------------------------------------------------------------------------------------------------------------------------------------------------------------------------------|----------------------------|
| <b>North Africa</b>                | 806 <sup>1157</sup> <sub>129</sub> (GCP FCO <sub>2</sub> )<br>814 <sup>1182</sup> <sub>428</sub> (PRIMAP FCO <sub>2</sub> )<br>Mean GCP & PRIMAP:<br>810 <sup>1170</sup> <sub>279</sub>                           | 1                          | 713 <sup>807</sup> <sub>641</sub> (GCP FCO <sub>2</sub> )<br>720 <sup>816</sup> <sub>649</sub> (PRIMAP FCO <sub>2</sub> )<br>Mean GCP & PRIMAP<br>(FCO <sub>2</sub> ):<br>717 <sup>812</sup> <sub>645</sub>       | 1                          |
| <b>South Africa<br/>group</b>      | 412 <sup>712</sup> <sub>121</sub> (GCP FCO <sub>2</sub> )<br>491 <sup>791</sup> <sub>201</sub> (PRIMAP FCO <sub>2</sub> )<br>Mean GCP & PRIMAP:<br>452 <sup>751</sup> <sub>161</sub>                              | 2                          | 534 <sup>613</sup> <sub>443</sub> (GCP FCO <sub>2</sub> )<br>613 <sup>692</sup> <sub>522</sub> (PRIMAP FCO <sub>2</sub> )<br>Mean GCP & PRIMAP (FCO <sub>2</sub> ):<br>574 <sup>653</sup> <sub>483</sub>          | 3                          |
| <b>Horn of Africa</b>              | 203 <sup>872</sup> <sub>-456</sub> (GCP FCO <sub>2</sub> )<br>204 <sup>873</sup> <sub>-455</sub> (PRIMAP FCO <sub>2</sub> )<br>Mean GCP & PRIMAP:<br>204 <sup>873</sup> <sub>-456</sub>                           | 6                          | 432 <sup>524</sup> <sub>296</sub> (GCP FCO <sub>2</sub> )<br>433 <sup>525</sup> <sub>297</sub> (PRIMAP FCO <sub>2</sub> )<br>Mean GCP & PRIMAP (FCO <sub>2</sub> ):<br>433 <sup>525</sup> <sub>296</sub>          | 4                          |
| <b>Subsahelian West<br/>Africa</b> | 375 <sup>1053</sup> <sub>36</sub> (GCP FCO <sub>2</sub> )<br>371 <sup>1050</sup> <sub>36</sub> (PRIMAP FCO <sub>2</sub> )<br>Mean GCP & PRIMAP:<br>373 <sup>1051</sup> <sub>356</sub>                             | 4                          | 612 <sup>776</sup> <sub>539</sub> (GCP FCO <sub>2</sub> )<br>609 <sup>772</sup> <sub>535</sub> (PRIMAP FCO <sub>2</sub> )<br>Mean GCP & PRIMAP (FCO <sub>2</sub> ):<br>610 <sup>774</sup> <sub>537</sub>          | 2                          |
| <b>Southern Africa</b>             | 415 <sup>1464</sup> <sub>-335</sub> (GCP FCO <sub>2</sub> )<br>416 <sup>1466</sup> <sub>-333</sub> (PRIMAP FCO <sub>2</sub> )<br>Mean GCP & PRIMAP:<br>416 <sup>1465</sup> <sub>-334</sub>                        | 3                          | 228 <sup>529</sup> <sub>178</sub> (GCP FCO <sub>2</sub> )<br>355 <sup>531</sup> <sub>179</sub> (PRIMAP FCO <sub>2</sub> )<br>Mean GCP & PRIMAP (FCO <sub>2</sub> ):<br>292 <sup>530</sup> <sub>178</sub>          | 5                          |
| <b>Central Africa</b>              | 348 <sup>1588</sup> <sub>-1137</sub> (GCP FCO <sub>2</sub> )<br>356 <sup>1596</sup> <sub>-1129</sub> (PRIMAP FCO <sub>2</sub> )<br>Mean GCP & PRIMAP (FCO <sub>2</sub> ):<br>352 <sup>1592</sup> <sub>-1133</sub> | 5                          | -70 <sup>168</sup> <sub>-210</sub> (GCP FCO <sub>2</sub> )<br>-62 <sup>176</sup> <sub>-202</sub> (PRIMAP FCO <sub>2</sub> )<br>Mean GCP & PRIMAP (FCO <sub>2</sub> ):<br>-66 <sup>172</sup> <sub>-206</sub>       | 6                          |
| <b>Africa total</b>                | 2583 <sup>3037</sup> <sub>251</sub> (GCP FCO <sub>2</sub> )<br>2654 <sup>3089</sup> <sub>2322</sub> (PRIMAP FCO <sub>2</sub> )<br>Mean GCP & PRIMAP (FCO <sub>2</sub> ):<br>2638 <sup>5873</sup> <sub>1761</sub>  |                            | 2576 <sup>3228</sup> <sub>2140</sub> (GCP FCO <sub>2</sub> )<br>2669 <sup>3251</sup> <sub>2233</sub> (PRIMAP FCO <sub>2</sub> )<br>Mean GCP & PRIMAP (FCO <sub>2</sub> ):<br>2623 <sup>3240</sup> <sub>2186</sub> |                            |

356  
 357  
 358  
 359  
 360  
 361  
 362  
 363  
 364  
 365

366 Table S18. Mean net total of best fitted mean TD and mean BU methods excluding N<sub>2</sub>O inversions (replaced by  
 367 PRIMAP estimates), using Method 1 for CH<sub>4</sub> (FOS+AGRIW+BBUR-wildfires) excluding UNFCCC outliers, and  
 368 including the range for GCP CO<sub>2</sub> LULUCF, for Africa total and for regional groups, with associated ranking.

| Region                  | Mean of best fitted TD and BU methods using both GCP and PRIMAP FCO <sub>2</sub><br>(excluding UNFCCC outliers and N <sub>2</sub> O inversions, but including range for CO <sub>2</sub> LULUCF from GCP inversions) | Ranking with TD methods |
|-------------------------|---------------------------------------------------------------------------------------------------------------------------------------------------------------------------------------------------------------------|-------------------------|
| North Africa            | 761 <sup>988</sup> <sub>460</sub>                                                                                                                                                                                   | 1                       |
| South Africa group      | 513 <sup>702</sup> <sub>161</sub>                                                                                                                                                                                   | 2                       |
| Horn of Africa          | 318 <sup>699</sup> <sub>-80</sub>                                                                                                                                                                                   | 5                       |
| Subsahelian West Africa | 492 <sup>913</sup> <sub>286</sub>                                                                                                                                                                                   | 3                       |
| Southern Africa         | 354 <sup>998</sup> <sub>-78</sub>                                                                                                                                                                                   | 4                       |
| Central Africa          | 143 <sup>882</sup> <sub>-670</sub>                                                                                                                                                                                  | 6                       |
| Africa total            | 2630 <sup>4557</sup> <sub>1974</sub>                                                                                                                                                                                |                         |

369  
 370  
 371  
 372  
 373  
 374  
 375  
 376  
 377  
 378  
 379  
 380  
 381  
 382  
 383

384 **Table S19. Mean net total Africa and regional groups from TD inversions only including N<sub>2</sub>O inversions (and the range**  
 385 **for CO<sub>2</sub> LULUCF from GCP inversions). For BU methods, UNFCCC outliers are excluded.**

| Region                  | Mean TD from inversions only<br>(including range for CO <sub>2</sub> LULUCF from GCP inversions<br>and N <sub>2</sub> O inversions)                                                                               | Ranking with BU methods |
|-------------------------|-------------------------------------------------------------------------------------------------------------------------------------------------------------------------------------------------------------------|-------------------------|
| North Africa            | 1030 <sup>1471</sup> <sub>589</sub> (GCP FCO <sub>2</sub> )<br>1038 <sup>1479</sup> <sub>512</sub> (PRIMAP FCO <sub>2</sub> )<br>Mean GCP & PRIMAP (FCO <sub>2</sub> ):<br>1034 <sup>1475</sup> <sub>600</sub>    | 1                       |
| South Africa group      | 457 <sup>729</sup> <sub>98</sub> (GCP FCO <sub>2</sub> )<br>536 <sup>899</sup> <sub>178</sub> (PRIMAP FCO <sub>2</sub> )<br>Mean GCP & PRIMAP (FCO <sub>2</sub> ):<br>496 <sup>814</sup> <sub>138</sub>           | 5                       |
| Horn of Africa          | 397 <sup>1090</sup> <sub>-286</sub> (GCP FCO <sub>2</sub> )<br>398 <sup>1091</sup> <sub>-285</sub> (PRIMAP FCO <sub>2</sub> )<br>Mean GCP & PRIMAP (FCO <sub>2</sub> ):<br>397 <sup>1091</sup> <sub>-285</sub>    | 6                       |
| Subsahelian West Africa | 577 <sup>1315</sup> <sub>-60</sub> (GCP FCO <sub>2</sub> )<br>574 <sup>1312</sup> <sub>-63</sub> (PRIMAP FCO <sub>2</sub> )<br>Mean GCP & PRIMAP (FCO <sub>2</sub> ):<br>576 <sup>1313</sup> <sub>-61</sub>       | 4                       |
| Southern Africa         | 616 <sup>1713</sup> <sub>-181</sub> (GCP FCO <sub>2</sub> )<br>618 <sup>1714</sup> <sub>-344</sub> (PRIMAP FCO <sub>2</sub> )<br>Mean GCP & PRIMAP (FCO <sub>2</sub> ):<br>617 <sup>1713</sup> <sub>-262</sub>    | 3                       |
| Central Africa          | 755 <sup>2050</sup> <sub>-767</sub> (GCP FCO <sub>2</sub> )<br>763 <sup>2058</sup> <sub>-759</sub> (PRIMAP FCO <sub>2</sub> )<br>Mean GCP & PRIMAP (FCO <sub>2</sub> ):<br>759 <sup>2054</sup> <sub>-763</sub>    | 2                       |
| Africa total            | 3787 <sup>7226</sup> <sub>1274</sub> (GCP FCO <sub>2</sub> )<br>3971 <sup>7456</sup> <sub>1365</sub> (PRIMAP FCO <sub>2</sub> )<br>Mean GCP & PRIMAP (FCO <sub>2</sub> ):<br>3879 <sup>7341</sup> <sub>1320</sub> |                         |

386  
387  
388

389

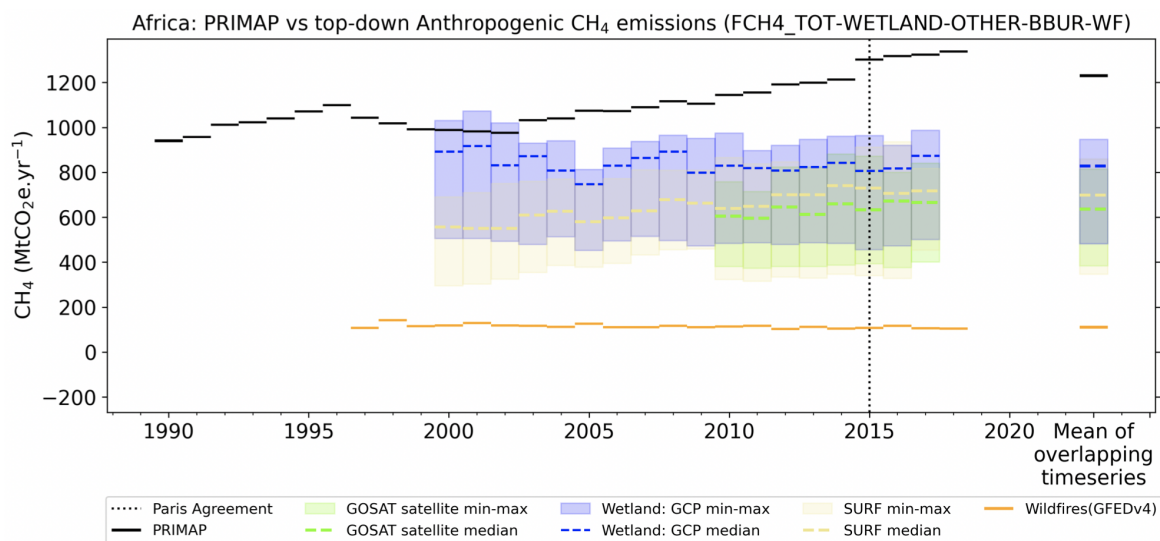

390

391 **Figure S11. Comparison of the total anthropogenic CH<sub>4</sub> emissions from PRIMAP-hist and 22 top-down global**  
 392 **ensembles using Method 2 for total Africa, including wildfire emissions. Anthropogenic CH<sub>4</sub> emissions from TD**  
 393 **TD methods were computed by withdrawing the sum of available data regarding natural emissions from the total flux**  
 394 **(wetlands, “other natural” emissions, biomass burning, and wildfires (GFEDv4)). Black lines denote the PRIMAP-**  
 395 **hist estimates for total anthropogenic emissions including all IPCC sectors. Shaded green areas represent the**  
 396 **minimum and maximum ranges from satellite concentration observations (GOSAT) inversions. Shaded blue areas**  
 397 **represent the minimum and maximum ranges for wetlands. Shaded yellow areas represent the minimum and**  
 398 **maximum ranges for surface stations (SURF). Green dashes denote the median of 11 global GOSAT satellites, blue**  
 399 **dashes denote the median of wetlands, yellow dashes the median of inversions using surface stations (SURF). The**  
 400 **orange lines represent wildfire emissions. Following the atmospheric convention, positive numbers represent an**  
 401 **emission to the atmosphere.**

402

403

404

Proposal for innovative systematic correction methods for non Annex I countries in the face of net GHGs assessment uncertainty under the PA regime.

What is the « true » country net estimate?

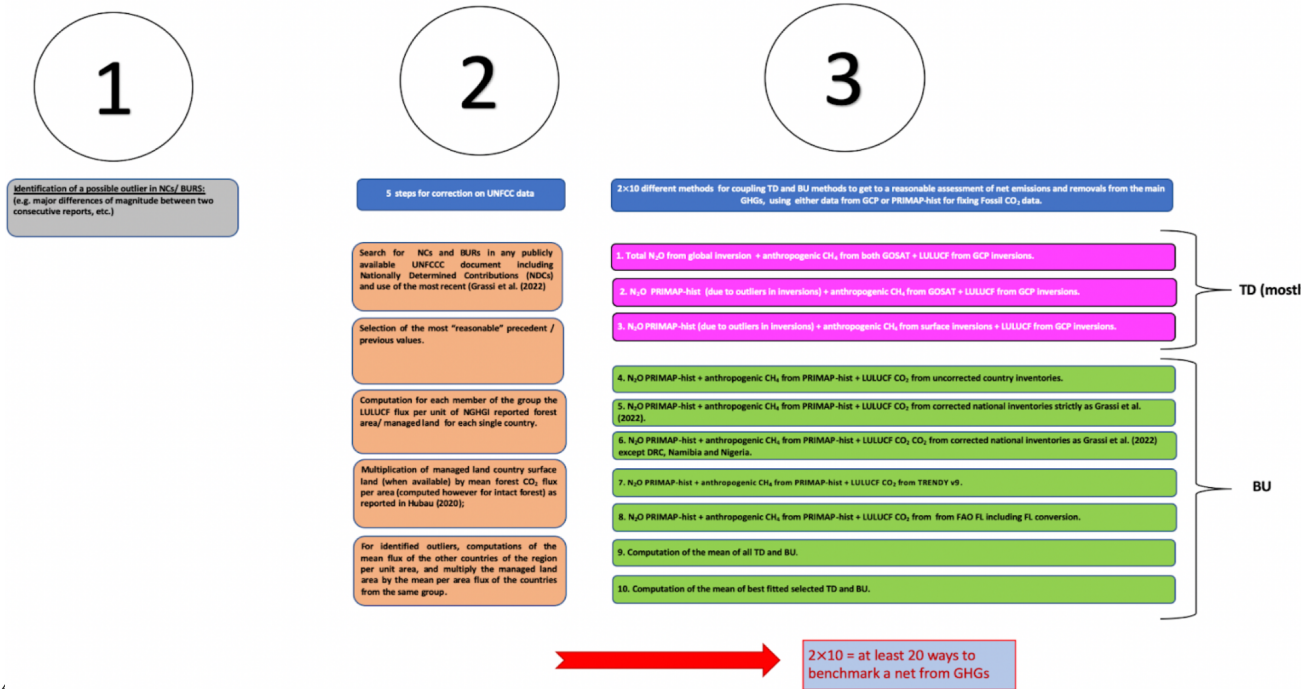

406  
407  
408  
409  
410  
411  
412  
413  
414  
415  
416  
417  
418

Figure S12. Synthesis of the different methodological steps used in this paper for assessing net African GHG trends.



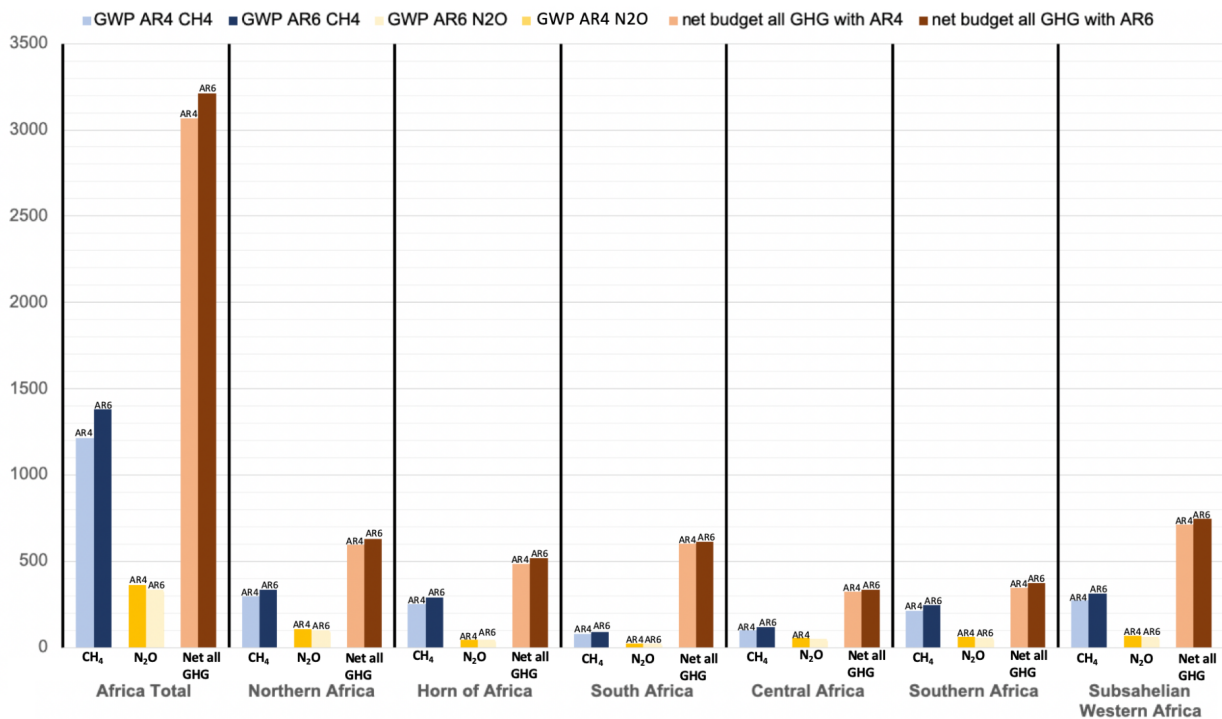

41'  
 420 Figure S13. Differences in MtCO<sub>2</sub>e in the CH<sub>4</sub> emissions, N<sub>2</sub>O emissions and total GHG net budget coming from the use of  
 421 AR4 and AR6 GWP-100 for CH<sub>4</sub> and N<sub>2</sub>O with PRIMAP fossil CO<sub>2</sub> emissions and LULUCF CO<sub>2</sub> for the 6 African regions  
 422 and Africa total, using PRIMAP-hist for fossil CO<sub>2</sub> and UNFCCC data consistent with Grassi et al. (2022).  
 423  
 424  
 425  
 426  
 427  
 428  
 429  
 430

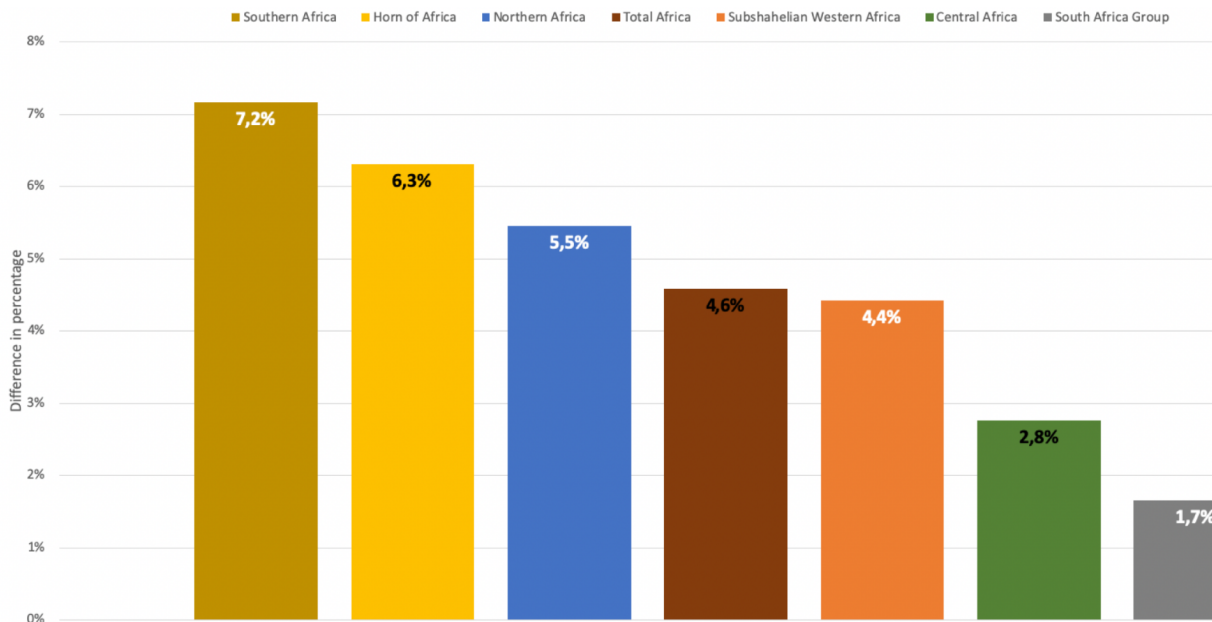

431  
432 **Figure S14. Percentage of difference in the 2001-2018 net budget coming from the difference between the use of AR6 GWP-**  
433 **100 and AR4 GWP-100 for CH<sub>4</sub> and N<sub>2</sub>O, with PRIMAP fossil CO<sub>2</sub> emissions and UNFCCC LULUCF CO<sub>2</sub> (Grassi, 2022)**  
434 **for the 6 African regions and Africa total.**

435  
436  
437 **References**

438  
439 Andrew, R. M.: A comparison of estimates of global carbon dioxide emissions from fossil carbon sources, *Earth Syst. Sci.*  
440 *Data*, 12, 1437–1465, <https://doi.org/10.5194/essd-12-1437-2020>, 2020.

441  
442  
443 Chevallier, F., Fisher, M., Peylin, P., Serrar, S., Bousquet, P., Bréon, F.-M., Chédin, A., and Ciais, P.: Inferring CO<sub>2</sub>  
444 sources and sinks from satellite observations: Method and application to TOVS data, *J. Geophys. Res. Atmospheres*, 110,  
445 <https://doi.org/10.1029/2005JD006390>, 2005.

446  
447 FAO FRA: FAO Global Forests Resource Assessment, available at [fra-data.fao.org](http://fra-data.fao.org), last access: June 2022, 2022.

448  
449 Friedlingstein, P., O’Sullivan, M., Jones, M. W., Andrew, R. M., Hauck, J., Olsen, A., Peters, G. P., Peters, W., Pongratz,  
450 J., Sitch, S., Le Quéré, C., Canadell, J. G., Ciais, P., Jackson, R. B., Alin, S., Aragão, L. E. O. C., Armeth, A., Arora, V.,  
451 Bates, N. R., Becker, M., Benoit-Cattin, A., Bittig, H. C., Bopp, L., Bultan, S., Chandra, N., Chevallier, F., Chini, L. P.,  
452 Evans, W., Florentie, L., Forster, P. M., Gasser, T., Gehlen, M., Gilfillan, D., Gkritzalis, T., Gregor, L., Gruber, N., Harris,  
453 I., Hartung, K., Haverd, V., Houghton, R. A., Ilyina, T., Jain, A. K., Joetzjer, E., Kadono, K., Kato, E., Kitidis, V.,  
454 Korsbakken, J. I., Landschützer, P., Lefèvre, N., Lenton, A., Lienert, S., Liu, Z., Lombardozzi, D., Marland, G., Metzl, N.,  
455 Munro, D. R., Nabel, J. E. M. S., Nakaoka, S.-I., Niwa, Y., O’Brien, K., Ono, T., Palmer, P. I., Pierrot, D., Poulter, B.,  
456 Resplandy, L., Robertson, E., Rödenbeck, C., Schwinger, J., Séférian, R., Skjelvan, I., Smith, A. J. P., Sutton, A. J., Tanhua,

457 T., Tans, P. P., Tian, H., Tilbrook, B., van der Werf, G., Vuichard, N., Walker, A. P., Wanninkhof, R., Watson, A. J.,  
458 Willis, D., Wiltshire, A. J., Yuan, W., Yue, X., and Zaehle, S.: Global Carbon Budget 2020, *Earth Syst. Sci. Data*, 12,  
459 3269–3340, <https://doi.org/10.5194/essd-12-3269-2020>, 2020.

460  
461 Gilfillan, D., and Marland G.: CDIAC-FF: global and national CO2 emissions from fossil fuel combustion and cement  
462 manufacture: 1751–2017, <https://doi.org/10.5194/essd-13-1667-2021>, 2021.

463  
464 Grassi, G., Stehfest, E., Rogelj, J., van Vuuren, D., Cescatti, A., House, J., Nabuurs, G.-J., Rossi, S., Alkama, R., Viñas,  
465 R. A., Calvin, K., Ceccherini, G., Federici, S., Fujimori, S., Gusti, M., Hasegawa, T., Havlik, P., Humpeöder, F., Korosuo,  
466 A., Perugini, L., Tubiello, F. N., and Popp, A.: Critical adjustment of land mitigation pathways for assessing countries’  
467 climate progress, *Nat. Clim. Change*, 11, 425–434, <https://doi.org/10.1038/s41558-021-01033-6>, 2021.

468 Gütschow, J., Jeffery, M. L., Gieseke, R., Gebel, R., Stevens, D., Krapp, M., and Rocha, M.: The PRIMAP-hist national  
469 historical emissions time series, *Earth Syst. Sci. Data*, 8, 571–603, <https://doi.org/10.5194/essd-8-571-2016>, 2016.

470  
471 Gütschow, J., Günther, A., Jeffery, M. L., and Gieseke, R.: The PRIMAP-hist national historical emissions time series  
472 (1850-2018) v2.2, <https://doi.org/10.5281/zenodo.4479172>, 2021.

473  
474 IMF: International Monetary Fund: International Monetary Fund website, available at:  
475 <https://www.imf.org/en/Publications/fandd/issues/Series/Back-to-Basics/gross-domestic-product-GDP>, last access :  
476 February 2022.

477  
478 IPCC: Climate Change 2021: The Physical Science Basis. Contribution of Working Group I to the Sixth Assessment  
479 Report of the Intergovernmental Panel on Climate Change [Masson-Delmotte, V., P. Zhai, A. Pirani, S.L. Connors, C.  
480 Péan, S. Berger, N. Caud, Y. Chen, L. Goldfarb, M.I. Gomis, M. Huang, K. Leitzell, E. Lonnoy, J.B.R. Matthews, T.K.  
481 Maycock, T. Waterfield, O. Yelekçi, R. Yu, and B. Zhou (eds.)]. Cambridge University Press, Cambridge, United  
482 Kingdom and New York, NY, USA, In press, doi:10.1017/9781009157896, 2021.

483  
484 Mostefaoui, M., Ciais, P., McGrath, M. J., Peylin, P., Prabir, P. K., Saunio, M., Chevallier, F., Sitch, S., Rodenbeck, C.,  
485 Luijkx, I., and Thompson, R.: Datasets for greenhouse gasses emissions and removals from inventories and global models  
486 over Africa v0.1, Zenodo [data set], <https://doi.org/10.5281/zenodo.7347077>, 2022.

487  
488 NOAA Website, available at: <https://www.noaa.gov/> (last access: August 2023), 2023.

489 Patra, P. K., Takigawa, M., Watanabe, S., Chandra, N., Ishijima, K., and Yamashita, Y.: Improved Chemical Tracer  
490 Simulation by MIROC4.0-based Atmospheric Chemistry-Transport Model (MIROC4-ACTM), *Sola*, 14, 91–96,  
491 <https://doi.org/10.2151/sola.2018-016>, 2018.

492  
493 World Bank: GDP exchange rate estimates, available at <https://data.worldbank.org/indicator/NY.GDP.MKTP.CD> last  
494 accessed, 2019.

495  
496 World Bank: World Bank economic data, available at: <https://www.worldbank.org/> (last access: May 2022), 2022.

Mis en forme :  
Police : Non  
Italique
