# Supplementary material for: Greenhouse gas emissions and their trends over the last three decades across Africa
Source: Copernicus journal article supplement (doi:10.5194/essd-2023-186), 2023-07-06
Supplement: Supplementary file 2 [file essd-2023-186-supplement.pdf]

# Supplementary figures and methods

## Map of six groups of African countries

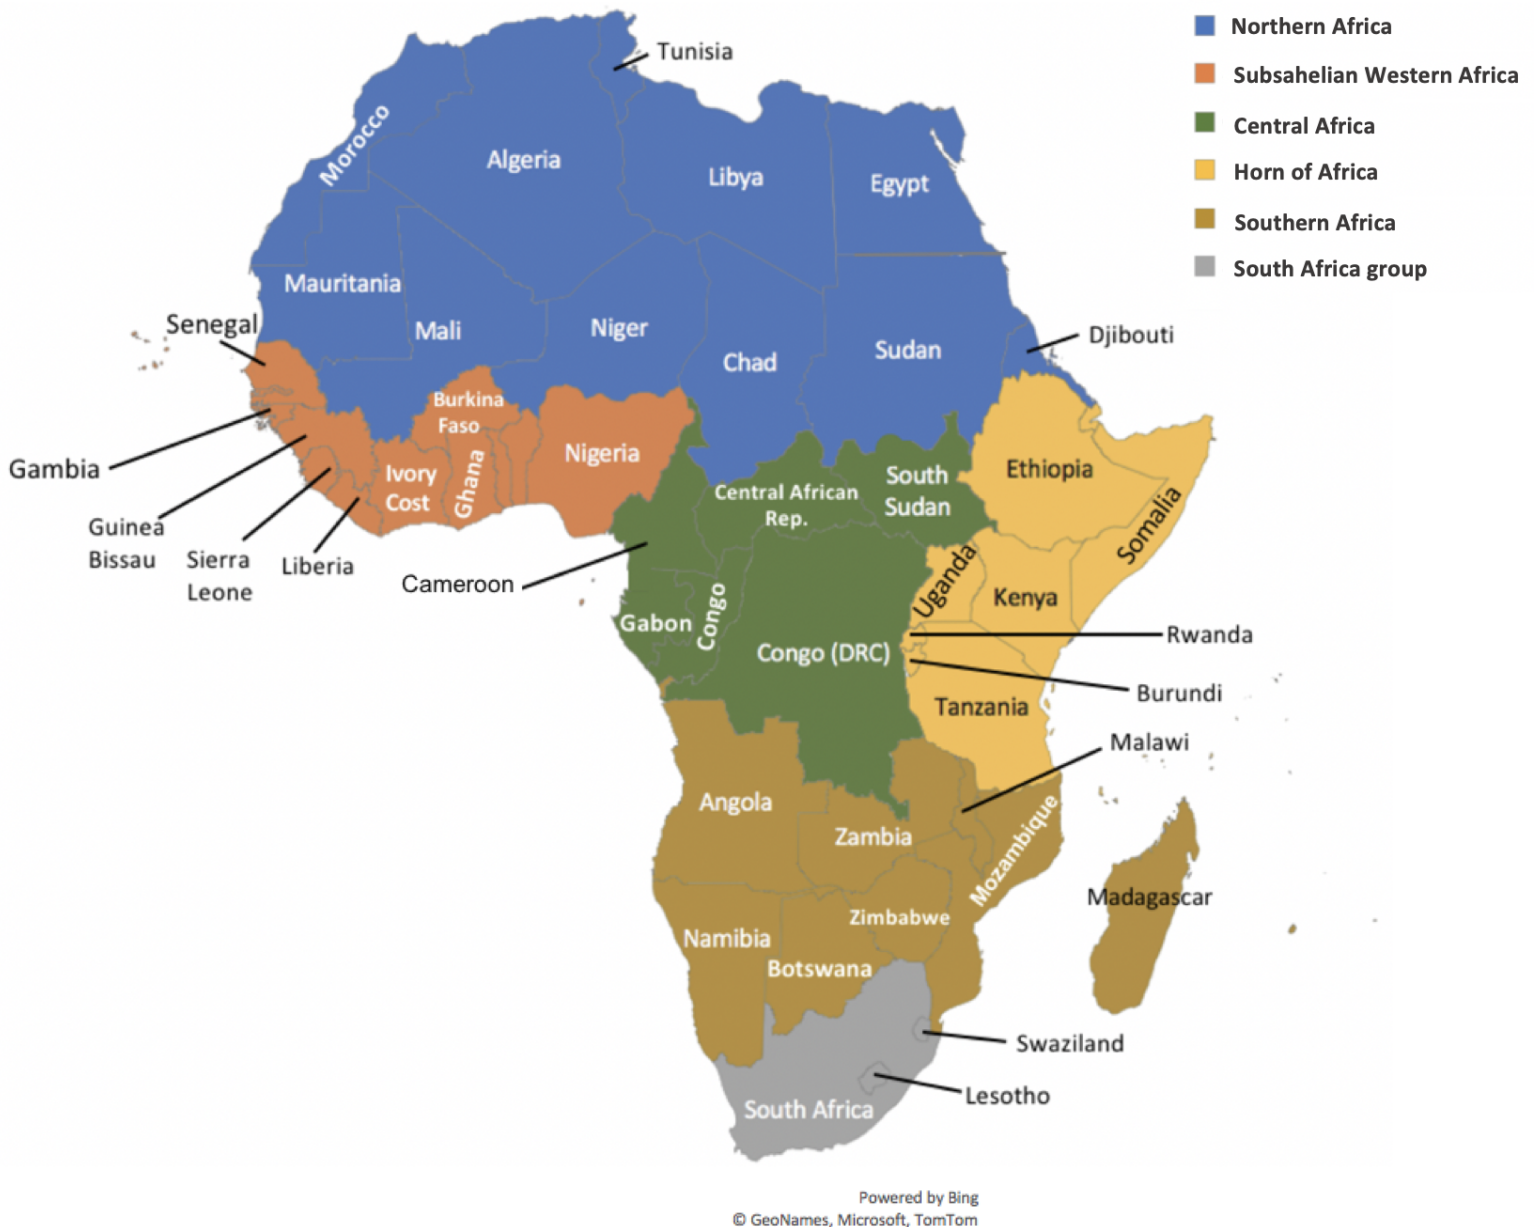

Figure S1. Map of six African groups.

**Table S1. List of African countries per group.**

| <b>Country name</b>                                                                                                                                                               | <b>Group</b>               |
|-----------------------------------------------------------------------------------------------------------------------------------------------------------------------------------|----------------------------|
| Algeria<br>Chad<br>Egypt<br>Eritrea<br>Libya<br>Mali<br>Mauritania<br>Morocco<br>Niger<br>Sudan<br>Tunisia                                                                        | Northern Africa            |
| Benin<br>Burkina Faso<br>Cape verde<br>Ivory Cote<br>Gambia<br>Ghana<br>Guinea<br>Guinea-Bissau<br>Liberia<br>Nigeria<br>Sao Tome and Principe<br>Senegal<br>Sierra Leone<br>Togo | Subsahelian Western Africa |
| Cameroon<br>Central African Republic<br>Democratic Republic of the Congo<br>Gabon<br>Republic of the Congo<br>South Sudan                                                         | Central African countries  |
| Burundi<br>Comoros<br>Djibouti<br>Ethiopia<br>Kenya<br>Rwanda<br>Seychelles<br>Somalia<br>Uganda<br>United Republic of Tanzania                                                   | Horn of Africa             |
| Angola<br>Botswana<br>Madagascar<br>Malawi<br>Mauritius<br>Mozambique<br>Namibia<br>Zambia<br>Zimbabwe                                                                            | Southern countries         |

Table S2. Data sources for the anthropogenic fossil CO<sub>2</sub> emissions included in this study.

| Method | Product type / file name | Species                                                                                                                                                 | Overall period covered | References                                                                                                                                           |
|--------|--------------------------|---------------------------------------------------------------------------------------------------------------------------------------------------------|------------------------|------------------------------------------------------------------------------------------------------------------------------------------------------|
| BU     | GCP/CDIAC                | CO <sub>2</sub> fossil country totals with detailed emissions separating different subsectors                                                           | 1990-2019              | -GCP (Le Quéré et al., 2018; Friedlingstein et al., 2019)<br>-CDIAC<br><a href="https://cdiac.ess-dive.lbl.gov/">https://cdiac.ess-dive.lbl.gov/</a> |
| BU     | PRIMAP-hist              | CO <sub>2</sub> , CH <sub>4</sub> and N <sub>2</sub> O fossil country totals (excluding LULUCF) with detailed emissions separating different subsectors | 1990-2019              | -PRIMAP<br><a href="https://www.pik-potsdam.de/paris-reality-check/primap-hist/">https://www.pik-potsdam.de/paris-reality-check/primap-hist/</a>     |

Per capita CO<sub>2</sub> and CH<sub>4</sub> emissions in tCO<sub>2</sub>eq. for (2013-2017) per African country and color group

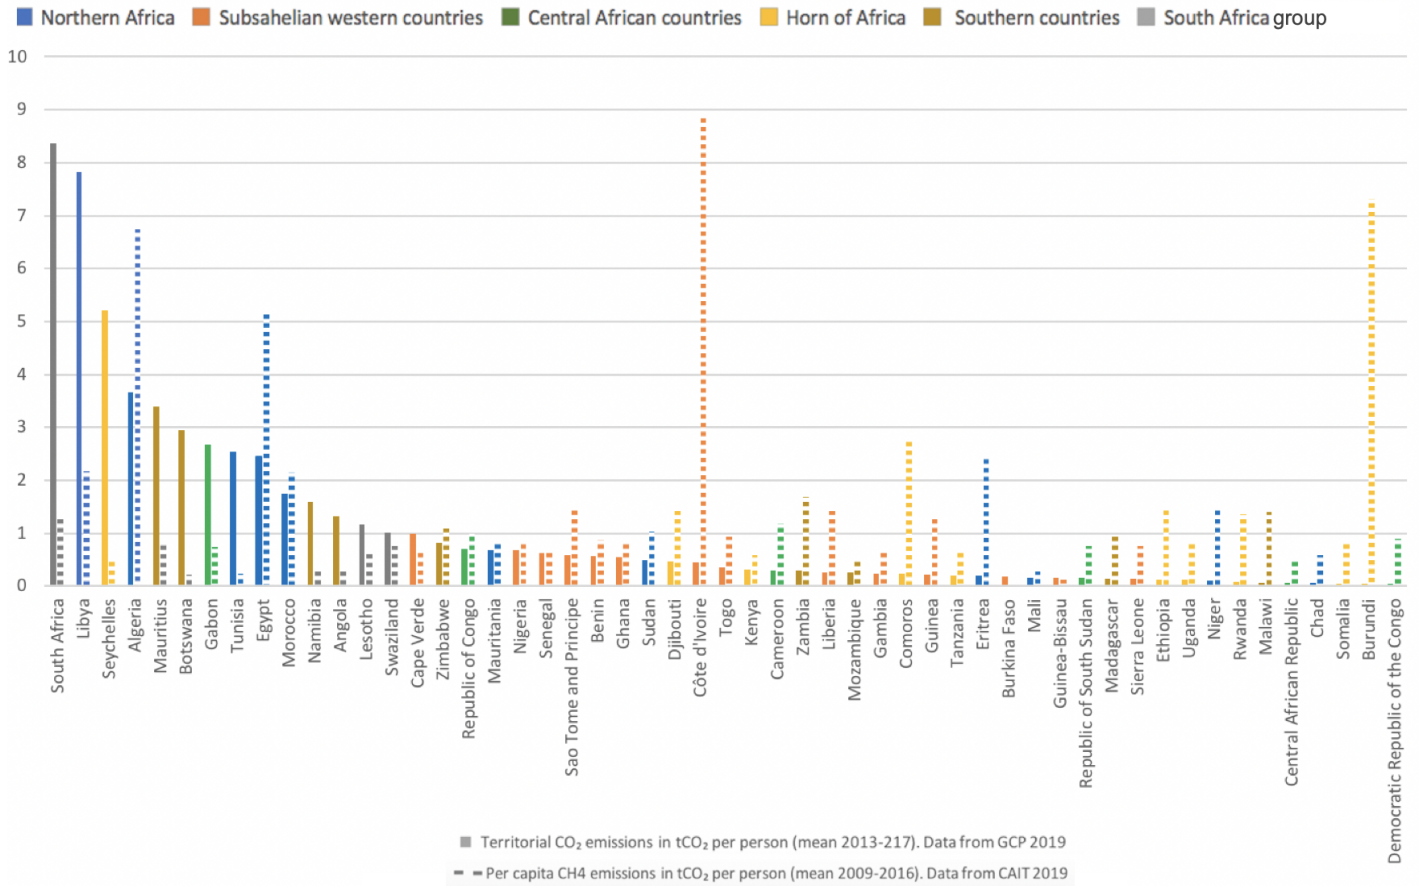

Figure S2. Bar plots of detailed African emissions for the mean values of the recent five years for fossil CO<sub>2</sub> and anthropogenic CH<sub>4</sub> in tCO<sub>2</sub>e per capita, and by group color for 2009-2016.



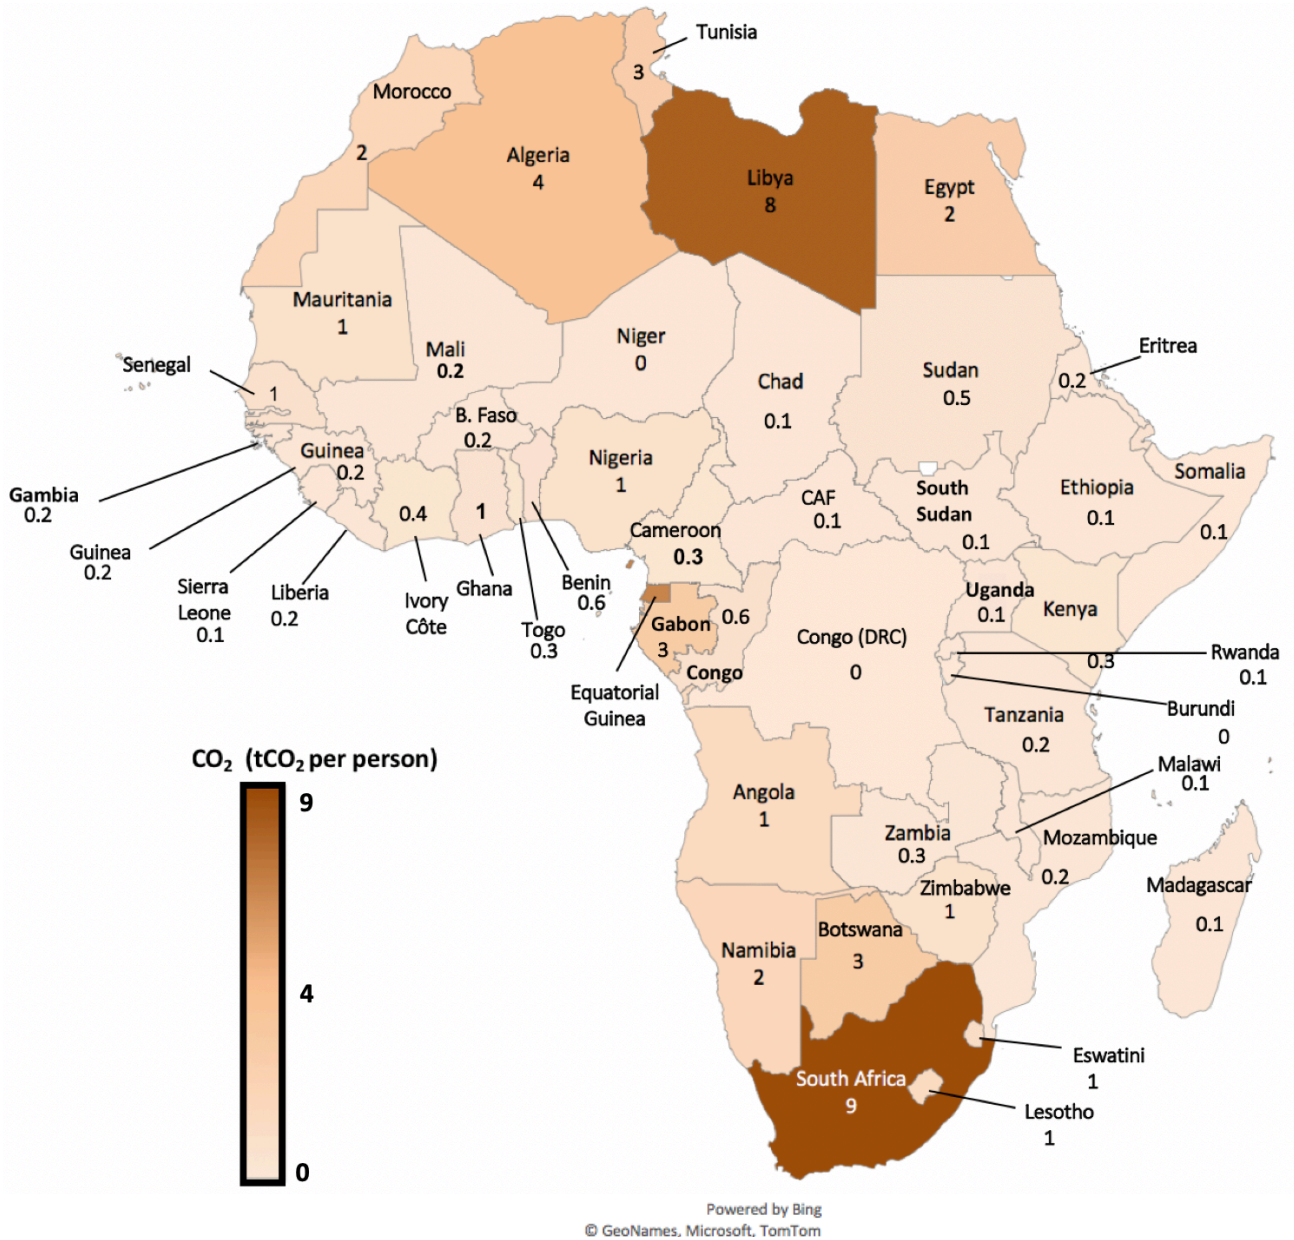

Figure S3. Map of African decennial 2009-2018 GCP CO<sub>2</sub> fossil fuel emissions per capita in tCO<sub>2</sub> per person - CDIAC.

### Methodological supplementary M1. Steps for computing the GINI index of African country emissions.

The GINI index is a metric assessing the level of dispersion and therefore the level of inequalities among the values of a given dataset. To show the inequalities of per capita emissions among the African countries, we computed the continent GINI index for each of the last three decades using the Pareto principle for the following fluxes : fossil CO<sub>2</sub> per capita emissions, CH<sub>4</sub> fossil + agriculture per capita emissions, CH<sub>4</sub> from agriculture per capita emissions. We computed the GINI using the Pareto method also named 20/80 or ABC method, using an excel file for the several countries' data manipulation. We obtained the GINI index ( $\gamma$ ) thanks to the formula :

$$\gamma = \frac{[(\sum_1^n y_i \times x_i) - 5000]}{5000}$$

When  $\gamma$  is bigger than 0.6, it means that the area delimited by the curve of the cumulated criterion and the graph diagonal represents more than 60% of the surface of half of the graph, and that the dispersion of the dataset is high. This method was built in the 19<sup>th</sup> century based on Vilfredo Pareto's observations regarding the inequalities of repartition of the volume of housing taxes among the taxpayers (he realized that 80% of this tax was paid by 20% of the taxpayer.) The different steps that we followed to compute the GINI are detailed below:

- 1)computation of the territorial emissions per capita in every African country,
- 2)ranking in a decreasing order (from the highest to the smallest one),
- 3)computation of the cumulative emissions,
- 4)creation of a column with the cumulative emissions expressed as a percentage,
- 5)creation of a column with a rank (integer) for those ordered emissions from the biggest to the smallest,
- 6)conversion of this rank as a percentage in another column,
- 7)distinction of the emissions representing less than 25% of emissions, less than 50%, and less than 75% of emissions.
- 8)computation of the GINI index ( $\gamma$ ) thanks to the Pareto's formula:

$$\gamma = \frac{[(\sum_1^n y_i \times x_i) - 5000]}{5000}$$

African GDP in US\$ at current prices for the year 2015 - World Bank national accounts data/OECD.

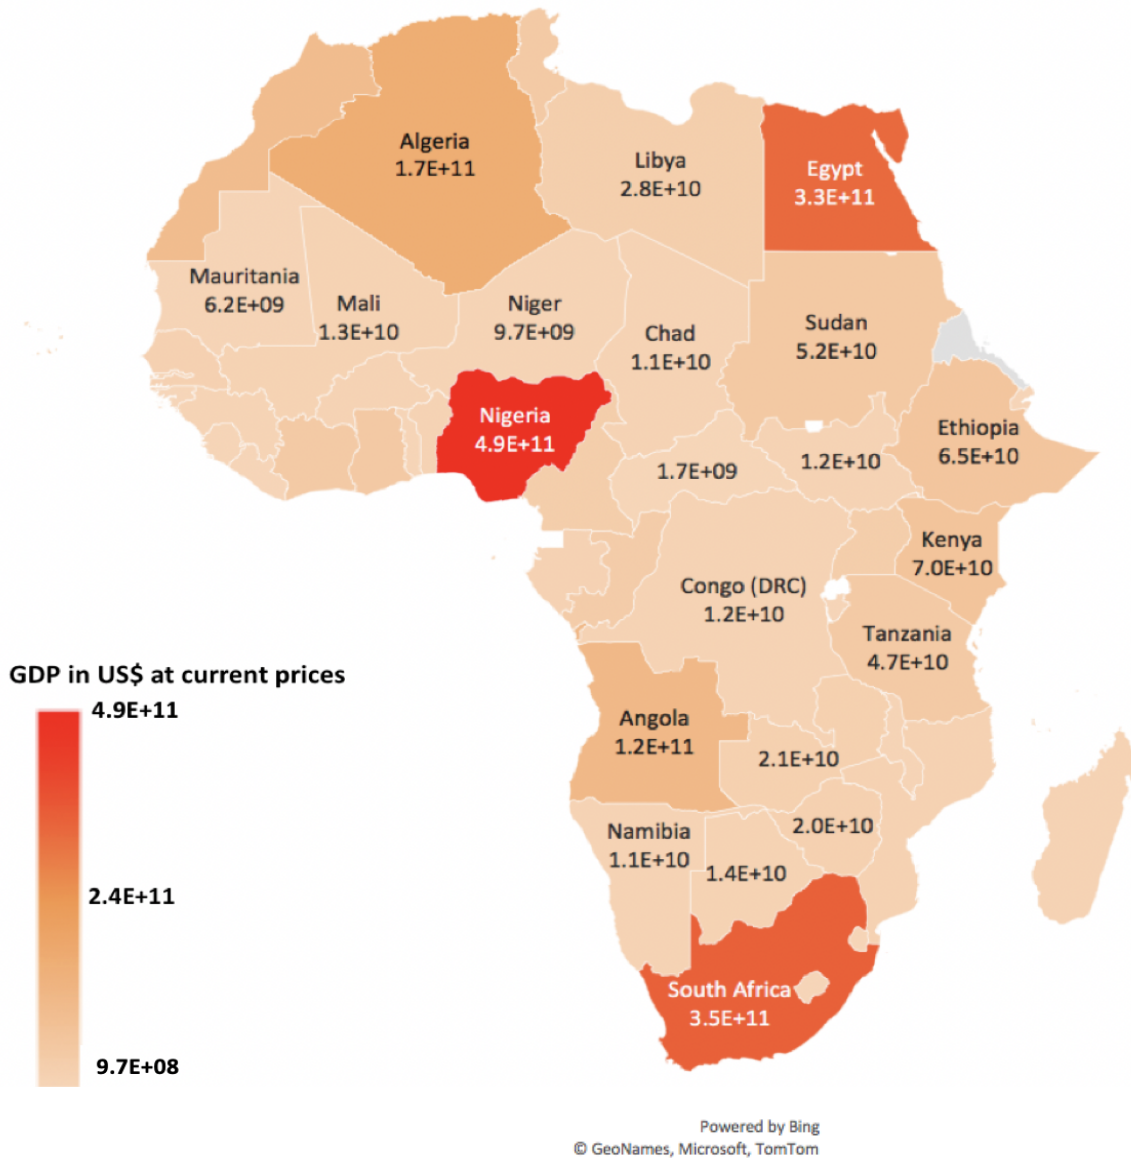

Figure S4. Bar plots and associated map of GDP, dataset taken from World Bank national accounts data/OECD (2020).

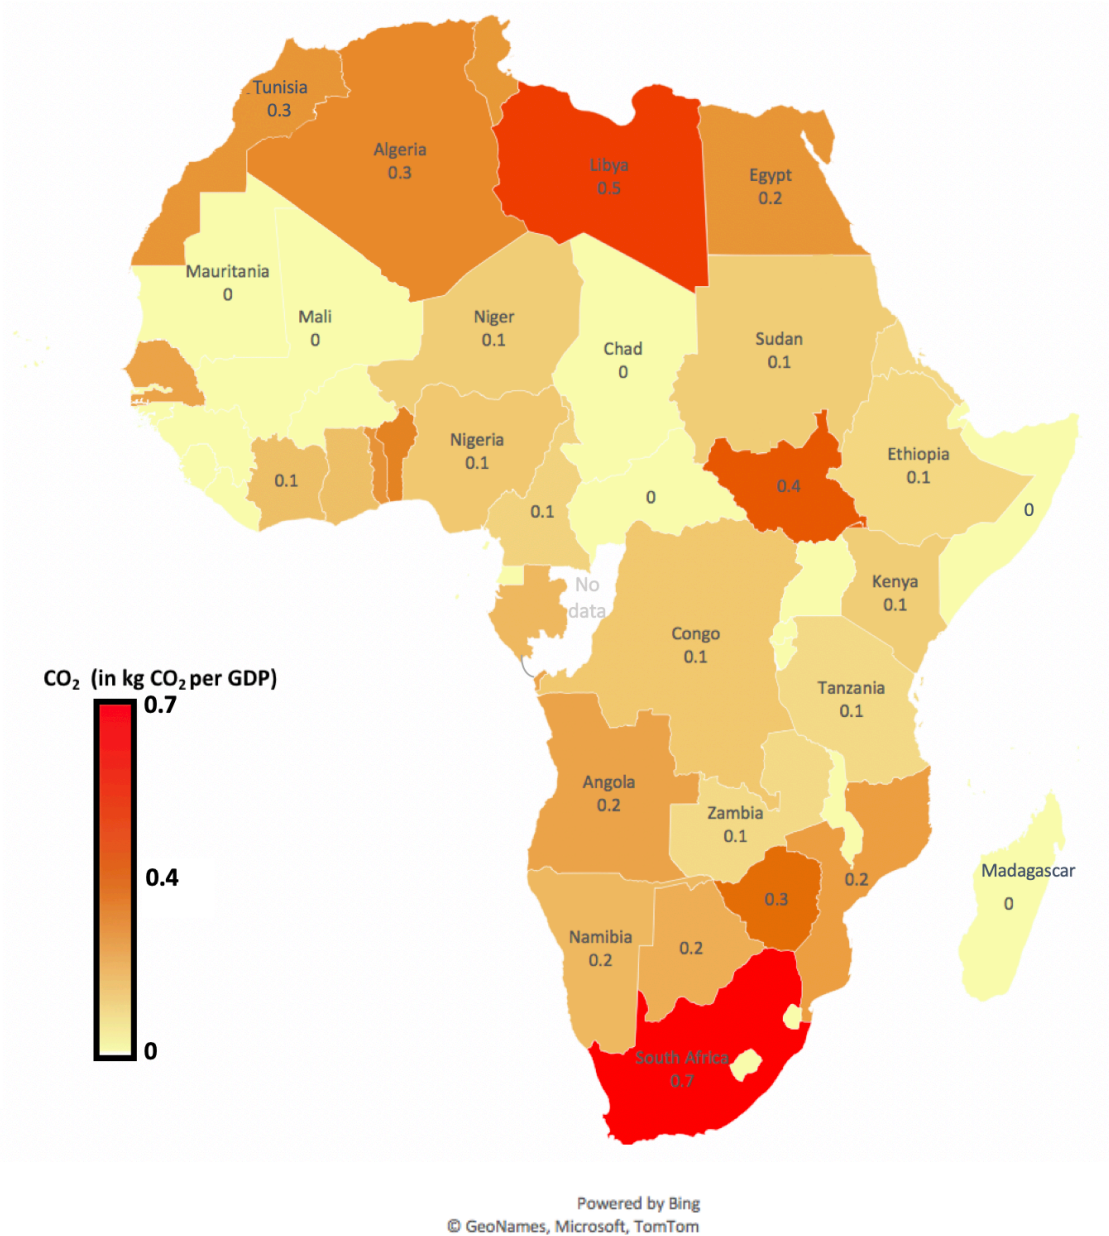

Figure S5. Map of territorial mean 2013-2017 emissions and its associated bar plots in kg CO<sub>2</sub> of GDP, dataset taken from GCP 2019 (CDIAC).



Territorial emissions in kgCO<sub>2</sub> per GDP - mean 2013-2017. GCP 2020

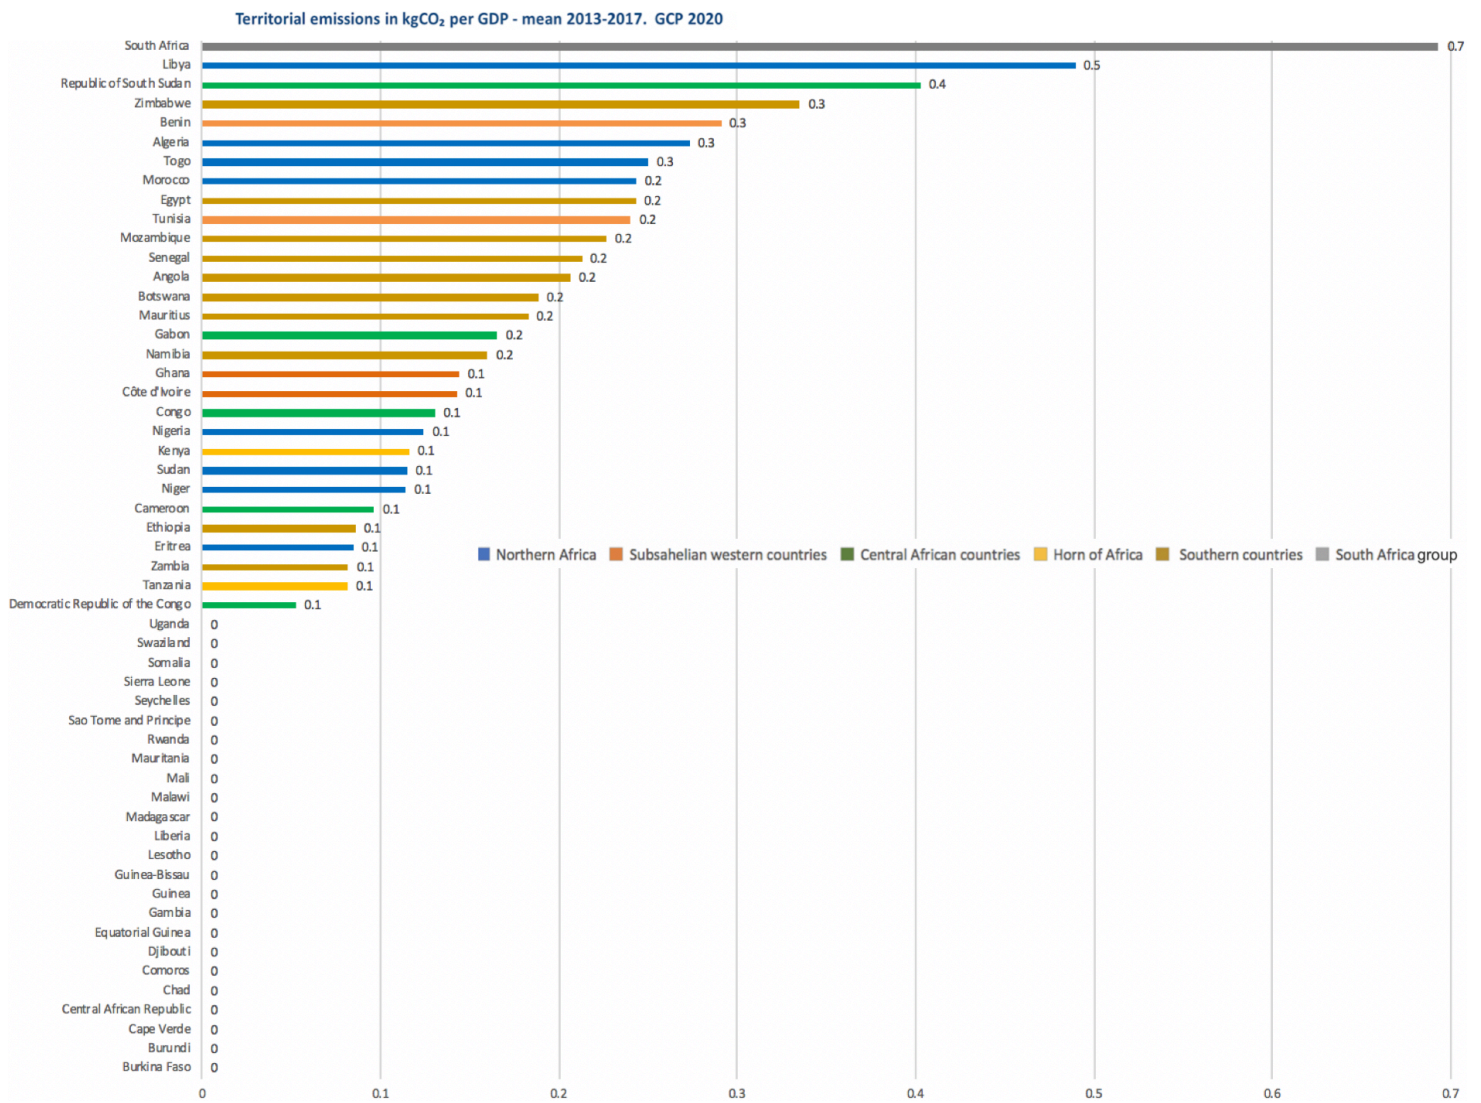

Figure S5 bis. Map of territorial mean 2013-2017 emissions and its associated bar plots in kg CO<sub>2</sub> of GDP, dataset taken from GCP 2019 (CDIAC).

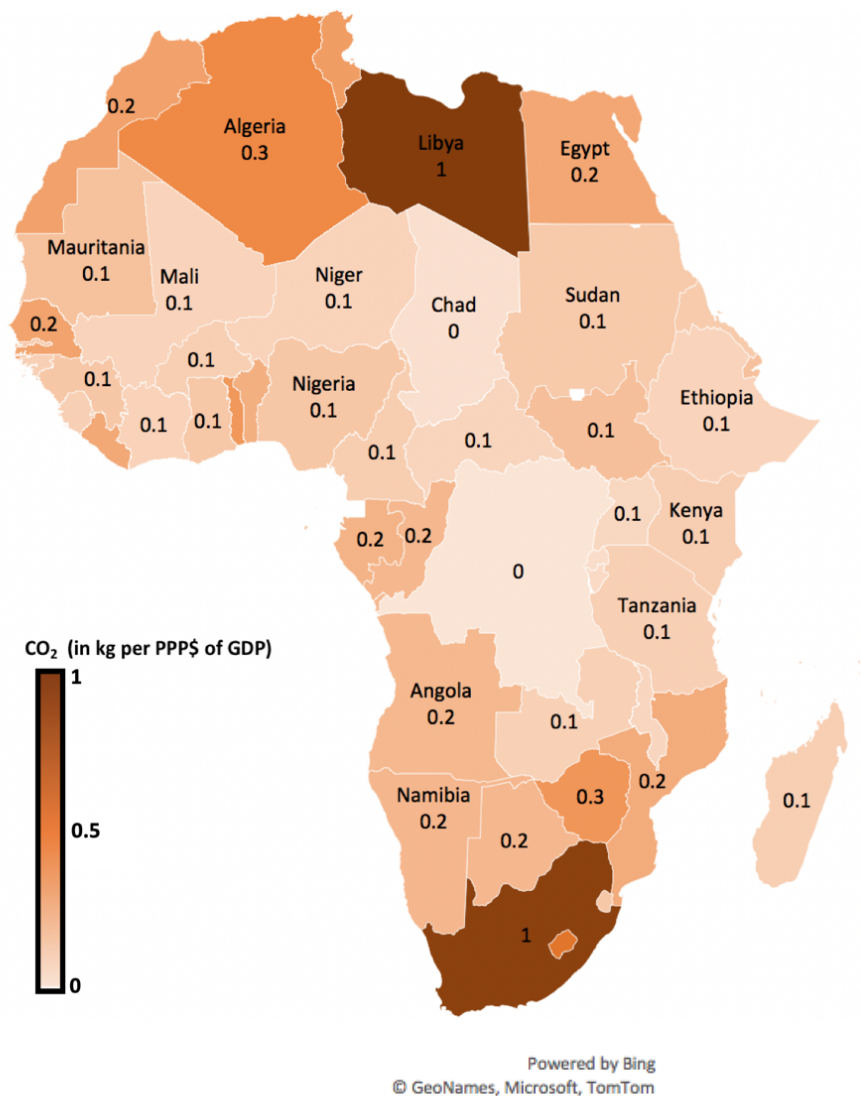

Figure S6. Map of African CO<sub>2</sub> emissions expressed in kg per PPP\$ of GDP in 2016 - CDIAC.



a) Map of African countries CO<sub>2</sub> fossil differences over 1990-1998 in terms of ratio percentage between GCP and PRIMAP-hist datasets :  $(GCP - PRIMAP) / (\text{mean}(GCP, PRIMAP))$

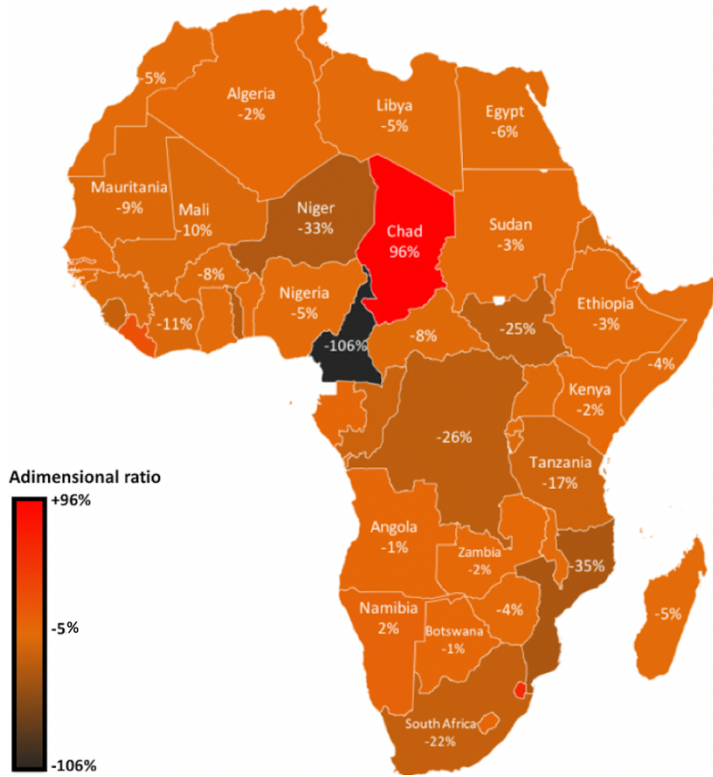

b) Map of African countries CO<sub>2</sub> fossil differences over 1999-2008 in terms of ratio percentage between GCP and PRIMAP-hist datasets :  $(GCP - PRIMAP) / (\text{mean}(GCP, PRIMAP))$

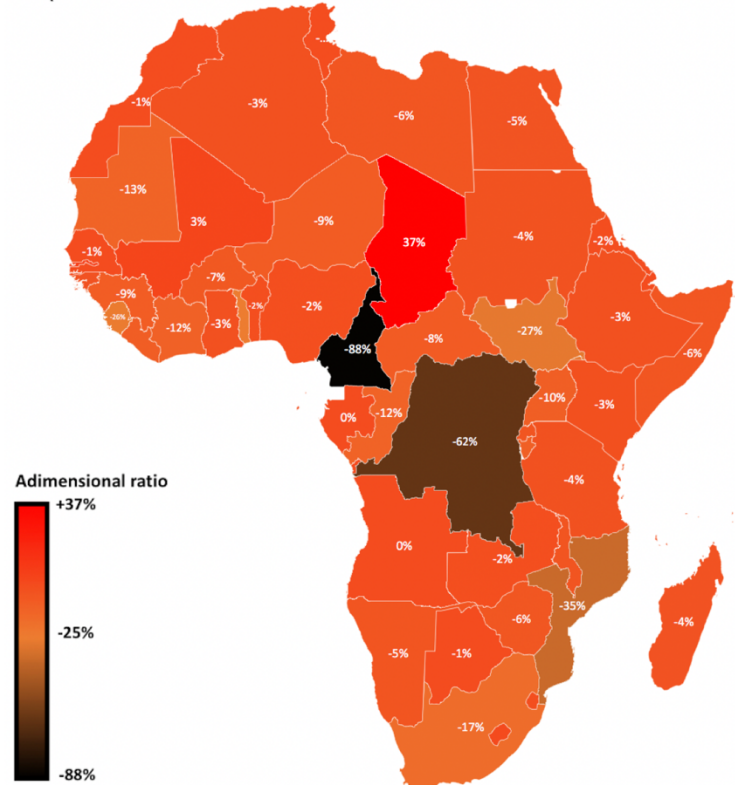

c) Map of African countries CO<sub>2</sub> fossil differences over 2009-2018 in terms of ratio percentage between GCP and PRIMAP-hist datasets :  $(GCP - PRIMAP) / (\text{mean}(GCP, PRIMAP))$

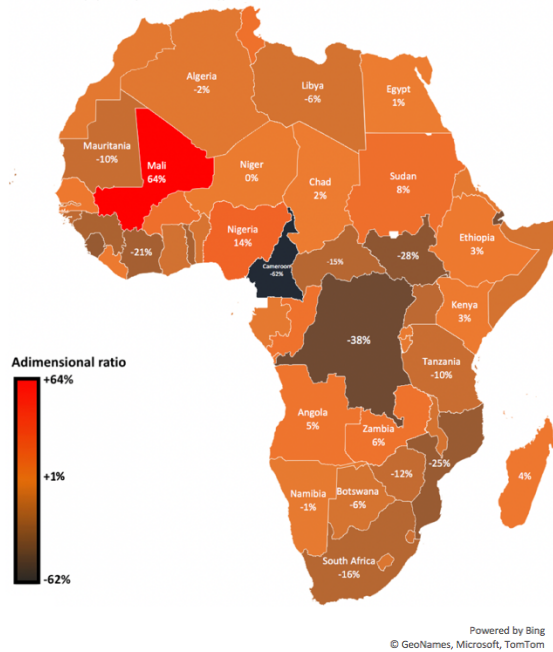

Figure S7. Three maps of African countries fossil CO<sub>2</sub> emissions per decade : ratio percentage showing the discrepancies between GCP and PRIMAP-hist datasets over three decades (1990-2018).

## Methodological Supplementary M2 - discussion about the rescaling for CO<sub>2</sub> inversions

We operated a rescaling by subtracting back the prescribed fossil fuel fluxes to make sure that the inversions do not differ regarding prior fluxes for better comparability.

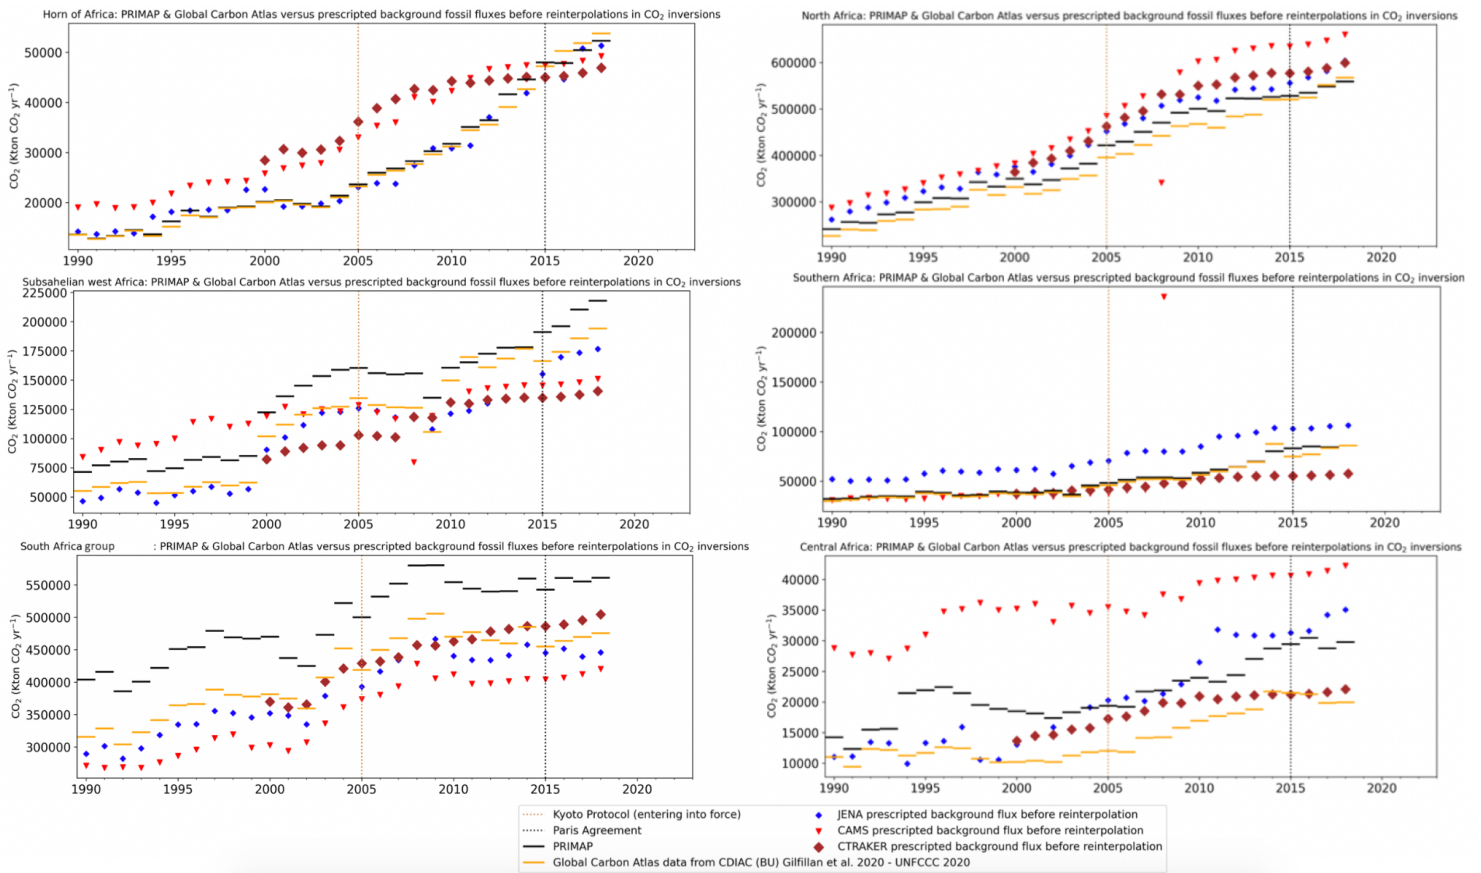

Figure S8. Comparison of PRIMAP-hist, GCP versus prescribed fossil fluxes for three CO<sub>2</sub> inversion models at the regional scale.

**Table S3. Lists of Least Developed Countries and Small Islands Developing States in Africa.**

| 33 Least Developed Countries (LDCs)                                                                                                                                                                                                                                                                                                                  | 6 Small Islands Developing States (SIDS)                                          |
|------------------------------------------------------------------------------------------------------------------------------------------------------------------------------------------------------------------------------------------------------------------------------------------------------------------------------------------------------|-----------------------------------------------------------------------------------|
| Angola, Benin, Burkina Faso, Burundi, Central African Republic, Chad, Comoros, D.R. Congo, Djibouti, Eritrea, Ethiopia, Gambia, Guinea, Guinea-Bissau, Lesotho, Liberia, Madagascar, Malawi, Mali, Mauritania, Mozambique, Niger, Rwanda, São Tomé and Príncipe, Senegal, Sierra Leone, Somalia, South Sudan, Sudan, Tanzania, Togo, Uganda, Zambia. | Cape Verde, Comores, Guinea-Bissau, Mauritius, Sao Tomé and Principe, Seychelles. |

**Table S4. List of corrected countries for CO<sub>2</sub> LULUCF (in MtCO<sub>2</sub>e) - corrections in line with Grassi (2022)**

| Country                          | Year of most recent outlier report | Outlier value and source | Year corrected data | Corrected data and source     | Mean corrected value over 2000-2020 | Mean difference over 2000-2020 | Comments on the chosen correcting method.                                                                                                                                                                                                                                             |
|----------------------------------|------------------------------------|--------------------------|---------------------|-------------------------------|-------------------------------------|--------------------------------|---------------------------------------------------------------------------------------------------------------------------------------------------------------------------------------------------------------------------------------------------------------------------------------|
| CAF                              | 2010                               | -1766 (NC2)              | 2016                | -229 (NDC)                    | -229                                | 1537                           | NDC 2016 because more recent than NC2 (2015), and sink in most recent NDC 2021 biophysically impossible.                                                                                                                                                                              |
| Guinea-Bissau                    | 2001                               | -11288 (NC1)             | 2010                | -1 (NC2)                      | -1                                  | -11287                         | NC1 value reports an unrealistically high sink.                                                                                                                                                                                                                                       |
| Tanzania                         | 1994                               | 810 (NC2)                | 2022                | 77 (NDC 2022 <sup>1</sup> )   | 77                                  | 566                            | NDC is more recent and underlines a more realistic order of magnitude.                                                                                                                                                                                                                |
| Guinea                           | 2000                               | -444 (NC2)               | 2021                | 34 (NDC 2021)                 | 34                                  | 478                            | NDC 2021 chosen because more recent than NC2 (2018), and the sink in NC2 is biophysically impossible (-444 MtCO <sub>2</sub> e.yr <sup>-1</sup> over only 5 Mha of forest). However, a remaining problem with the corrected value from nc2 is that no forest sink at all is reported. |
| Namibia                          | 2000                               | 11 (NC3)                 | 2019                | -117 (NIR 2019 <sup>2</sup> ) | -106                                | -117                           | NIR 2019 chosen because more recent than NC3 (2015) and more complete than NDC 2021 which is more recent.                                                                                                                                                                             |
| Mali                             | 2010                               | -245 (NC3)               | Mean 2000 and 2010  | -221 (mean of NC2 and NC3)    | -155                                | 66                             | Mean of NC2 and NC3 as more complete than REDD+. The sink in NC3 is high and here considered implausible, but it is however consistently reported in various official UNFCCC documents.                                                                                               |
| Democratic Republic of the Congo | 2015                               | -235 (NC3)               | 2021                | 529 (NDC 2021)                | 529                                 | 761                            | NDC 2021 chosen because more recent than the NC3 (2015) and broadly consistent with REDD+ (2018). But a weakness of this correction source is that it does not report any carbon sink from forest.                                                                                    |
| Madagascar                       | 2010                               | -97 (NC3)                | 2017                | 34 (REDD+ 2018)               | 34                                  | 131                            | REDD+ (2018) chosen because more recent than NC3 (2017), but it covers only deforestation. NC3 reports a biophysically impossible sink over only 9 Mha of forest.                                                                                                                     |
| Nigeria                          | 2014                               | 98 (NC2)                 | 2017                | 315 (BUR2)                    | 287                                 | 189                            | BUR2 (2021) chosen because more recent than NC2 (2014) and more detailed than NDC 2021 which report different numbers.                                                                                                                                                                |
| Zimbabwe                         | 2006                               | -83 NC3 (2017)           | 2021                | 16 (BUR1)                     | 11                                  | 95                             | BUR1 (2021) as more recent than the NC3 (2017) and more complete than NDC 2021.                                                                                                                                                                                                       |
| Congo                            | Since 2000                         | -83 (NC2)                | 2009                | -18 (NC2)                     | -18                                 | 65                             | NDC2021 chosen because more recent than the NC2 (2009).                                                                                                                                                                                                                               |
| Angola                           | 2012                               | 0.7 (NC1)                | 2021                | 55 (NC2)                      | 55                                  | 54                             | NC2 (2021) chosen because more recent than NC1 (2012).                                                                                                                                                                                                                                |
| Mauritius                        | 2013                               | -490 (NC3)               | 2016                | 0 (NIR 2021)                  | 0                                   | 490                            | NIR 2021 more recent than NC3 (with unrealistically high value).                                                                                                                                                                                                                      |

<sup>1</sup>Using Tanzania GHGs Inventory Report and MRV System (2018).<sup>2</sup>NIR = National Inventory Report (NIR).

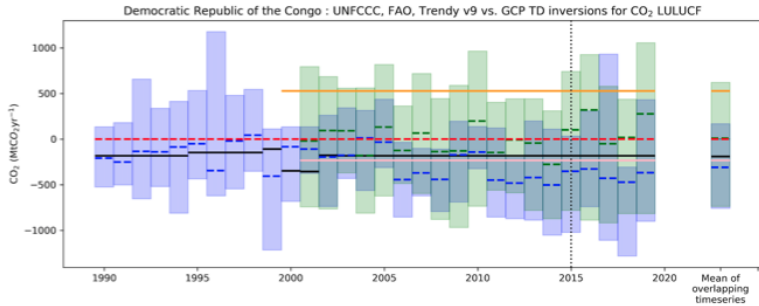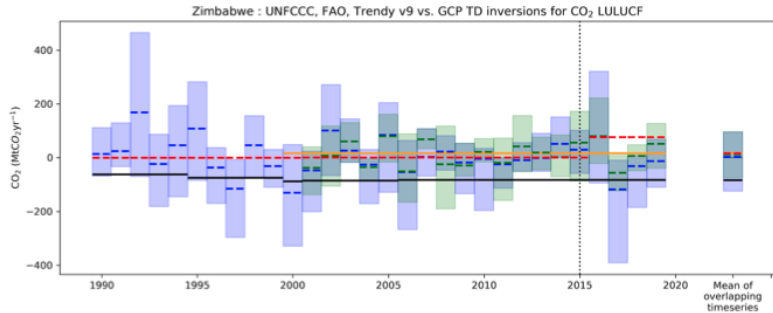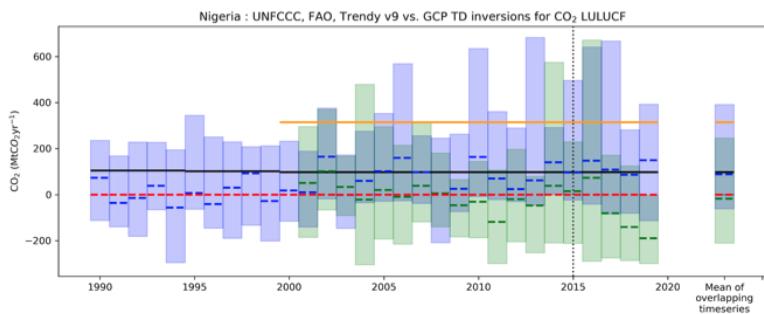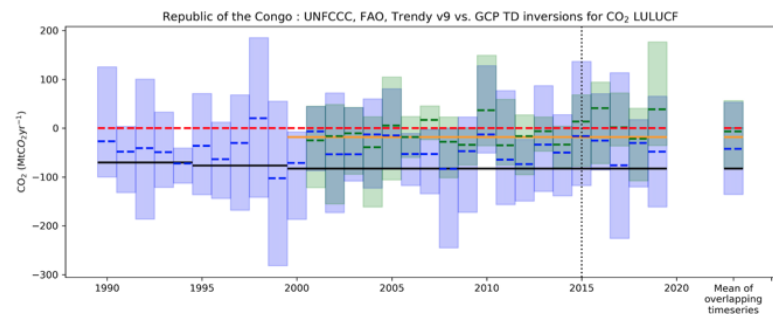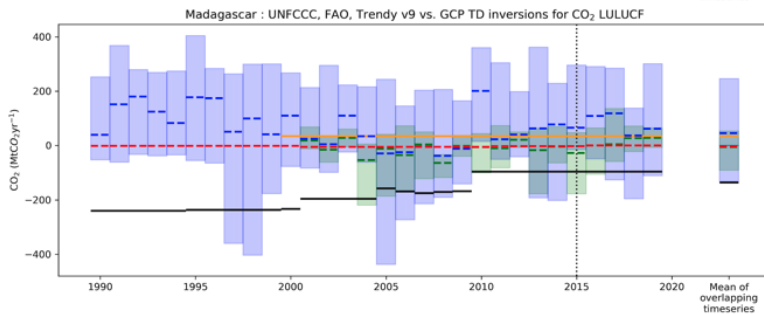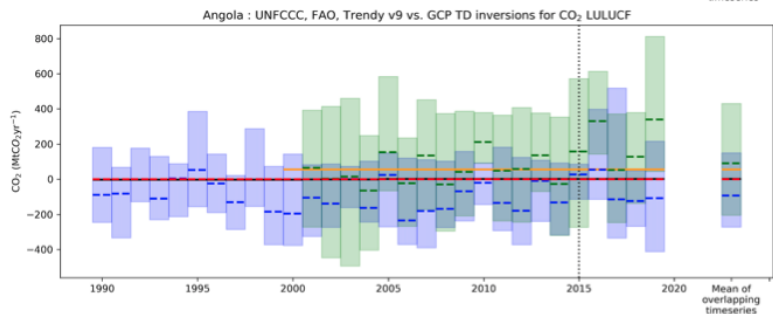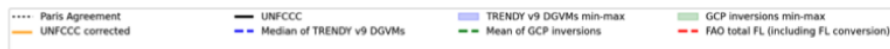



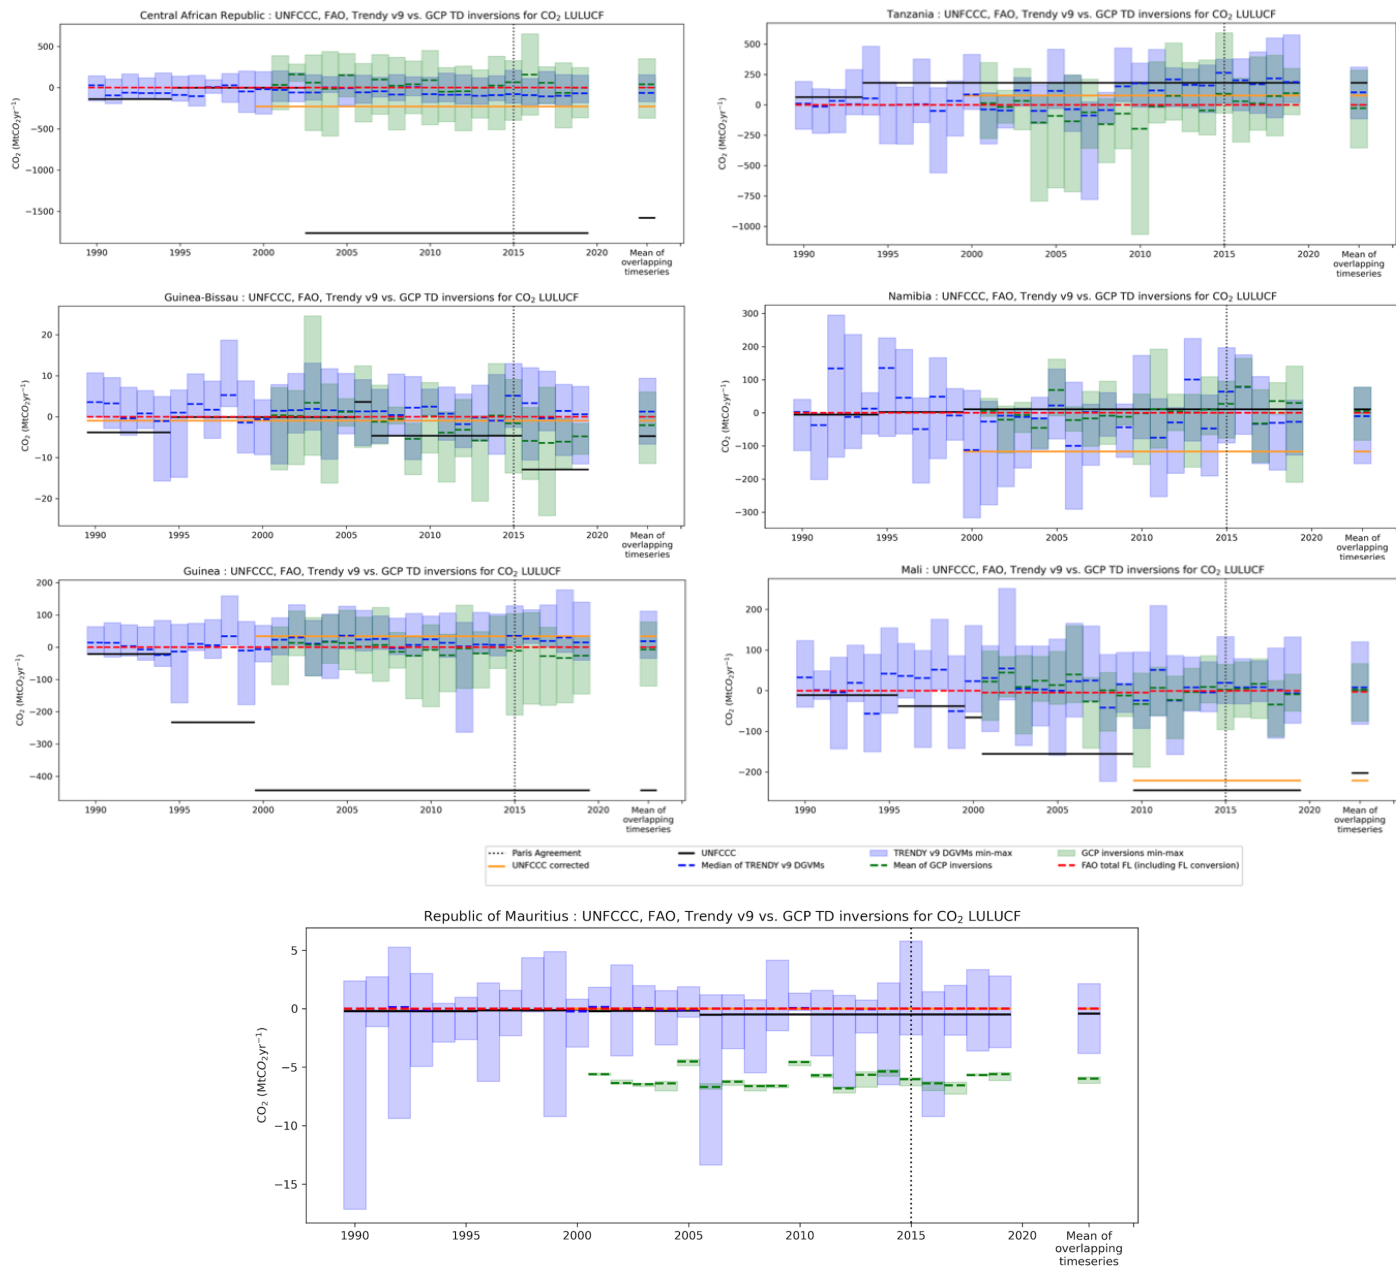

**Figure S9. Country details for LULUCF CO<sub>2</sub> emissions and sinks from UNFCCC corrected (strictly consistent with Grassi et al. 2022) for 13 African countries that we identified as outliers vs. UNFCCC uncorrected data, TRENDY v9, DGVMs and GCP (2020) inversions. Unit is in MtCO<sub>2</sub>. Black lines denote the PRIMAP-hist estimates for total anthropogenic emissions including all IPCC sectors. Shaded green areas represent the minimum and maximum ranges from GCP inversions. Shaded blue areas represent the minimum and maximum ranges for TRENDY v9 DGVMs. Green dashes denote the median of GCP inversions, blue dashes denote the median of TRENDY v9 DGVMs, green dashes the median of GCP inversions. The positive values represent a source while the negative values refer to a sink.**

**Table S5. Data sources for the land CO<sub>2</sub> emissions in this analysis.**

| <b>Method</b> | <b>Product type /<br/>file name</b>                                                                                                                                        | <b>Species</b>                                                       | <b>Overall<br/>period<br/>covered</b> | <b>References</b>                                                                                      |
|---------------|----------------------------------------------------------------------------------------------------------------------------------------------------------------------------|----------------------------------------------------------------------|---------------------------------------|--------------------------------------------------------------------------------------------------------|
| BU            | TRENDY v9<br>(2019) 14<br>DGVMs :<br>CABLE,<br>CLASS,<br>CLM5, DLEM,<br>ISAM,<br>JSBACH,<br>JULES, LPJ,<br>LPX, OCN,<br>ORCHIDEE-<br>CNP,<br>ORCHIDEE,<br>SDGVM,<br>SURFEX | Land-related<br>Carbon<br>emissions (Net<br>Biome<br>Productivity)   | 1900-2019                             | Met Office UK/ Le<br>Quéré et al. (2018)<br><a href="http://www.icos-cp.eu/GCP">www.icos-cp.eu/GCP</a> |
| BU            | UNFCCC                                                                                                                                                                     | LULUCF Net<br>CO <sub>2</sub> emissions /<br>removals                | 1990-2015                             | UNFCCC<br><a href="https://unfccc.int/non-annex-I-NCs">https://unfccc.int/non-annex-I-NCs</a>          |
| TD            | GCB 2019                                                                                                                                                                   | Total CO <sub>2</sub><br>inverse flux (Net<br>Biome<br>Productivity) | 2000-2018                             | Friedlingstein et al.<br>(2020)                                                                        |
|               | Carbon<br>Tracker Europe<br>(CTE)                                                                                                                                          |                                                                      | 2000-2018                             | van der Laan-Luijke<br>et al. (2017)                                                                   |
|               | CAMS (in-situ)                                                                                                                                                             |                                                                      | 2000-2018                             | Chevallier et al.<br>(2005)<br>Rödenbeck (2005)                                                        |
|               | Jena<br>CarboScopeReg<br>(in situ)                                                                                                                                         |                                                                      | 2006-2010                             | Kountouris et al.<br>(2018)                                                                            |



**Table S6. Data sources for total CH<sub>4</sub> emissions in this analysis.**

| <b>Method/observations</b>                     | <b>Product type / number of inversions</b>                 | <b>Overall period covered</b> | <b>References</b>                                            |
|------------------------------------------------|------------------------------------------------------------|-------------------------------|--------------------------------------------------------------|
| TD (surface stations)                          | Carbon Tracker-Europe CH <sub>4</sub> , CTE_SURF (FMI)/ 1  | 2000-2017                     | Tsuruta et al. (2017)                                        |
| TD (GOSAT NIES L2 v2.72)                       | Carbon Tracker-Europe CH <sub>4</sub> , CTE_GOSAT (FMI)/ 1 | 2000-2017                     | Tsuruta et al. (2017)                                        |
| TD (surface stations)                          | GELCA_SURF (NIES)/ 1                                       | 2000-2015                     | Ishizawa et al. (2016)                                       |
| TD (surface stations)                          | LMZ_PYVAR (LSCE)/ 2                                        | 2010-2016                     | Yin et al. (2020)                                            |
| TD (GOSAT 7.2 Leicester v2)                    | LMZ_PYVAR (LSCE)/ 4                                        | 2010-2016                     | Yin et al. (2020)                                            |
| TD (GOSAT 7.2 Leicester v2)                    | LMZ_PYVAR (LSCE)/ 2                                        | 2010-2017                     | Zheng et al. (2018)                                          |
| TD (surface stations)                          | MIROC4- ACTM (JAMSTEC)/ 1                                  | 2010-2016                     | Patra et al. (2016)                                          |
| TD (surface stations)                          | NICAM-TM (NIES)/ 1                                         | 2000-2017                     | Niwal et al. (2017)                                          |
| TD (surface stations)                          | NIES-TM-FLEXPART-VAR (NETFVAR), (NIES)/ 1                  | 2010-2017                     | Maksyutov et al. (2020); Wang et al. (2019)                  |
| TD (GOSAT NIES L2 v2.72)                       | NIES-TM-FLEXPART-VAR (NETFVAR), (NIES)/ 1                  | 2010-2017                     | Maksyutov et al. (2020); Wang et al. (2019)                  |
| TD (surface stations)                          | TM5-CAMS (TNO)/1                                           | 2000-2017                     | Segers and Houweling (2018). Bergamaschi et al. (2013, 2018) |
| TD (GOSAT/CCI v2.3.8 and surface observations) | TM5-CAMS (TNO)/1                                           | 2010-2017                     | Segers and Houweling (2018). Bergamaschi et al. (2013, 2018) |
| TD (surface stations)                          | TM5-4DVAR (EC_JRC)/2                                       | 2000-2017                     | Bergamaschi et al. (2013, 2018)                              |
| TD (GOSAT/CCI v2.3.8 and surface observations) | TM5-4DVAR(EC_JRC)/2                                        | 2010-2017                     | Bergamaschi et al. (2013, 2018)                              |
| TD (surface stations)                          | TOMCAT (University of Leeds)/                              | 2003-2015                     | McNorton (2018)                                              |

**Table S7. Data sources for total N<sub>2</sub>O inverse flux over Africa (in situ).**

| <b>Method</b> | <b>Product type / file name</b> | <b>Period covered</b> | <b>References</b>                          |
|---------------|---------------------------------|-----------------------|--------------------------------------------|
| TD            | PyVAR                           | 1998-2017             | Thompson et al. (2014), Tian et al. (2020) |
| TD            | TOMCAT- INVICAT                 | 1998-2015             | Wilson et al. (2014), Tian et al. (2020)   |
| TD            | MIROC4- ACTM (JAMSTEC)          | 1998-2016             | Patra et al. (2018), Tian et al. (2020)    |

**Table S8. Area of managed land reported in NC/BUR/REDD+ versus FAO forest land (2015) and FAO forest land + other woodlands (2015) for Africa.**

| Country         | Forest area in Mha. Data: FAO (2015) | Inventories forest area in Mha. Data: UNFCCC/REDD+ | Forest land area + other woodland area in Mha. Data : FAO (2015) |
|-----------------|--------------------------------------|----------------------------------------------------|------------------------------------------------------------------|
| Mauritius       | 0.04                                 | 0.00                                               | 0.05                                                             |
| Rwanda          | 0.27                                 | 0.00                                               | 0.53                                                             |
| Cape Verde      | 0.04                                 | 0.04                                               | 0.08                                                             |
| Burundi         | 0.28                                 | 0.71                                               | 0.28                                                             |
| Togo            | 1.22                                 | 1.00                                               | 3.33                                                             |
| Eritrea         | 1.07                                 | 1.59                                               | 7.03                                                             |
| Algeria         | 1.96                                 | 2.14                                               | 4.53                                                             |
| Guinea-Bissau   | 2.02                                 | 2.46                                               | 2.19                                                             |
| Eq. Guinea      | 2.49                                 | 2.50                                               | 2.49                                                             |
| Mauritania      | 0.34                                 | 3.00                                               | 2.74                                                             |
| Côte d'Ivoire   | 3.40                                 | 3.40                                               | 5.96                                                             |
| Benin           | 3.39                                 | 3.59                                               | 5.34                                                             |
| Liberia         | 7.77                                 | 4.52                                               | 8.07                                                             |
| Guinea          | 6.39                                 | 4.60                                               | 12.24                                                            |
| Kenya           | 3.52                                 | 4.75                                               | 35.14                                                            |
| Botswana        | 15.85                                | 5.83                                               | 42.34                                                            |
| Morocco         | 5.68                                 | 6.00                                               | 6.97                                                             |
| Namibia         | 6.99                                 | 7.00                                               | 61.07                                                            |
| Niger           | 1.14                                 | 8.00                                               | 4.28                                                             |
| Ghana           | 7.88                                 | 8.97                                               | 7.88                                                             |
| Madagascar      | 12.50                                | 9.00                                               | 26.96                                                            |
| Malawi          | 2.45                                 | 9.00                                               | 2.45                                                             |
| Nigeria         | 22.44                                | 14.00                                              | 22.44                                                            |
| Senegal         | 8.27                                 | 14.00                                              | 13.42                                                            |
| Zimbabwe        | 17.67                                | 16.00                                              | 25.13                                                            |
| Ethiopia        | 17.43                                | 17.43                                              | 39.83                                                            |
| Gabon           | 23.59                                | 18.27                                              | 23.59                                                            |
| Cameroon        | 20.62                                | 20.00                                              | 33.34                                                            |
| South Africa    | 17.23                                | 23.00                                              | 66.91                                                            |
| Congo           | 22.02                                | 23.52                                              | 26.39                                                            |
| Burkina Faso    | 6.47                                 | 27.30                                              | 16.45                                                            |
| Mozambique      | 37.94                                | 34.00                                              | 52.36                                                            |
| Tanzania        | 48.09                                | 48.00                                              | 63.38                                                            |
| Zambia          | 45.76                                | 48.00                                              | 58.97                                                            |
| Angola          | 69.38                                | 53.00                                              | 95.31                                                            |
| Sudan           | 19.21                                | 70.00                                              | 39.96                                                            |
| Dem. Rep. Congo | 131.66                               | 152.00                                             | 143.17                                                           |

Comparison of UNFCCC vs. FAO forest land area and FAO forest + other wood land (year 2015) in Mha

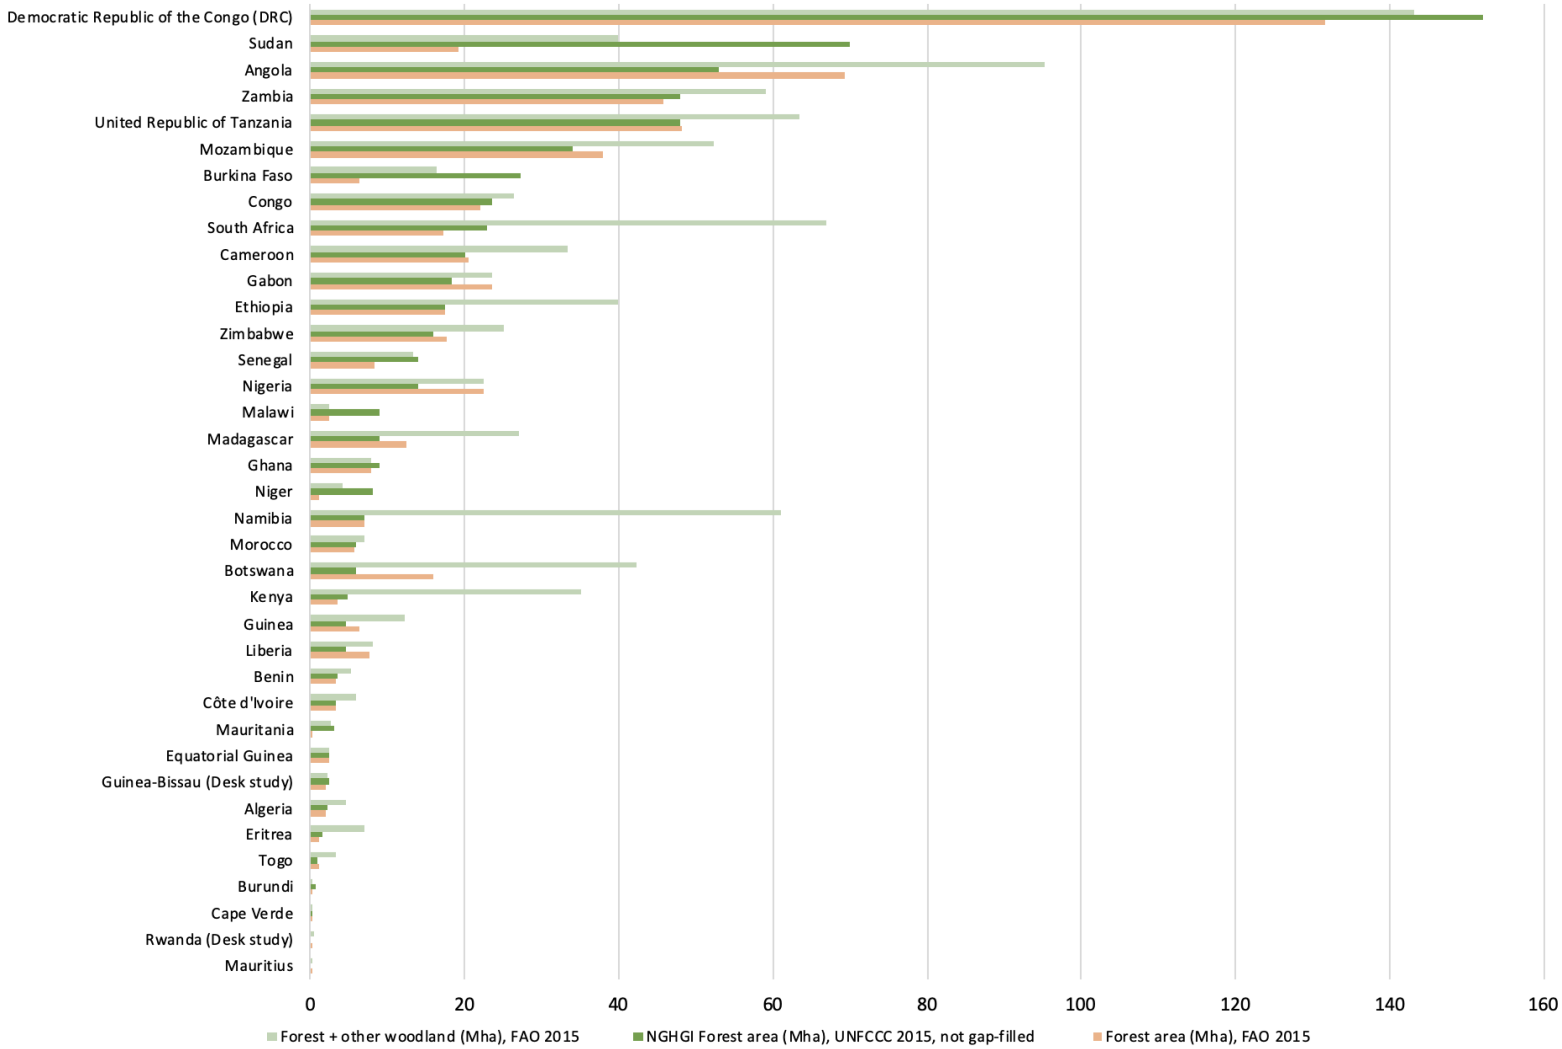

Figure S10. Bar plots comparing areas of managed land reported in NC/BUR/REDD+ versus FAO forest land (2015) in Mha and FAO forest land + other woodlands areas (2015) for African countries. (Source : Forest Resource Assessment, FAO). See also Table S7 for detailed values.

**Table S9. Synthesis of TD and BU mean CH<sub>4</sub> emissions and removals in MtCO<sub>2</sub>e.yr<sup>-1</sup> for the overlapping time series (2010-2017) for whole Africa and for the six groups using Method 1 (Foss+ AGRIW + BBUR - wildfires).**

| <b>Region</b>                  | <b>Rank median PRIMAP</b> | <b>Rank median GOSAT</b> | <b>Rank median surface inversions</b> | <b>Rank wetlands median GMB</b> | <b>Rank wildfires</b> | <b>Rank wetlands median GMB</b> |
|--------------------------------|---------------------------|--------------------------|---------------------------------------|---------------------------------|-----------------------|---------------------------------|
| <b>North Africa</b>            | <b>1</b>                  | <b>1</b>                 | <b>1</b>                              | <b>5</b>                        | <b>3</b>              | <b>5</b>                        |
| <b>Subsahelian West Africa</b> | <b>2</b>                  | <b>3</b>                 | <b>2</b>                              | <b>4</b>                        | <b>5</b>              | <b>4</b>                        |
| <b>Horn of Africa</b>          | <b>3</b>                  | <b>2</b>                 | <b>3</b>                              | <b>3</b>                        | <b>4</b>              | <b>3</b>                        |
| <b>Southern Africa</b>         | <b>4</b>                  | <b>5</b>                 | <b>5</b>                              | <b>2</b>                        | <b>1</b>              | <b>2</b>                        |
| <b>Central Africa</b>          | <b>5</b>                  | <b>4</b>                 | <b>4</b>                              | <b>1</b>                        | <b>2</b>              | <b>1</b>                        |
| <b>South Africa Group</b>      | <b>6</b>                  | <b>6</b>                 | <b>6</b>                              | <b>6</b>                        | <b>6</b>              | <b>6</b>                        |

**Table S10. Anomalies in ranking for TD and BU mean values on the overlapping time periods (2010-2017) for whole Africa, and for six African groups using Method 1 for anthropogenic CH<sub>4</sub> (FOSS + AGRIW + BBUR - wildfires).**

| <b>Region</b>                      | <b>PRIMAP</b> | <b>Median<br/>GOSAT<br/>inv.</b> | <b>Max<br/>GOSAT<br/>inv.</b> | <b>Min<br/>GOSAT<br/>inv.</b> | <b>Median<br/>surface<br/>inv.</b> | <b>Max<br/>surface<br/>inv.</b> | <b>Min<br/>surface<br/>inv.</b> | <b>Max<br/>wetlands<br/>GCB</b> | <b>Median<br/>wetlands<br/>GCB</b> | <b>Min<br/>wetlands<br/>GCB</b> | <b>Wildfires</b> |
|------------------------------------|---------------|----------------------------------|-------------------------------|-------------------------------|------------------------------------|---------------------------------|---------------------------------|---------------------------------|------------------------------------|---------------------------------|------------------|
| <b>Africa<br/>Total</b>            | 1231          | 1117                             | 1390                          | 903                           | 1094                               | 1330                            | 853                             | 946                             | 827                                | 481                             | 110              |
| <b>North<br/>Africa</b>            | 293           | 270                              | 330                           | 174                           | 302                                | 396                             | 245                             | 146                             | 69                                 | 34                              | 11               |
| <b>Subsahelian<br/>West Africa</b> | 272           | 186                              | 329                           | 174                           | 249                                | 396                             | 245                             | 161                             | 77                                 | 48                              | 8                |
| <b>Horn of<br/>Africa</b>          | 252           | 242                              | 551                           | 206                           | 237                                | 302                             | 183                             | 171                             | 86                                 | 47                              | 9                |
| <b>Southern<br/>Africa</b>         | 212           | 114                              | 173                           | 99                            | 114                                | 146                             | 91                              | 214                             | 102                                | 65                              | 41               |
| <b>Central<br/>Africa</b>          | 123           | 130                              | 170                           | 106                           | 123                                | 142                             | 88                              | 615                             | 428                                | 195                             | 40               |
| <b>South<br/>Africa<br/>Group</b>  | 78            | 91                               | 168                           | 75                            | 88                                 | 124                             | 65                              | 21                              | 13                                 | 2                               | 1                |

**Table S11. Synthesis of wetlands (GCB) mean CH<sub>4</sub> emissions and removals in MtCO<sub>2</sub>e.yr<sup>-1</sup> for the overlapping time series (2010-2017) for the whole Africa and six African groups.**

| <b>Region</b>                  | <b>Max wetlands GCB</b> | <b>Median wetlands GCB</b> | <b>Min wetlands GCB</b> |
|--------------------------------|-------------------------|----------------------------|-------------------------|
| <b>Africa</b>                  | 946                     | 827                        | 481                     |
| <b>North Africa</b>            | 146                     | 69                         | 34                      |
| <b>Subsahelian West Africa</b> | 161                     | 77                         | 48                      |
| <b>Horn of Africa</b>          | 171                     | 86                         | 47                      |
| <b>Southern Africa</b>         | 214                     | 102                        | 65                      |
| <b>Central Africa</b>          | 615                     | 428                        | 195                     |
| <b>South Africa group</b>      | 21                      | 13                         | 2                       |



Table S12. Comparison between N<sub>2</sub>O PRIMAP-hist mean values and the median of inversions on the overlapping period (2010-2017) for Africa and the six African groups in MtCO<sub>2</sub>e.yr<sup>-1</sup>

| Region                         | PRIMAP-hist | Median global inversions |
|--------------------------------|-------------|--------------------------|
| <b>Africa total</b>            | 360         | 1647<br>(1502 to 1760)   |
| <b>North Africa</b>            | 106         | 330<br>(274 to 419)      |
| <b>Subsahelian West Africa</b> | 68          | 271<br>(68 to 330)       |
| <b>Horn of Africa</b>          | 46          | 240<br>(217 to 265)      |
| <b>Southern Africa</b>         | 62          | 263<br>(214 to 310)      |
| <b>Central Africa</b>          | 182         | 461<br>(424 to 517)      |
| <b>South Africa group</b>      | 24          | 68<br>(51 to 81)         |

Table S13. Synthesis for the three main GHGs net African budget: comparative net emissions and removals computation by TD methods for Africa as a whole and for six sub-groups of African countries over the overlapping period (2001-2017), in MtCO<sub>2</sub>e. Use of Method 1 for CH<sub>4</sub> (FOS+AGRIW+BBUR-wildfires) excluding UNFCCC outliers, and including the range for GCP CO<sub>2</sub> LULUCF.

| Region                         | TD Method 1 and GCP for FCO <sub>2</sub>                                     |                                                                             |                                                                  |                                                                   | TD Method 1 and PRIMAP for FCO <sub>2</sub>                                  |                                                                             |                                                                  |                                                                   |
|--------------------------------|------------------------------------------------------------------------------|-----------------------------------------------------------------------------|------------------------------------------------------------------|-------------------------------------------------------------------|------------------------------------------------------------------------------|-----------------------------------------------------------------------------|------------------------------------------------------------------|-------------------------------------------------------------------|
|                                | CH <sub>4</sub> median GOSAT inversions + median N <sub>2</sub> O inversions | CH <sub>4</sub> median SURF inversions + median N <sub>2</sub> O inversions | CH <sub>4</sub> median SURF inversions + PRIMAP N <sub>2</sub> O | CH <sub>4</sub> median GOSAT inversions + PRIMAP N <sub>2</sub> O | CH <sub>4</sub> median GOSAT inversions + median N <sub>2</sub> O inversions | CH <sub>4</sub> median SURF inversions + median N <sub>2</sub> O inversions | CH <sub>4</sub> median SURF inversions + PRIMAP N <sub>2</sub> O | CH <sub>4</sub> median GOSAT inversions + PRIMAP N <sub>2</sub> O |
| <b>Africa total</b>            | 3889 <sup>7257</sup> <sub>1296</sub>                                         | 3866 <sup>7197</sup> <sub>1246</sub>                                        | 2579 <sup>5797</sup> <sub>104</sub>                              | 2602 <sup>5857</sup> <sub>154</sub>                               | 3983 <sup>7621</sup> <sub>1390</sub>                                         | 3960 <sup>7291</sup> <sub>1340</sub>                                        | 2673 <sup>5890</sup> <sub>198</sub>                              | 2696 <sup>5950</sup> <sub>248</sub>                               |
| <b>North Africa</b>            | 1014 <sup>1438</sup> <sub>553</sub>                                          | 1046 <sup>1504</sup> <sub>624</sub>                                         | 822 <sup>1190</sup> <sub>456</sub>                               | 790 <sup>1124</sup> <sub>385</sub>                                | 1022 <sup>1446</sup> <sub>591</sub>                                          | 1054 <sup>1511</sup> <sub>632</sub>                                         | 830 <sup>1232</sup> <sub>464</sub>                               | 798 <sup>1132</sup> <sub>393</sub>                                |
| <b>Central Africa</b>          | 758 <sup>2064</sup> <sub>758</sub>                                           | 751 <sup>2036</sup> <sub>776</sub>                                          | 344 <sup>1573</sup> <sub>1145</sub>                              | 351 <sup>1602</sup> <sub>1128</sub>                               | 766 <sup>2072</sup> <sub>750</sub>                                           | 759 <sup>2043</sup> <sub>768</sub>                                          | 352 <sup>1582</sup> <sub>1138</sub>                              | 359 <sup>1610</sup> <sub>1120</sub>                               |
| <b>Subsahelian West Africa</b> | 546 <sup>1282</sup> <sub>95</sub>                                            | 609 <sup>1349</sup> <sub>24</sub>                                           | 406 <sup>1086</sup> <sub>24</sub>                                | 343 <sup>1019</sup> <sub>95</sub>                                 | 542 <sup>1278</sup> <sub>98</sub>                                            | 605 <sup>1345</sup> <sub>27</sub>                                           | 403 <sup>1083</sup> <sub>27</sub>                                | 340 <sup>1016</sup> <sub>98</sub>                                 |
| <b>Southern Africa</b>         | 616 <sup>1726</sup> <sub>175</sub>                                           | 616 <sup>1699</sup> <sub>186</sub>                                          | 415 <sup>1451</sup> <sub>338</sub>                               | 415 <sup>1478</sup> <sub>331</sub>                                | 618 <sup>1728</sup> <sub>340</sub>                                           | 618 <sup>1701</sup> <sub>348</sub>                                          | 416 <sup>1452</sup> <sub>337</sub>                               | 416 <sup>1479</sup> <sub>329</sub>                                |
| <b>South Africa group</b>      | 458 <sup>710</sup> <sub>103</sub>                                            | 455 <sup>747</sup> <sub>93</sub>                                            | 411 <sup>689</sup> <sub>116</sub>                                | 414 <sup>734</sup> <sub>126</sub>                                 | 537 <sup>871</sup> <sub>184</sub>                                            | 534 <sup>927</sup> <sub>172</sub>                                           | 490 <sup>769</sup> <sub>196</sub>                                | 493 <sup>813</sup> <sub>206</sub>                                 |
| <b>Horn of Africa</b>          | 399 <sup>1215</sup> <sub>274</sub>                                           | 394 <sup>966</sup> <sub>297</sub>                                           | 201 <sup>748</sup> <sub>467</sub>                                | 206 <sup>997</sup> <sub>444</sub>                                 | 401 <sup>1216</sup> <sub>273</sub>                                           | 395 <sup>967</sup> <sub>296</sub>                                           | 202 <sup>749</sup> <sub>467</sub>                                | 207 <sup>998</sup> <sub>444</sub>                                 |

Table S14. Synthesis for the three main GHGs net African budget: comparative net emissions and removals computation by TD methods for Africa as a whole and for six sub-groups of African countries over the overlapping period (2001-2017), in MtCO<sub>2</sub>e. Use of Method 1 for CH<sub>4</sub> (FOS+AGRIW+BBUR-wildfires) excluding UNFCCC outliers, and excluding the range for GCP CO<sub>2</sub> LULUCF (possible outliers).

| Region                         | TD Method 1 and GCP FCO <sub>2</sub>                                         |                                                                             |                                                                  |                                                                   | TD Method 1 and PRIMAP FCO <sub>2</sub>                                      |                                                                             |                                                                  |                                                                   |
|--------------------------------|------------------------------------------------------------------------------|-----------------------------------------------------------------------------|------------------------------------------------------------------|-------------------------------------------------------------------|------------------------------------------------------------------------------|-----------------------------------------------------------------------------|------------------------------------------------------------------|-------------------------------------------------------------------|
|                                | CH <sub>4</sub> median GOSAT inversions + median N <sub>2</sub> O inversions | CH <sub>4</sub> median SURF inversions + median N <sub>2</sub> O inversions | CH <sub>4</sub> median SURF inversions + PRIMAP N <sub>2</sub> O | CH <sub>4</sub> median GOSAT inversions + PRIMAP N <sub>2</sub> O | CH <sub>4</sub> median GOSAT inversions + median N <sub>2</sub> O inversions | CH <sub>4</sub> median SURF inversions + median N <sub>2</sub> O inversions | CH <sub>4</sub> median SURF inversions + PRIMAP N <sub>2</sub> O | CH <sub>4</sub> median GOSAT inversions + PRIMAP N <sub>2</sub> O |
| <b>Africa total</b>            | 3889 <sup>4276</sup> <sub>3530</sub>                                         | 3866 <sup>4216</sup> <sub>3480</sub>                                        | 2579 <sup>2815</sup> <sub>2338</sub>                             | 2602 <sup>2875</sup> <sub>2388</sub>                              | 3983 <sup>4639</sup> <sub>3624</sub>                                         | 3960 <sup>4309</sup> <sub>3574</sub>                                        | 2673 <sup>2909</sup> <sub>2432</sub>                             | 2696 <sup>2969</sup> <sub>2482</sub>                              |
| <b>North Africa</b>            | 1014 <sup>1164</sup> <sub>862</sub>                                          | 1046 <sup>1230</sup> <sub>933.1</sub>                                       | 822 <sup>916</sup> <sub>765</sub>                                | 790 <sup>850</sup> <sub>694</sub>                                 | 1022 <sup>1171</sup> <sub>870</sub>                                          | 1054 <sup>1237</sup> <sub>941</sub>                                         | 830 <sup>958</sup> <sub>773</sub>                                | 798 <sup>858</sup> <sub>702</sub>                                 |
| <b>Central Africa</b>          | 758 <sup>853</sup> <sub>697</sub>                                            | 751 <sup>826</sup> <sub>679</sub>                                           | 344 <sup>363</sup> <sub>309</sub>                                | 351 <sup>391</sup> <sub>327</sub>                                 | 766 <sup>862</sup> <sub>705</sub>                                            | 759 <sup>833</sup> <sub>687</sub>                                           | 352 <sup>371</sup> <sub>317</sub>                                | 359 <sup>399</sup> <sub>335</sub>                                 |
| <b>Subsahelian West Africa</b> | 546 <sup>748</sup> <sub>331</sub>                                            | 609 <sup>815</sup> <sub>402</sub>                                           | 406 <sup>553</sup> <sub>402</sub>                                | 343 <sup>486</sup> <sub>331</sub>                                 | 542 <sup>745</sup> <sub>328</sub>                                            | 605 <sup>812</sup> <sub>399</sub>                                           | 403 <sup>550</sup> <sub>399</sub>                                | 340 <sup>483</sup> <sub>328</sub>                                 |
| <b>Southern Africa</b>         | 616 <sup>722</sup> <sub>552</sub>                                            | 616 <sup>695</sup> <sub>544</sub>                                           | 415 <sup>447</sup> <sub>392</sub>                                | 415 <sup>474</sup> <sub>400</sub>                                 | 618 <sup>724</sup> <sub>390</sub>                                            | 618 <sup>697</sup> <sub>382</sub>                                           | 416 <sup>448</sup> <sub>393</sub>                                | 416 <sup>475</sup> <sub>401</sub>                                 |
| <b>South Africa group</b>      | 458 <sup>467</sup> <sub>374</sub>                                            | 455 <sup>504</sup> <sub>364</sub>                                           | 411 <sup>446</sup> <sub>388</sub>                                | 414 <sup>491</sup> <sub>398</sub>                                 | 537 <sup>628</sup> <sub>453</sub>                                            | 534 <sup>584</sup> <sub>443</sub>                                           | 490 <sup>526</sup> <sub>467</sub>                                | 493 <sup>570</sup> <sub>477</sub>                                 |
| <b>Horn of Africa</b>          | 399 <sup>733</sup> <sub>340</sub>                                            | 394 <sup>484</sup> <sub>317</sub>                                           | 201 <sup>266</sup> <sub>147</sub>                                | 206 <sup>515</sup> <sub>179</sub>                                 | 400 <sup>734</sup> <sub>341</sub>                                            | 395 <sup>485</sup> <sub>318</sub>                                           | 202 <sup>267</sup> <sub>148</sub>                                | 207 <sup>516</sup> <sub>171</sub>                                 |

**Table S15. Mean net total Africa and regional groups from mean TD (excluding the range for CO<sub>2</sub> LULUCF due to outliers) and mean best fitted BU Methods excluding outliers. (For TD approaches, N<sub>2</sub>O inversions were excluded and replaced by PRIMAP estimates. For DGVMs the range for GCP CO<sub>2</sub> LULUCF was not considered due to probable outliers. UNFCCC outliers are also excluded.) Net emissions and removals are expressed in MtCO<sub>2e</sub>.yr<sup>-1</sup> over the overlapping period (2001-2017).**

| <b>Region</b>                  | <b>Mean of TD methods</b><br>excluding N <sub>2</sub> O inversions replaced<br>with N <sub>2</sub> O PRIMAP and excluding<br>the range for GCP CO <sub>2</sub> LULUCF<br>(with probable outliers)                       | <b>Ranking</b><br><b>with TD</b><br><b>methods</b> | <b>Mean net of best fitted BU methods</b><br>(excluding uncorrected UNFCCC data)                                                                                                                                        | <b>Ranking with BU</b><br><b>methods</b> |
|--------------------------------|-------------------------------------------------------------------------------------------------------------------------------------------------------------------------------------------------------------------------|----------------------------------------------------|-------------------------------------------------------------------------------------------------------------------------------------------------------------------------------------------------------------------------|------------------------------------------|
| <b>North Africa</b>            | 806 <sup>883</sup> <sub>730</sub> (GCP FCO <sub>2</sub> )<br>814 <sup>908</sup> <sub>737</sub> (PRIMAP FCO <sub>2</sub> )<br>Mean GCP & PRIMAP (FCO <sub>2</sub> ):<br><b>810<sup>895</sup></b> <sub>733</sub>          | 1                                                  | 713 <sup>807</sup> <sub>641</sub> (GCP FCO <sub>2</sub> )<br>720 <sup>816</sup> <sub>649</sub> (PRIMAP FCO <sub>2</sub> )<br>Mean GCP & PRIMAP (FCO <sub>2</sub> ):<br><b>717<sup>812</sup></b> <sub>645</sub>          | 1                                        |
| <b>South Africa group</b>      | 412 <sup>468</sup> <sub>393</sub> (GCP FCO <sub>2</sub> )<br>491 <sup>547</sup> <sub>472</sub> (PRIMAP FCO <sub>2</sub> )<br>Mean GCP & PRIMAP (FCO <sub>2</sub> ):<br><b>452<sup>508</sup></b> <sub>432</sub>          | 2                                                  | 534 <sup>613</sup> <sub>443</sub> (GCP FCO <sub>2</sub> )<br>613 <sup>692</sup> <sub>522</sub> (PRIMAP FCO <sub>2</sub> )<br>Mean GCP & PRIMAP (FCO <sub>2</sub> ):<br><b>574<sup>653</sup></b> <sub>483</sub>          | 3                                        |
| <b>Horn of Africa</b>          | 203 <sup>390</sup> <sub>158</sub> (GCP FCO <sub>2</sub> )<br>204 <sup>391</sup> <sub>159</sub> (PRIMAP FCO <sub>2</sub> )<br>Mean GCP & PRIMAP (FCO <sub>2</sub> ):<br><b>204<sup>391</sup></b> <sub>159</sub>          | 6                                                  | 432 <sup>524</sup> <sub>296</sub> (GCP FCO <sub>2</sub> )<br>433 <sup>525</sup> <sub>297</sub> (PRIMAP FCO <sub>2</sub> )<br>Mean GCP & PRIMAP (FCO <sub>2</sub> ):<br><b>433<sup>525</sup></b> <sub>297</sub>          | 4                                        |
| <b>Subsahelian West Africa</b> | 375 <sup>520</sup> <sub>367</sub> (GCP FCO <sub>2</sub> )<br>371 <sup>516</sup> <sub>363</sub> (PRIMAP FCO <sub>2</sub> )<br>Mean GCP & PRIMAP (FCO <sub>2</sub> ):<br><b>373<sup>518</sup></b> <sub>365</sub>          | 4                                                  | 612 <sup>776</sup> <sub>539</sub> (GCP FCO <sub>2</sub> )<br>609 <sup>772</sup> <sub>535</sub> (PRIMAP FCO <sub>2</sub> )<br>Mean GCP & PRIMAP (FCO <sub>2</sub> ):<br><b>610<sup>774</sup></b> <sub>537</sub>          | 2                                        |
| <b>Southern Africa</b>         | 415 <sup>460</sup> <sub>396</sub> (GCP FCO <sub>2</sub> )<br>416 <sup>462</sup> <sub>397</sub> (PRIMAP FCO <sub>2</sub> )<br>Mean GCP & PRIMAP (FCO <sub>2</sub> ):<br><b>416<sup>461</sup></b> <sub>397</sub>          | 3                                                  | 228 <sup>529</sup> <sub>178</sub> (GCP FCO <sub>2</sub> )<br>355 <sup>531</sup> <sub>179</sub> (PRIMAP FCO <sub>2</sub> )<br>Mean GCP & PRIMAP (FCO <sub>2</sub> ):<br><b>292<sup>530</sup></b> <sub>178</sub>          | 5                                        |
| <b>Central Africa</b>          | 348 <sup>377</sup> <sub>318</sub> (GCP FCO <sub>2</sub> )<br>356 <sup>385</sup> <sub>326</sub> (PRIMAP FCO <sub>2</sub> )<br>Mean GCP & PRIMAP (FCO <sub>2</sub> ):<br><b>352<sup>381</sup></b> <sub>322</sub>          | 5                                                  | -70 <sup>168</sup> <sub>-210</sub> (GCP FCO <sub>2</sub> )<br>-62 <sup>176</sup> <sub>-202</sub> (PRIMAP FCO <sub>2</sub> )<br>Mean GCP & PRIMAP (FCO <sub>2</sub> ):<br><b>-66<sup>172</sup></b> <sub>-206</sub>       | 6                                        |
| <b>Africa total</b>            | 2591 <sup>2845</sup> <sub>2363</sub> (GCP FCO <sub>2</sub> )<br>2684 <sup>2939</sup> <sub>2457</sub> (PRIMAP FCO <sub>2</sub> )<br>Mean GCP & PRIMAP (FCO <sub>2</sub> ):<br><b>2638<sup>2892</sup></b> <sub>2410</sub> |                                                    | 2576 <sup>3228</sup> <sub>2140</sub> (GCP FCO <sub>2</sub> )<br>2669 <sup>3251</sup> <sub>2233</sub> (PRIMAP FCO <sub>2</sub> )<br>Mean GCP & PRIMAP (FCO <sub>2</sub> ):<br><b>2623<sup>3240</sup></b> <sub>2186</sub> |                                          |

**Table S16. Mean net total Africa and regional groups from best fitted mean TD and mean BU Methods excluding outliers. For TD approaches, N<sub>2</sub>O inversions were excluded and replaced by PRIMAP estimates. For DGVMs, the range for GCP CO<sub>2</sub> LULUCF was considered. UNFCCC outliers are also excluded. Net emissions and removals are expressed in MtCO<sub>2</sub>.yr<sup>-1</sup> over the overlapping period (2001-2017).**

| Region                             | Mean net of TD methods<br>(including range for CO <sub>2</sub> LULUCF<br>from GCP inversions with outliers<br>but excluding N <sub>2</sub> O inversions (N <sub>2</sub> O<br>PRIMAP)                                    | Ranking with TD<br>methods | Mean net of best fitted BU<br>methods<br>(excluding uncorrected UNFCCC<br>data)                                                                                                                                         | Ranking with BU<br>methods |
|------------------------------------|-------------------------------------------------------------------------------------------------------------------------------------------------------------------------------------------------------------------------|----------------------------|-------------------------------------------------------------------------------------------------------------------------------------------------------------------------------------------------------------------------|----------------------------|
| <b>North Africa</b>                | 806 <sup>1157</sup> <sub>129</sub> (GCP FCO <sub>2</sub> )<br>814 <sup>1182</sup> <sub>428</sub> (PRIMAP FCO <sub>2</sub> )<br>Mean GCP & PRIMAP:<br><b>810<sup>1170</sup></b> <sub>279</sub>                           | 1                          | 713 <sup>807</sup> <sub>641</sub> (GCP FCO <sub>2</sub> )<br>720 <sup>816</sup> <sub>649</sub> (PRIMAP FCO <sub>2</sub> )<br>Mean GCP & PRIMAP (FCO <sub>2</sub> ):<br><b>717<sup>812</sup></b> <sub>645</sub>          | 1                          |
| <b>South Africa group</b>          | 412 <sup>712</sup> <sub>121</sub> (GCP FCO <sub>2</sub> )<br>491 <sup>791</sup> <sub>201</sub> (PRIMAP FCO <sub>2</sub> )<br>Mean GCP & PRIMAP:<br><b>452<sup>751</sup></b> <sub>161</sub>                              | 2                          | 534 <sup>613</sup> <sub>443</sub> (GCP FCO <sub>2</sub> )<br>613 <sup>692</sup> <sub>522</sub> (PRIMAP FCO <sub>2</sub> )<br>Mean GCP & PRIMAP (FCO <sub>2</sub> ):<br><b>574<sup>653</sup></b> <sub>483</sub>          | 3                          |
| <b>Horn of Africa</b>              | 203 <sup>872</sup> <sub>-456</sub> (GCP FCO <sub>2</sub> )<br>204 <sup>873</sup> <sub>-455</sub> (PRIMAP FCO <sub>2</sub> )<br>Mean GCP & PRIMAP:<br><b>204<sup>873</sup></b> <sub>-456</sub>                           | 6                          | 432 <sup>524</sup> <sub>296</sub> (GCP FCO <sub>2</sub> )<br>433 <sup>525</sup> <sub>297</sub> (PRIMAP FCO <sub>2</sub> )<br>Mean GCP & PRIMAP (FCO <sub>2</sub> ):<br><b>433<sup>525</sup></b> <sub>296</sub>          | 4                          |
| <b>Subsahelian West<br/>Africa</b> | 375 <sup>1053</sup> <sub>36</sub> (GCP FCO <sub>2</sub> )<br>371 <sup>1050</sup> <sub>36</sub> (PRIMAP FCO <sub>2</sub> )<br>Mean GCP & PRIMAP:<br><b>373<sup>1051</sup></b> <sub>356</sub>                             | 4                          | 612 <sup>776</sup> <sub>539</sub> (GCP FCO <sub>2</sub> )<br>609 <sup>772</sup> <sub>535</sub> (PRIMAP FCO <sub>2</sub> )<br>Mean GCP & PRIMAP (FCO <sub>2</sub> ):<br><b>610<sup>774</sup></b> <sub>537</sub>          | 2                          |
| <b>Southern Africa</b>             | 415 <sup>1464</sup> <sub>-335</sub> (GCP FCO <sub>2</sub> )<br>416 <sup>1466</sup> <sub>-333</sub> (PRIMAP FCO <sub>2</sub> )<br>Mean GCP & PRIMAP:<br><b>416<sup>1465</sup></b> <sub>-334</sub>                        | 3                          | 228 <sup>529</sup> <sub>178</sub> (GCP FCO <sub>2</sub> )<br>355 <sup>531</sup> <sub>173</sub> (PRIMAP FCO <sub>2</sub> )<br>Mean GCP & PRIMAP (FCO <sub>2</sub> ):<br><b>292<sup>530</sup></b> <sub>178</sub>          | 5                          |
| <b>Central Africa</b>              | 348 <sup>1588</sup> <sub>-1137</sub> (GCP FCO <sub>2</sub> )<br>356 <sup>1596</sup> <sub>-1129</sub> (PRIMAP FCO <sub>2</sub> )<br>Mean GCP & PRIMAP (FCO <sub>2</sub> ):<br><b>352<sup>1592</sup></b> <sub>-1133</sub> | 5                          | -70 <sup>168</sup> <sub>-210</sub> (GCP FCO <sub>2</sub> )<br>-62 <sup>176</sup> <sub>-202</sub> (PRIMAP FCO <sub>2</sub> )<br>Mean GCP & PRIMAP (FCO <sub>2</sub> ):<br><b>-66<sup>172</sup></b> <sub>-206</sub>       | 6                          |
| <b>Africa total</b>                | 2583 <sup>3037</sup> <sub>2251</sub> (GCP FCO <sub>2</sub> )<br>2654 <sup>3089</sup> <sub>2322</sub> (PRIMAP FCO <sub>2</sub> )<br>Mean GCP & PRIMAP (FCO <sub>2</sub> ):<br><b>2638<sup>5873</sup></b> <sub>1761</sub> |                            | 2576 <sup>3228</sup> <sub>2140</sub> (GCP FCO <sub>2</sub> )<br>2669 <sup>3251</sup> <sub>2233</sub> (PRIMAP FCO <sub>2</sub> )<br>Mean GCP & PRIMAP (FCO <sub>2</sub> ):<br><b>2623<sup>3240</sup></b> <sub>2186</sub> |                            |

**Table S17. Mean net total of best fitted mean TD and mean BU methods excluding N<sub>2</sub>O inversions (replaced by PRIMAP estimates), using Method 1 for CH<sub>4</sub> (FOS+AGRIW+BBUR-wildfires) excluding UNFCCC outliers, and including the range for GCP CO<sub>2</sub> LULUCF, for Africa total and for regional groups, with associated ranking.**

| <b>Region</b>                  | <b>Mean of best fitted TD and BU methods using both GCP and PRIMAP FCO<sub>2</sub></b><br>(excluding UNFCCC outliers and N <sub>2</sub> O inversions, but including range for CO <sub>2</sub> LULUCF from GCP inversions) | <b>Ranking with TD methods</b> |
|--------------------------------|---------------------------------------------------------------------------------------------------------------------------------------------------------------------------------------------------------------------------|--------------------------------|
| <b>North Africa</b>            | 761 <sup>988</sup> <sub>460</sub>                                                                                                                                                                                         | 1                              |
| <b>South Africa group</b>      | 513 <sup>702</sup> <sub>161</sub>                                                                                                                                                                                         | 2                              |
| <b>Horn of Africa</b>          | 318 <sup>699</sup> <sub>-80</sub>                                                                                                                                                                                         | 5                              |
| <b>Subsahelian West Africa</b> | 492 <sup>913</sup> <sub>286</sub>                                                                                                                                                                                         | 3                              |
| <b>Southern Africa</b>         | 354 <sup>998</sup> <sub>-78</sub>                                                                                                                                                                                         | 4                              |
| <b>Central Africa</b>          | 143 <sup>882</sup> <sub>-670</sub>                                                                                                                                                                                        | 6                              |
| <b>Africa total</b>            | 2630 <sup>4557</sup> <sub>1974</sub>                                                                                                                                                                                      |                                |

**Table S18. Mean net total Africa and regional groups from TD inversions only including N<sub>2</sub>O inversions (and the range for CO<sub>2</sub> LULUCF from GCP inversions). For BU methods, UNFCCC outliers are excluded.**

| Region                  | Mean TD from inversions only<br>(including range for CO <sub>2</sub> LULUCF from GCP inversions<br>and N <sub>2</sub> O inversions)                                                                                     | Ranking with BU methods |
|-------------------------|-------------------------------------------------------------------------------------------------------------------------------------------------------------------------------------------------------------------------|-------------------------|
| North Africa            | 1030 <sup>1471</sup> <sub>589</sub> (GCP FCO <sub>2</sub> )<br>1038 <sup>1479</sup> <sub>512</sub> (PRIMAP FCO <sub>2</sub> )<br>Mean GCP & PRIMAP (FCO <sub>2</sub> ):<br><b>1034<sup>1475</sup></b> <sub>600</sub>    | 1                       |
| South Africa group      | 457 <sup>729</sup> <sub>98</sub> (GCP FCO <sub>2</sub> )<br>536 <sup>899</sup> <sub>178</sub> (PRIMAP FCO <sub>2</sub> )<br>Mean GCP & PRIMAP (FCO <sub>2</sub> ):<br><b>496<sup>814</sup></b> <sub>138</sub>           | 5                       |
| Horn of Africa          | 397 <sup>1090</sup> <sub>-286</sub> (GCP FCO <sub>2</sub> )<br>398 <sup>1091</sup> <sub>-285</sub> (PRIMAP FCO <sub>2</sub> )<br>Mean GCP & PRIMAP (FCO <sub>2</sub> ):<br><b>397<sup>1091</sup></b> <sub>-285</sub>    | 6                       |
| Subsahelian West Africa | 577 <sup>1315</sup> <sub>-60</sub> (GCP FCO <sub>2</sub> )<br>574 <sup>1312</sup> <sub>-63</sub> (PRIMAP FCO <sub>2</sub> )<br>Mean GCP & PRIMAP (FCO <sub>2</sub> ):<br><b>576<sup>1313</sup></b> <sub>-61</sub>       | 4                       |
| Southern Africa         | 616 <sup>1713</sup> <sub>-181</sub> (GCP FCO <sub>2</sub> )<br>618 <sup>1714</sup> <sub>-344</sub> (PRIMAP FCO <sub>2</sub> )<br>Mean GCP & PRIMAP (FCO <sub>2</sub> ):<br><b>617<sup>1713</sup></b> <sub>-262</sub>    | 3                       |
| Central Africa          | 755 <sup>2050</sup> <sub>-767</sub> (GCP FCO <sub>2</sub> )<br>763 <sup>2058</sup> <sub>-759</sub> (PRIMAP FCO <sub>2</sub> )<br>Mean GCP & PRIMAP (FCO <sub>2</sub> ):<br><b>759<sup>2054</sup></b> <sub>-763</sub>    | 2                       |
| Africa total            | 3787 <sup>7226</sup> <sub>1274</sub> (GCP FCO <sub>2</sub> )<br>3971 <sup>7456</sup> <sub>1365</sub> (PRIMAP FCO <sub>2</sub> )<br>Mean GCP & PRIMAP (FCO <sub>2</sub> ):<br><b>3879<sup>7341</sup></b> <sub>1320</sub> |                         |



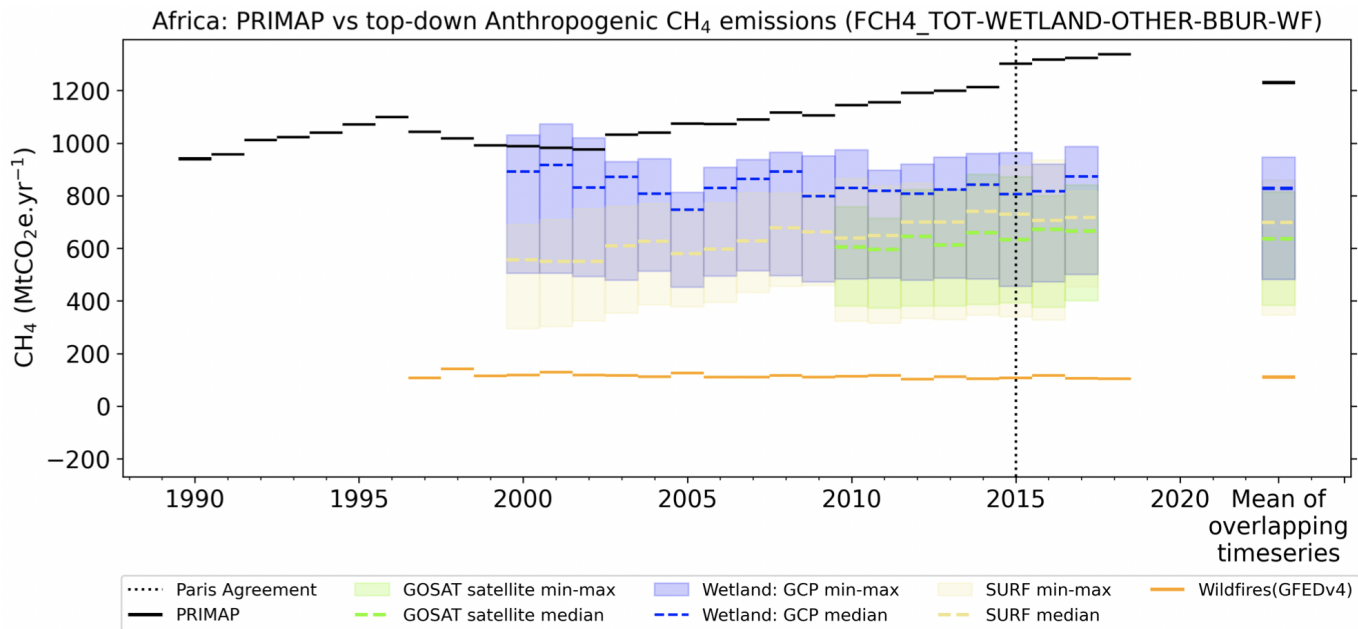

**Figure S11. Comparison of the total anthropogenic CH<sub>4</sub> emissions from PRIMAP-hist and 22 top-down global ensembles using Method 2 for total Africa, including wildfire emissions. Anthropogenic CH<sub>4</sub> emissions from TD methods were computed by withdrawing the sum of available data regarding natural emissions from the total flux (wetlands, “other natural” emissions, biomass burning, and wildfires (GFEDv4)). Black lines denote the PRIMAP-hist estimates for total anthropogenic emissions including all IPCC sectors. Shaded green areas represent the minimum and maximum ranges from satellite concentration observations (GOSAT) inversions. Shaded blue areas represent the minimum and maximum ranges for wetlands. Shaded yellow areas represent the minimum and maximum ranges for surface stations (SURF). Green dashes denote the median of 11 global GOSAT satellites, blue dashes denote the median of wetlands, yellow dashes the median of inversions using surface stations (SURF). The orange lines represent wildfire emissions. Following the atmospheric convention, positive numbers represent an emission to the atmosphere.**

Proposal for innovative systematic correction methods for non Annex I countries in the face of net GHGs assessment uncertainty under the PA regime.

What is the « true » country net estimate?

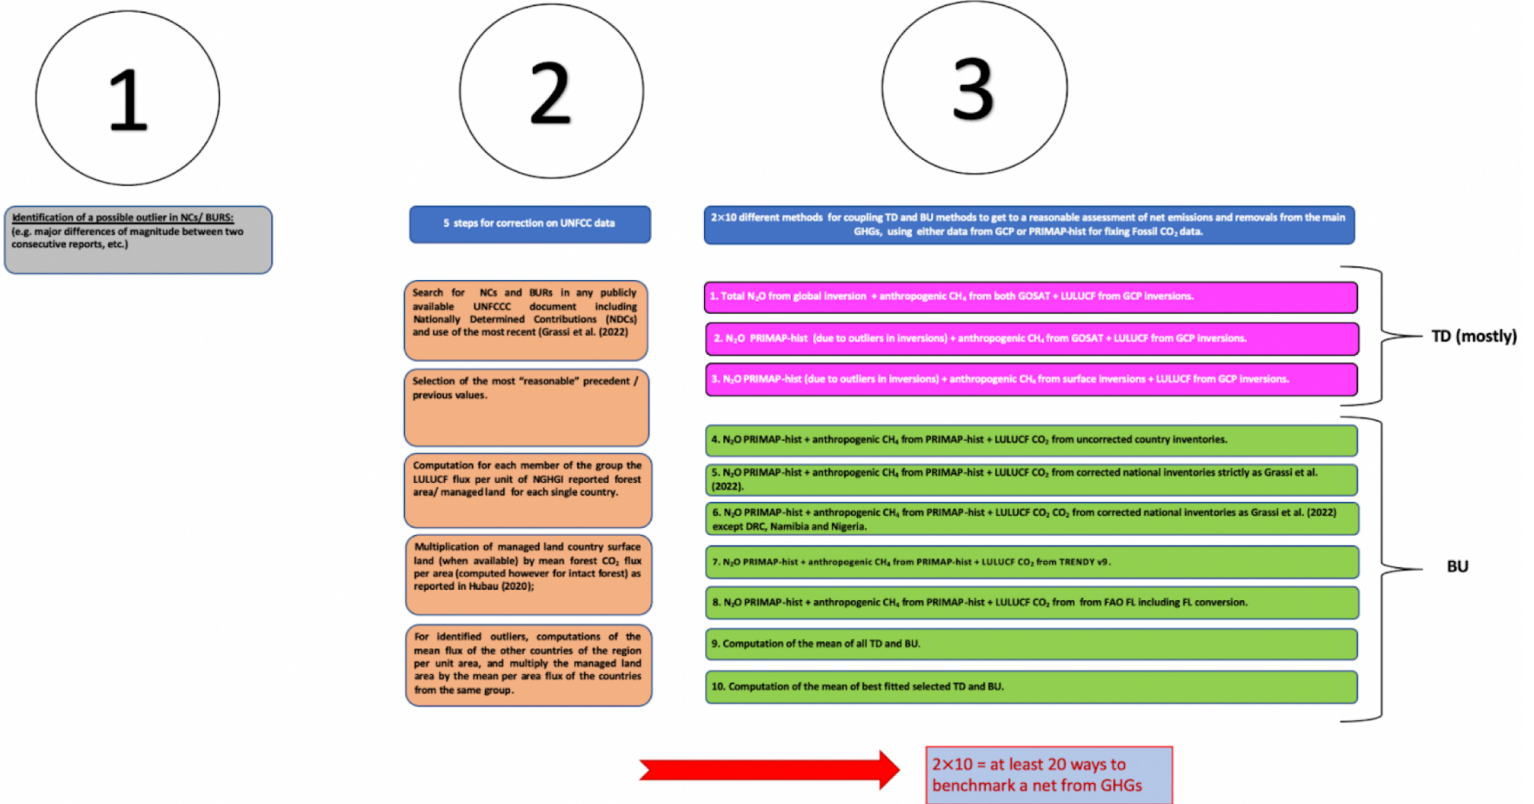

Figure S12. Synthesis of the different methodological steps used in this paper for assessing net African GHG trends.
